# Supplementary material for: Cross-Sections of Nanocellulose from Wood Analyzed by Quantized Polydispersity of Elementary Microfibrils
Source: PubMed Central journal article supplement — ACS Nano. 2020 Nov 30;14(12):16743–54. doi: 10.1021/acsnano.0c04570 (PMC8926302; doi:10.1021/acsnano.0c04570), 2020-11-30

# **Cross-Sections of Nanocellulose from Wood Analyzed by Quantized Polydispersity of Elementary Microfibrils**

## **Supplementary material**

Tomas Rosén<sup>a,b,c</sup>, HongRui He<sup>a</sup>, Ruifu Wang<sup>a</sup>, Chengbo Zhan<sup>a</sup>, Shirish Chodankar<sup>d</sup>, Andreas Fall<sup>e</sup>, Christian Aulin<sup>e</sup>, Per Tomas Larsson<sup>c,e</sup>, Tom Lindström<sup>a</sup>, and Benjamin S. Hsiao<sup>a,1</sup>

<sup>a</sup> Department of Chemistry, Stony Brook University, Stony Brook, NY 11794-3400, USA

<sup>b</sup> Fiber and Polymer Technology, KTH Royal Institute of Technology, SE-100 44, Stockholm, Sweden

<sup>c</sup> Wallenberg Wood Science Center, KTH Royal Institute of Technology, SE-100 44, Stockholm, Sweden

<sup>d</sup> National Synchrotron Light Source II, Brookhaven National Lab, Upton, NY 11793, USA

<sup>e</sup> RISE, Box 5604, 114 86, Stockholm, Sweden

<sup>1</sup>To whom correspondence should be addressed

**Contents:**

- TEM images of the 18 CNF samples in the study
- Assessment of isotropy in WAXD experiments
- Results from WAXD simulations

Additionally, a supplementary movie is provided to illustrate the principle of the WAXD simulations.

## **TEM images of CNF samples**

# TEMPO-oxidized CNF (low charge)

Sample #

TEM

1

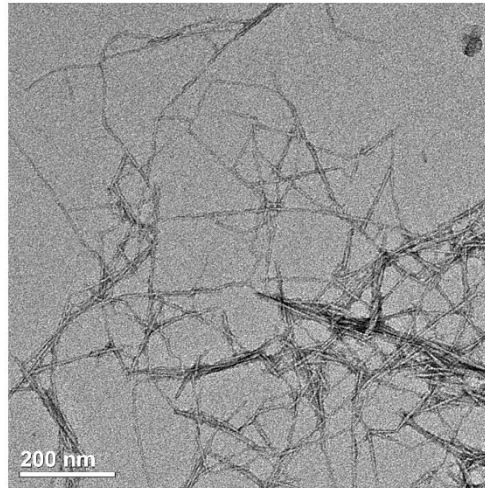

Average width based on  
>60 nanofibrils: 6.9 nm  
Standard deviation: 1.4 nm

2

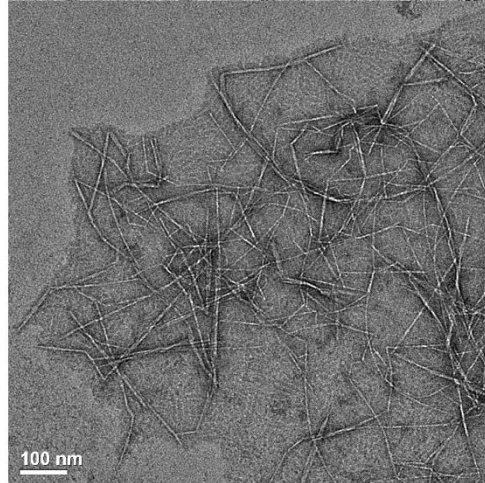

Average width based on  
>60 nanofibrils: 6.3 nm  
Standard deviation: 1.3 nm

3

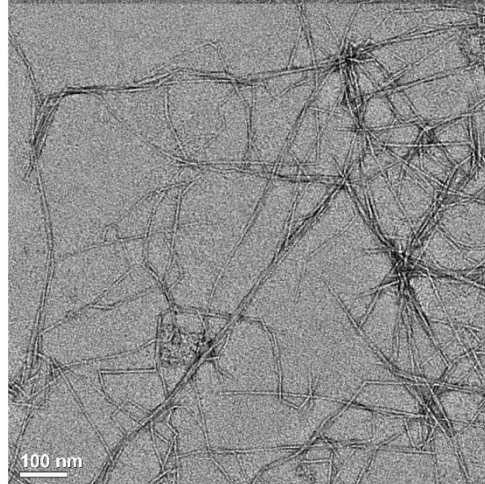

Average width based on  
>60 nanofibrils: 7.4 nm  
Standard deviation: 2.5 nm

# TEMPO-oxidized CNF (high charge)

Sample #

TEM

4

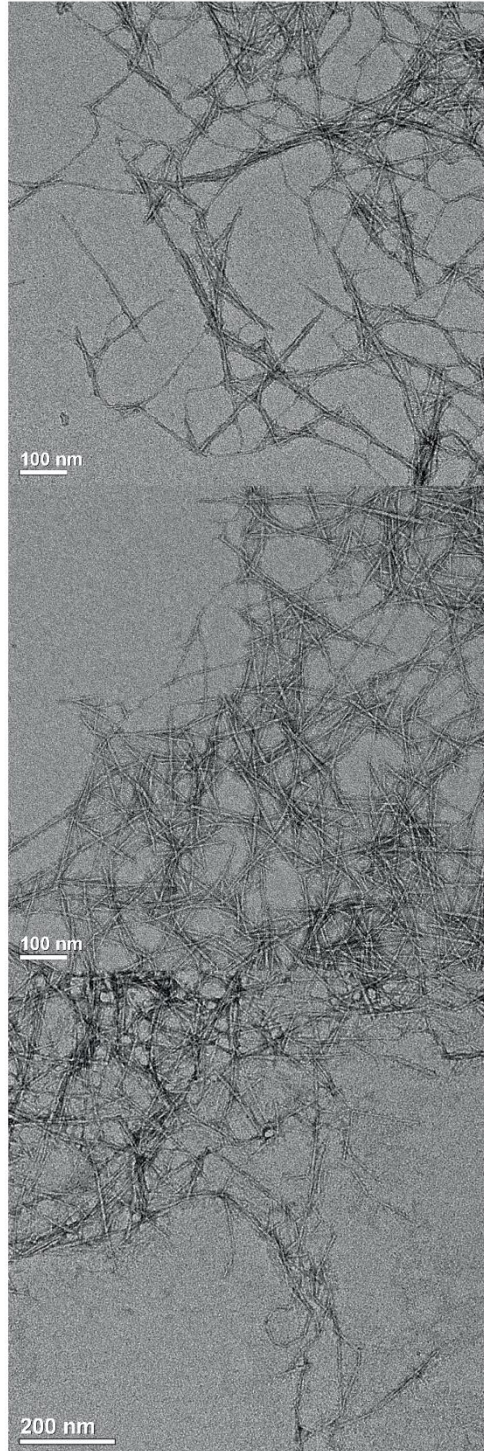

Average width based on  
>60 nanofibrils: 6.9 nm

Standard deviation: 2.3 nm

5



Average width based on  
>60 nanofibrils: 6.0 nm

Standard deviation: 2.4 nm

6



Average width based on  
>60 nanofibrils: 7.1 nm

Standard deviation: 1.5 nm

## Carboxymethylated CNF (lowest charge)

Sample #

TEM

7

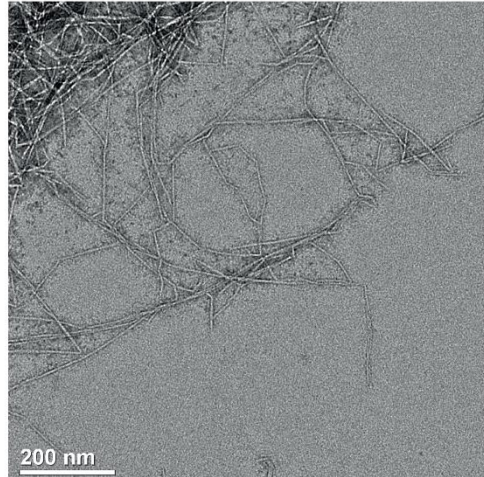

Average width based on  
>60 nanofibrils: 6.2 nm

Standard deviation: 1.1 nm

8

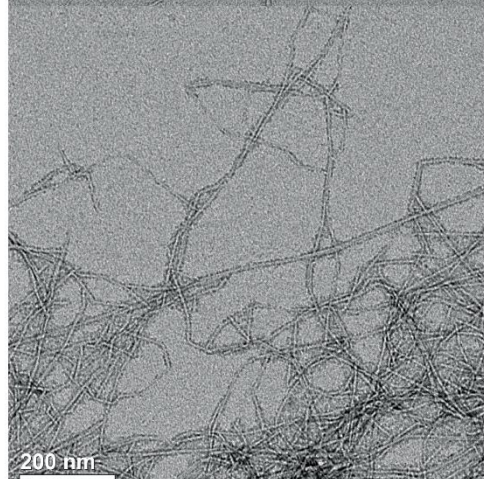

Average width based on  
>60 nanofibrils: 5.9 nm

Standard deviation: 1.1 nm

9

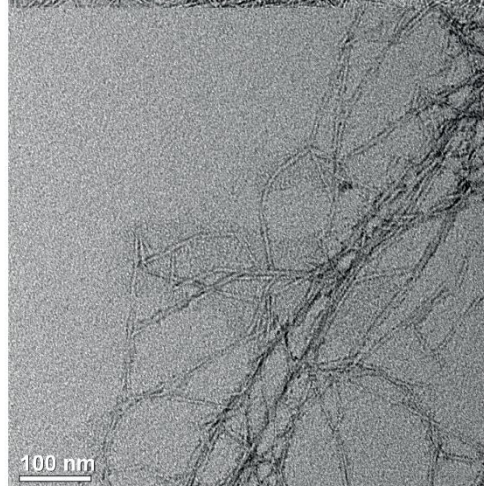

Average width based on  
>60 nanofibrils: 6.1 nm

Standard deviation: 1.2 nm

# Carboxymethylated CNF (low charge)

Sample #

TEM

10

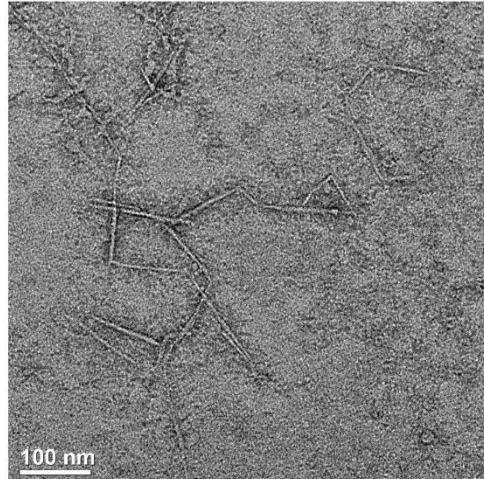

Average width based on  
>60 nanofibrils: 6.3 nm  
Standard deviation: 1.3 nm

11

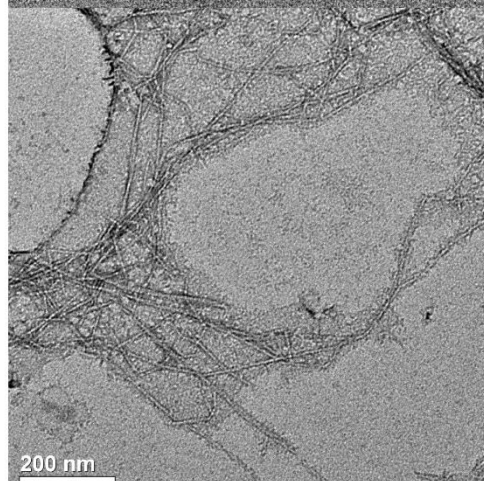

Average width based on  
>60 nanofibrils: 5.8 nm  
Standard deviation: 1.2 nm

12

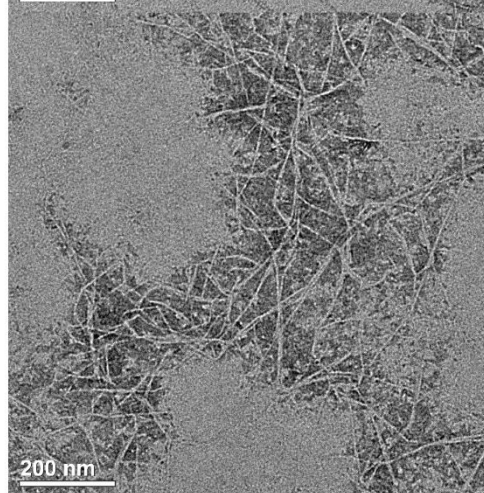

Average width based on  
>60 nanofibrils: 5.9 nm  
Standard deviation: 1.2 nm

## Carboxymethylated CNF (high charge)

Sample #

TEM

13

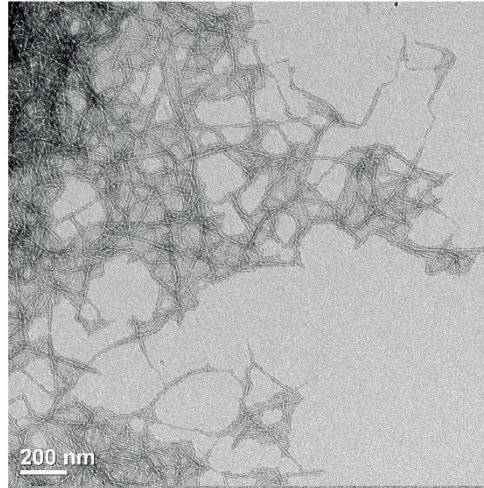

Average width based on  
>60 nanofibrils: 8.2 nm  
Standard deviation: 2.0 nm

14

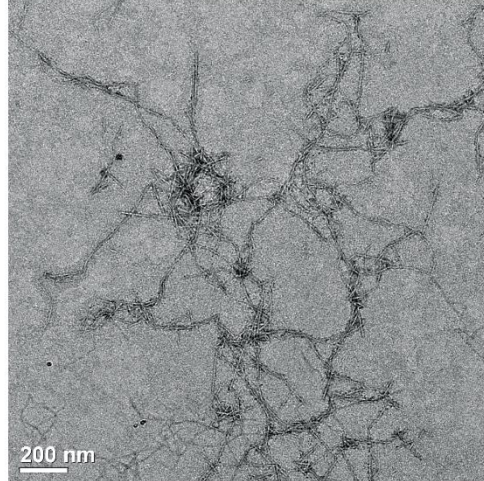

Average width based on  
>60 nanofibrils: 5.0 nm  
Standard deviation: 1.0 nm

15

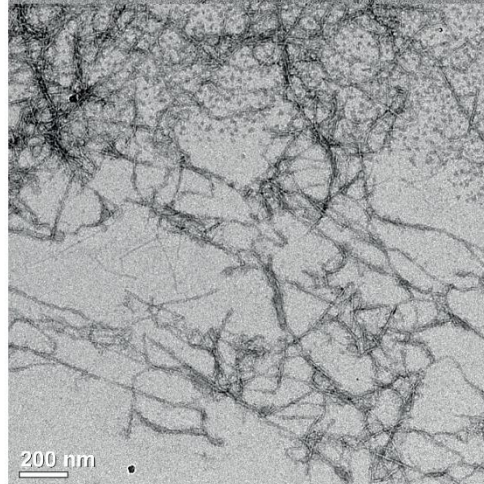

Average width based on  
>60 nanofibrils: 6.9 nm  
Standard deviation: 1.3 nm



## Carboxymethylated CNF (highest charge)

Sample #

TEM

16

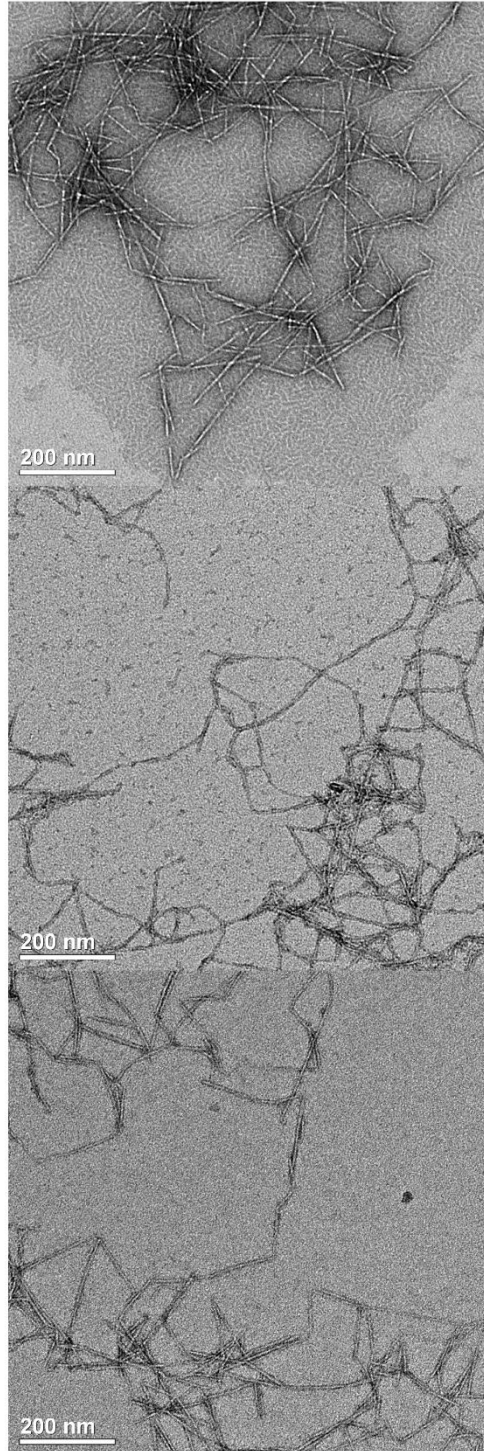

Average width based on  
>60 nanofibrils: 7.7 nm  
Standard deviation: 1.8 nm

17



Average width based on  
>60 nanofibrils: 6.8 nm  
Standard deviation: 2.0 nm

18



Average width based on  
>60 nanofibrils: 6.1 nm  
Standard deviation: 1.2 nm

**WAXD experiments: ensuring isotropy of samples**

## Procedure:

Simultaneous SAXS and WAXD signals were recorded on 3 different detectors (average of 5 different measurement locations, each with 1 s exposure):

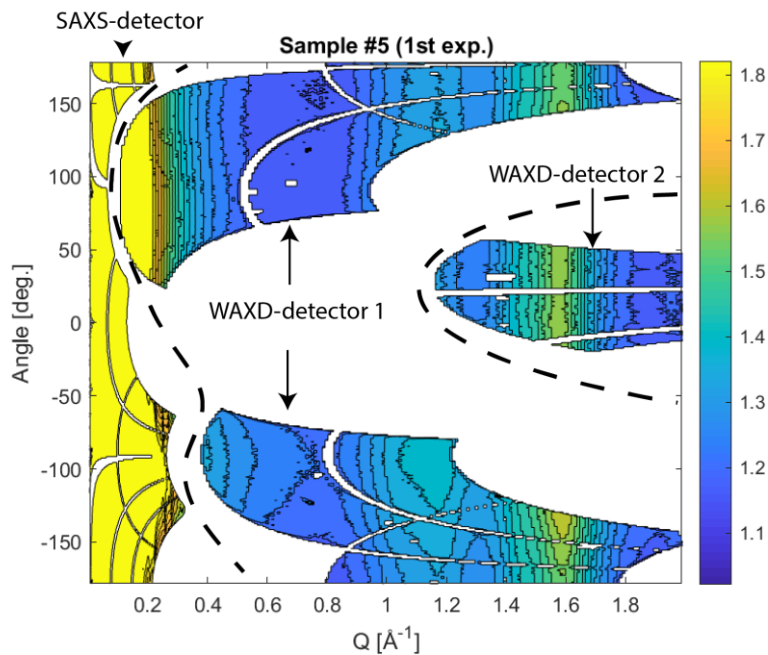

The in-accessible (zero) pixels at an angle  $\chi$  are corrected with data from the corresponding mirror-pixel (if accessible) at  $\chi \pm 180^\circ$ , due to symmetry:

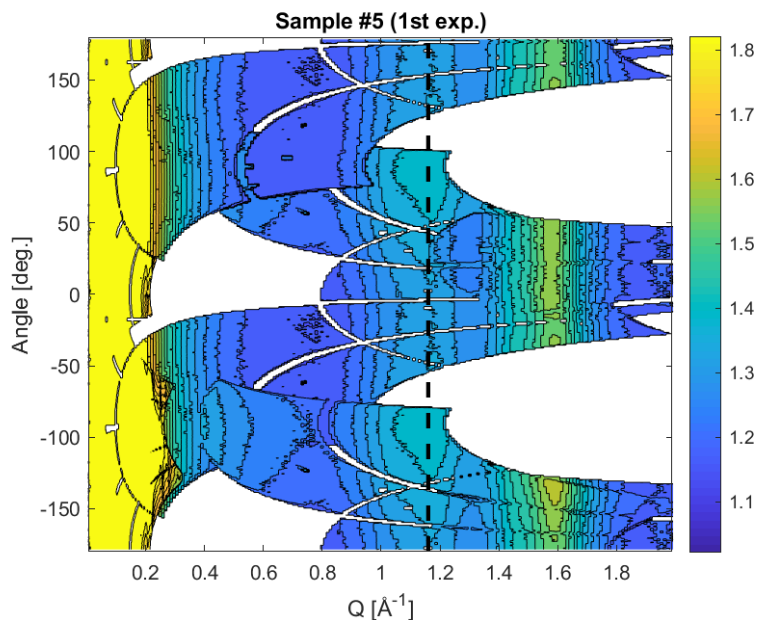

Note that this mirror-correction does not lead to a perfect matching owing to differences in the intensity due to slight detector tilt. The orientation distribution is evaluated at the location of the (110)-peak at  $q = 1.16 \text{ \AA}^{-1}$  (thick dashed black line; note that the data at this  $q$ -value is only taken from one detector, *i.e.* WAXD-detector 1):

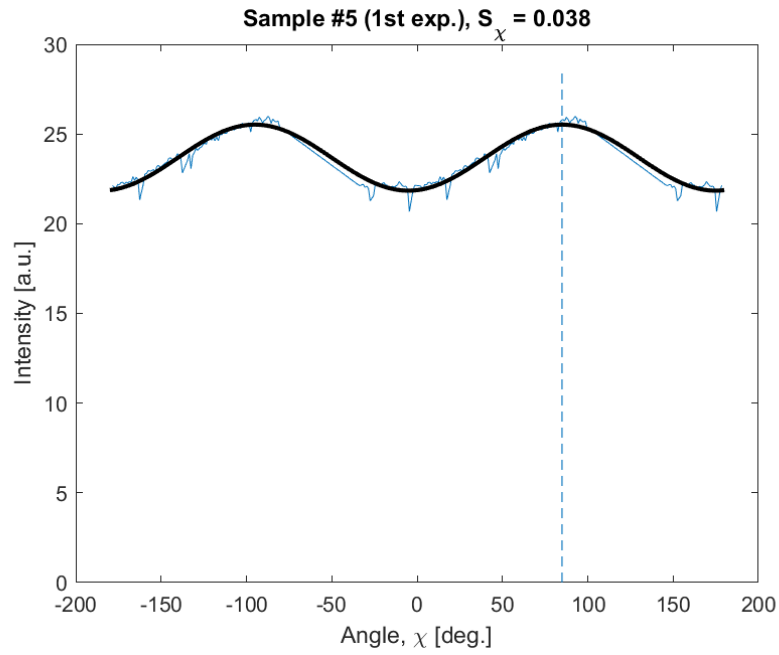

The raw intensity  $I(\chi)$  is fitted to a function of form:

$$I_{fit}(\chi) = A \cos(2(\chi - \chi_{tilt})) + B,$$

where  $\chi_{tilt}$  indicates the tilt angle (dashed blue line in figure). The order parameter  $S_\chi$  is calculated through:

$$S_\chi = \int_{-180^\circ}^{180^\circ} I_{fit}(\chi) (2 \cos^2(\chi - \chi_{tilt}) - 1) d\chi,$$

Where  $I_{fit}(\chi)$  initially is normalized according to:

$$1 = \int_{-180^\circ}^{180^\circ} I_{fit}(\chi) d\chi.$$

## Results:

The order parameter of all samples in the study are presented in the table below. Note that every sample was measured in two separate experiments (at different locations).

| Sample # | $S_\chi$ (1 <sup>st</sup> exp.) | $S_\chi$ (2 <sup>nd</sup> exp.) |
|----------|---------------------------------|---------------------------------|
| 1        | 0.023                           | 0.014                           |
| 2        | 0.029                           | 0.022                           |
| 3        | 0.008                           | 0.016                           |
| 4        | 0.016                           | 0.042                           |
| 5        | 0.038                           | 0.020                           |
| 6        | 0.007                           | 0.009                           |
| 7        | 0.002                           | 0.039                           |
| 8        | 0.027                           | 0.024                           |
| 9        | 0.014                           | 0.016                           |
| 10       | 0.006                           | 0.011                           |
| 11       | 0.018                           | 0.051                           |
| 12       | 0.016                           | 0.029                           |
| 13       | 0.025                           | 0.025                           |
| 14       | 0.008                           | 0.046                           |
| 15       | 0.015                           | 0.015                           |
| 16       | 0.032                           | 0.037                           |
| 17       | 0.012                           | 0.018                           |
| 18       | 0.004                           | 0.008                           |

Since all the samples have an order parameter that fulfill  $S_\chi \ll 0.1$ , we can safely assume the samples to be isotropic.

## **WAXD simulations: Results**

**Form factor of a CNF chain with semi-axes**

**1 Å x 1 Å**

Model: H1+

Aggregation direction: (1-10)

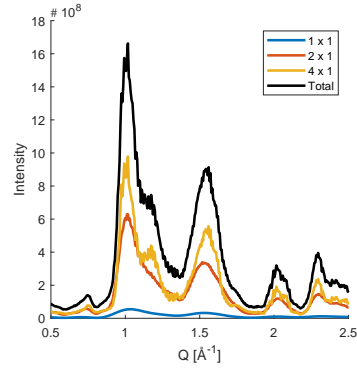

Sample #1

Vol% 1x1: 4.7

Vol% 2x1: 42.3

Vol% 4x1: 53.0

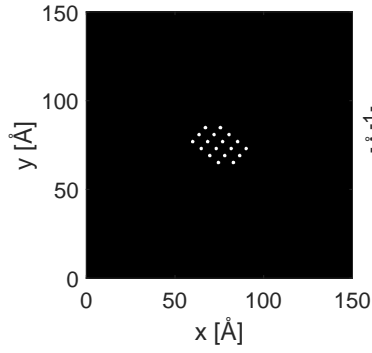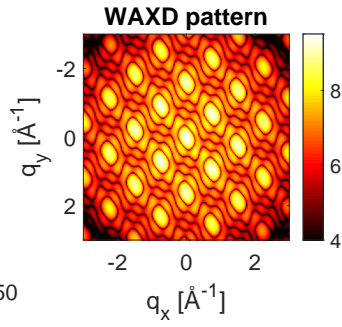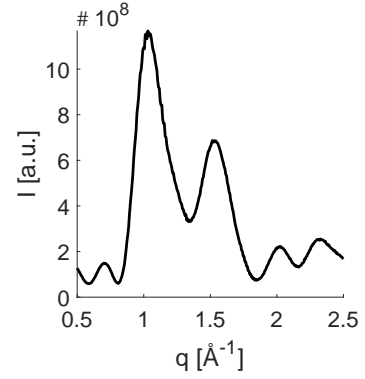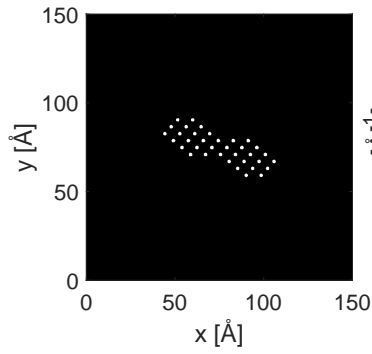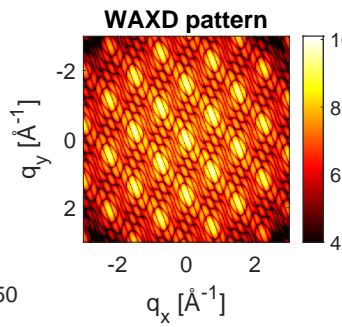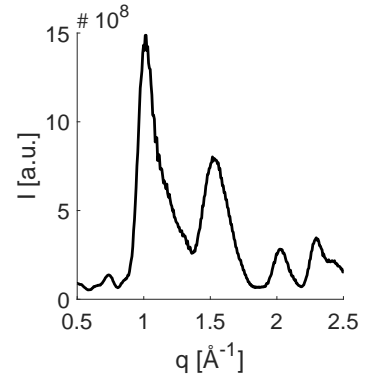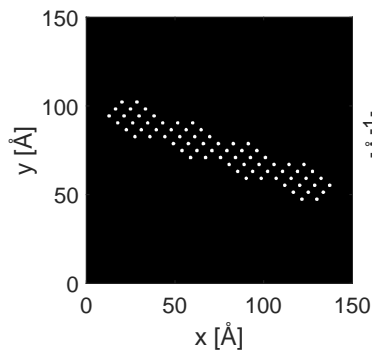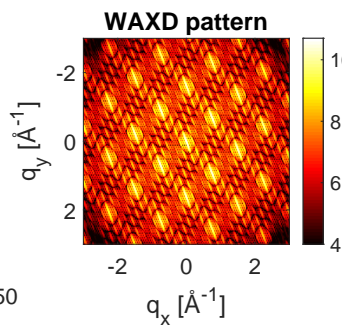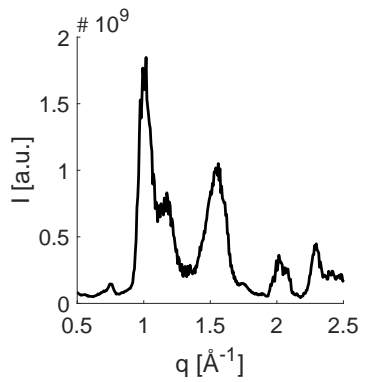

Model: H1+

Aggregation direction: (110)

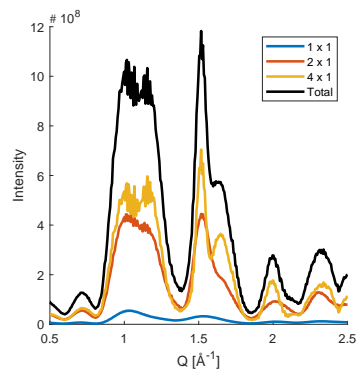

Sample #1

Vol% 1x1: 4.7

Vol% 2x1: 42.3

Vol% 4x1: 53.0

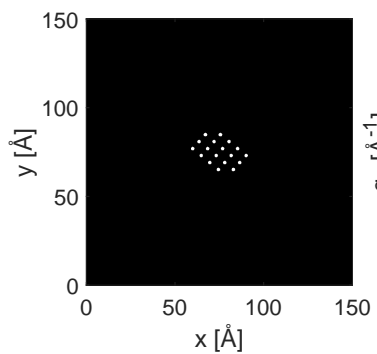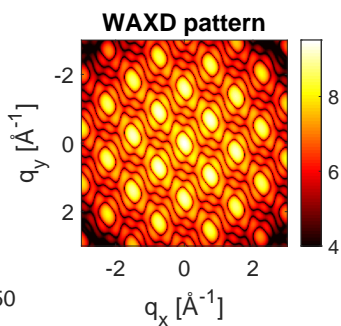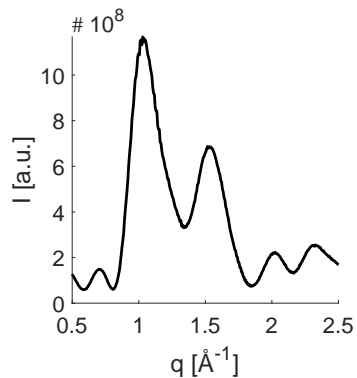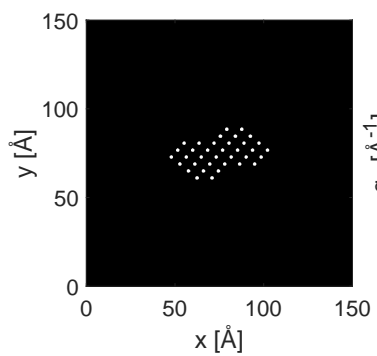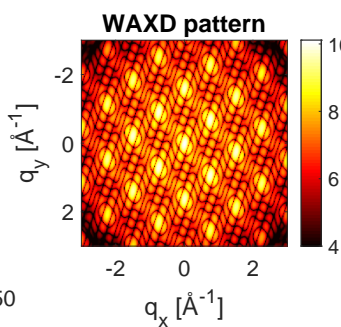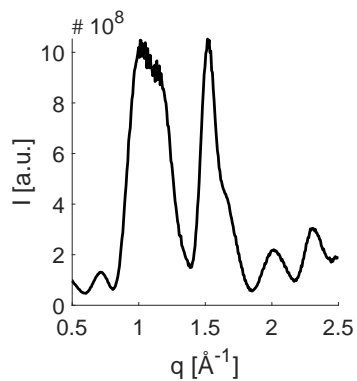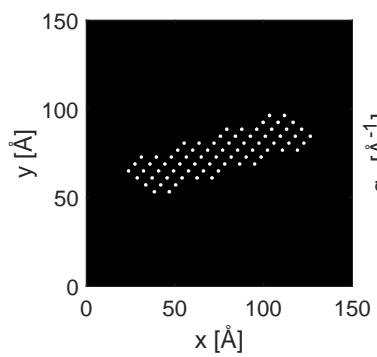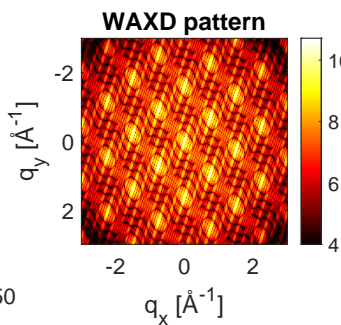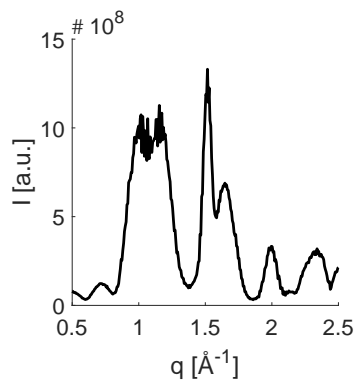



Model: H1+

Aggregation direction: (200)

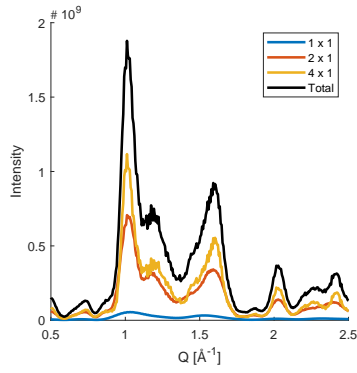

Sample #1

Vol% 1x1: 4.7

Vol% 2x1: 42.3

Vol% 4x1: 53.0

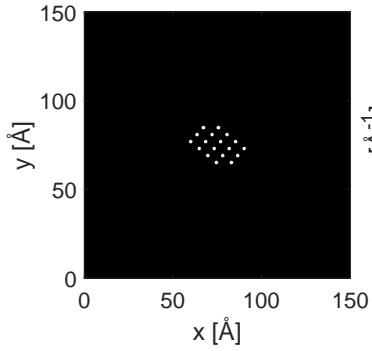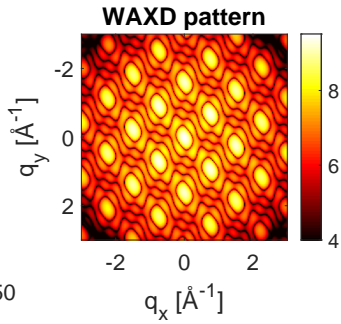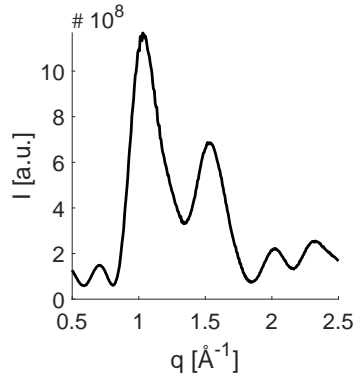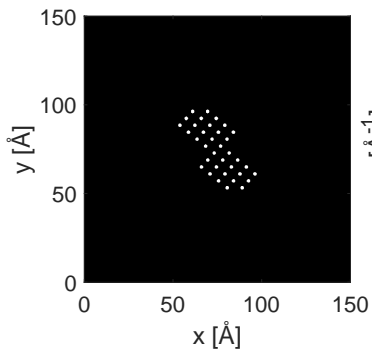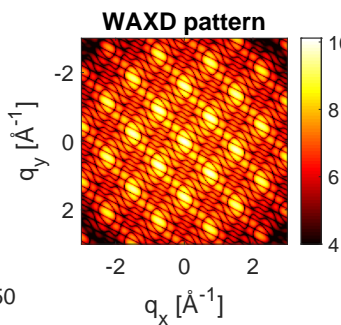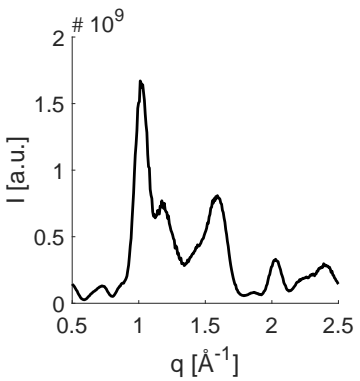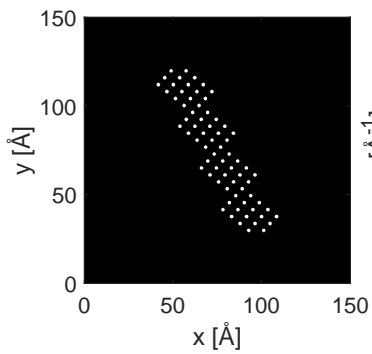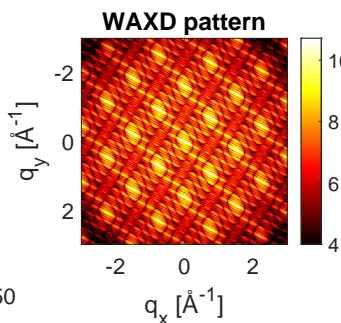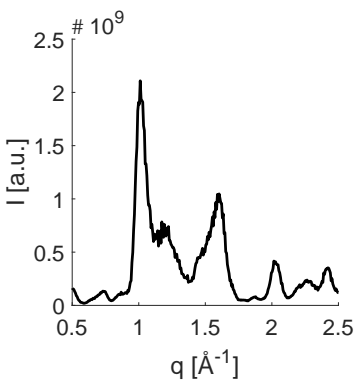

Model: H1-

Aggregation direction: (1-10)

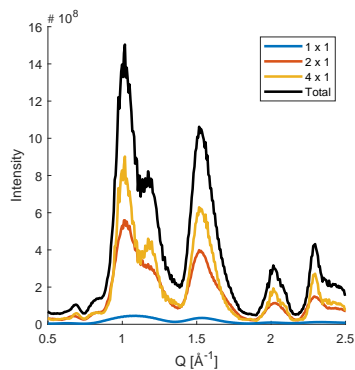

Sample #1

Vol% 1x1: 4.7

Vol% 2x1: 42.3

Vol% 4x1: 53.0

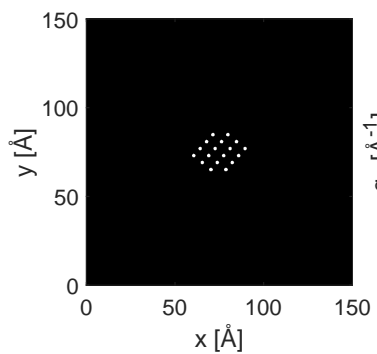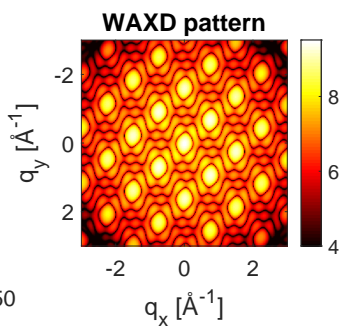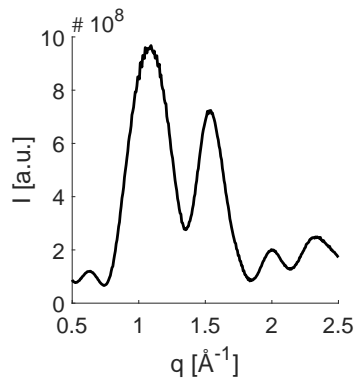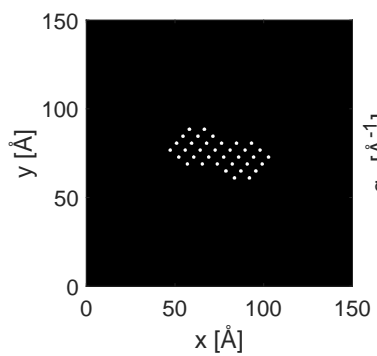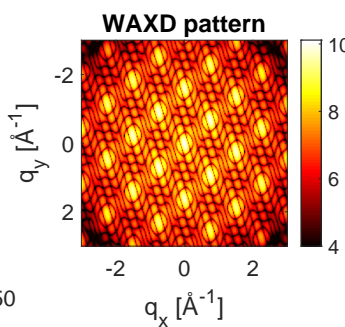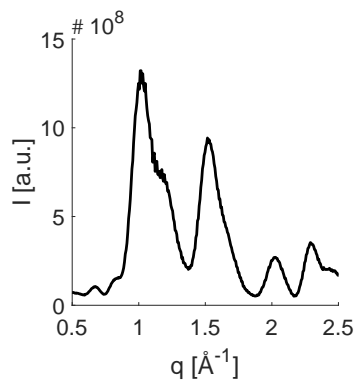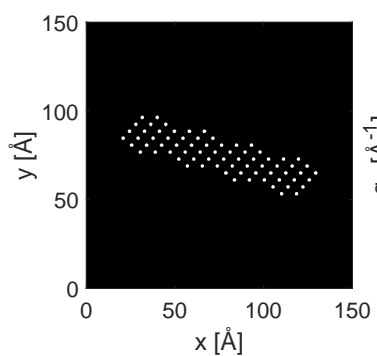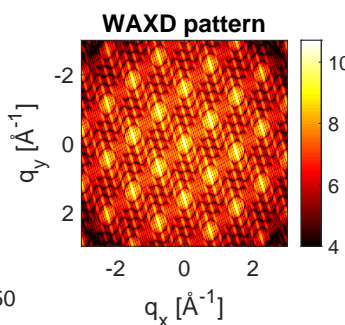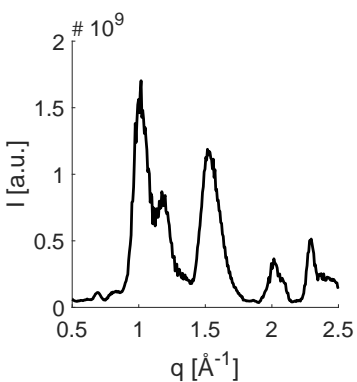

Model: H1-

Aggregation direction: (110)

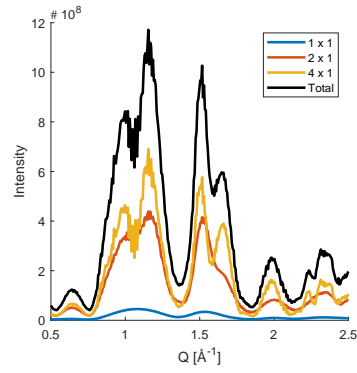

Sample #1

Vol% 1x1: 4.7

Vol% 2x1: 42.3

Vol% 4x1: 53.0

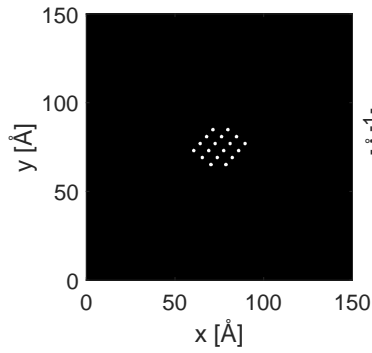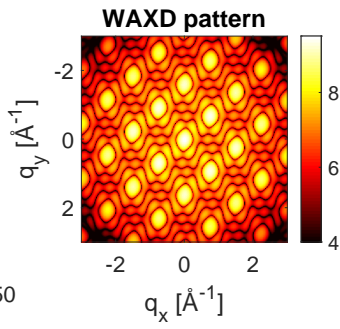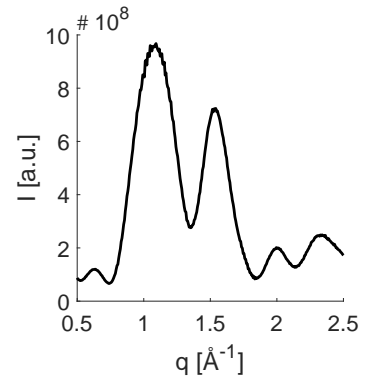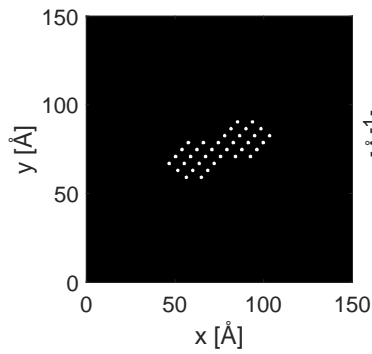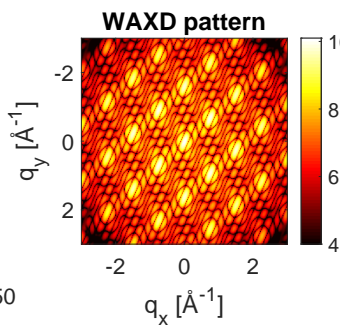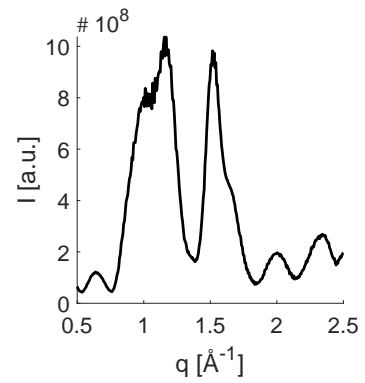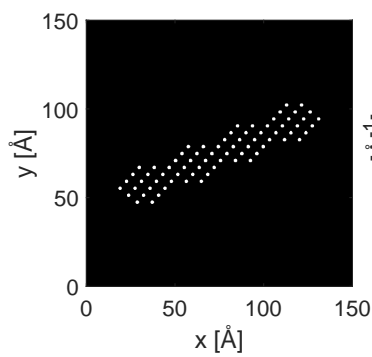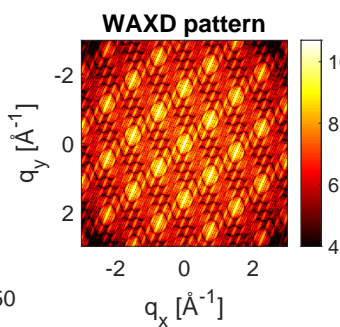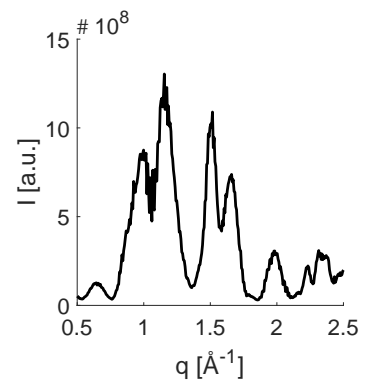

Model: H1-

Aggregation direction: (200)

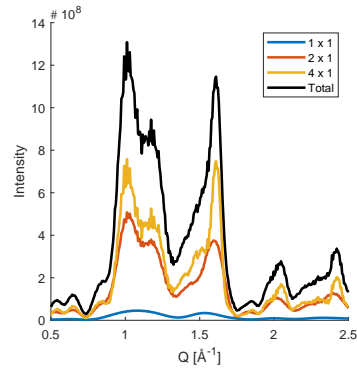

Sample #1

Vol% 1x1: 4.7

Vol% 2x1: 42.3

Vol% 4x1: 53.0

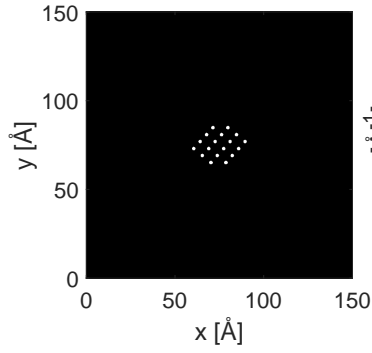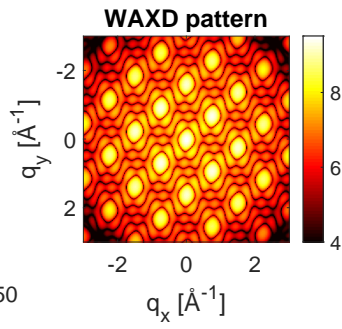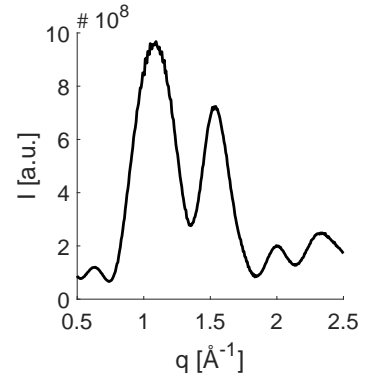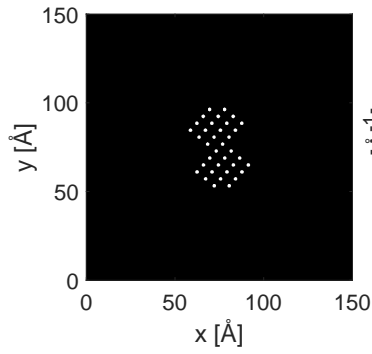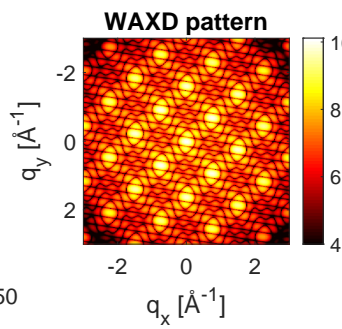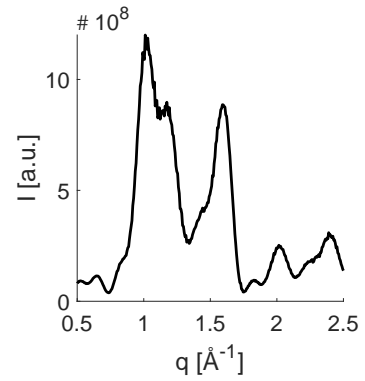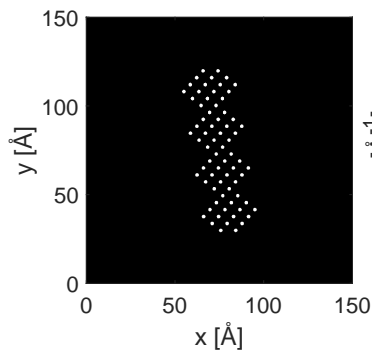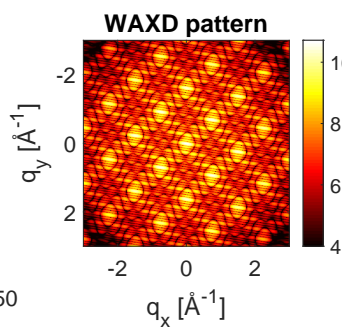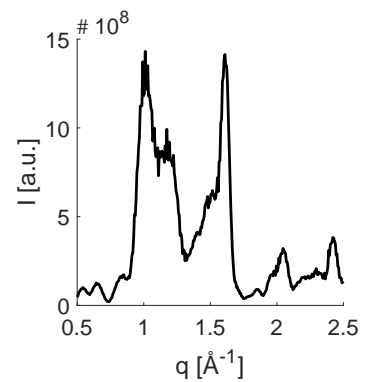

Model: H2+

Aggregation direction: (1-10)

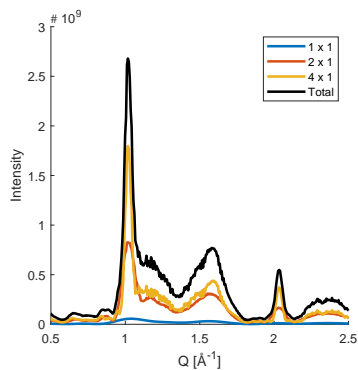

Sample #1

Vol% 1x1: 4.7

Vol% 2x1: 42.3

Vol% 4x1: 53.0

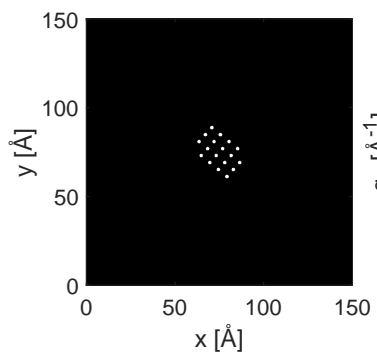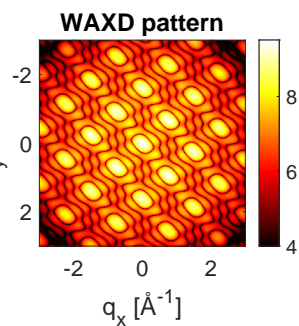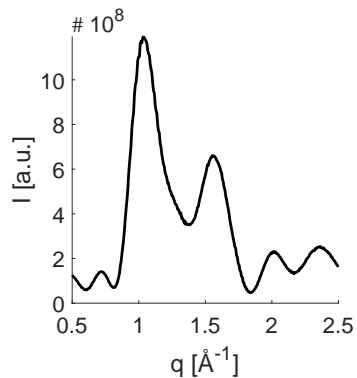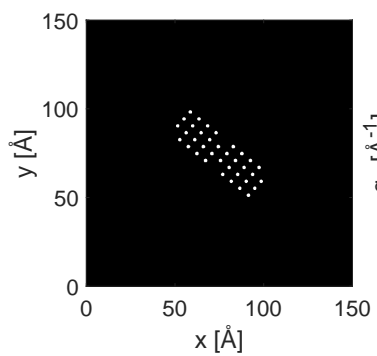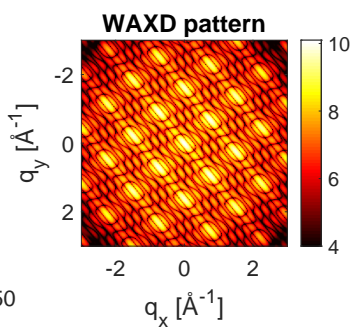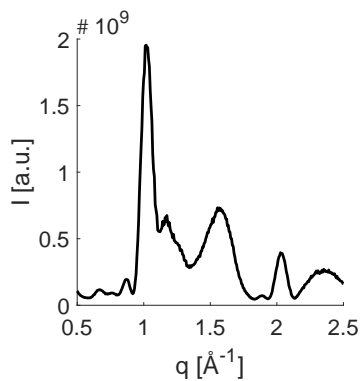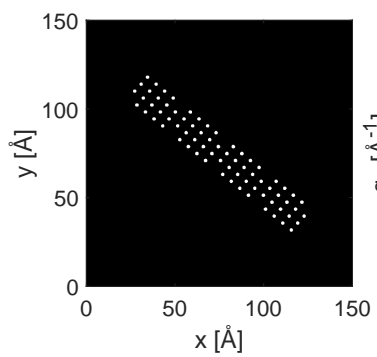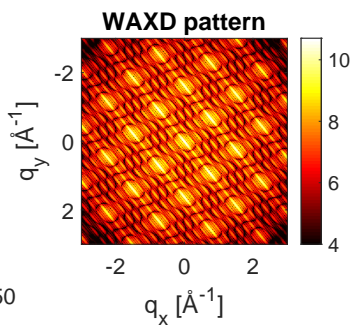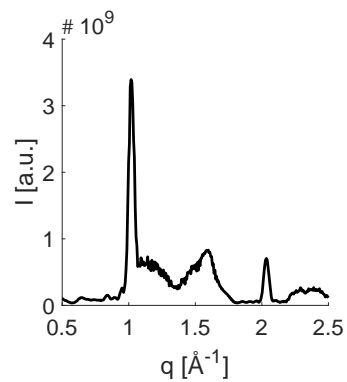

Model: H2+

Aggregation direction: (110)

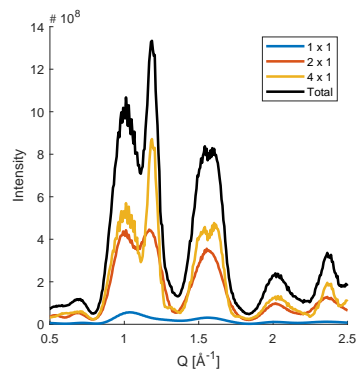

Sample #1

Vol% 1x1: 4.7

Vol% 2x1: 42.3

Vol% 4x1: 53.0

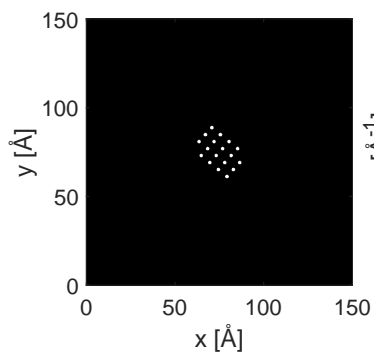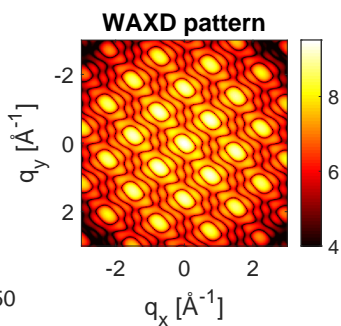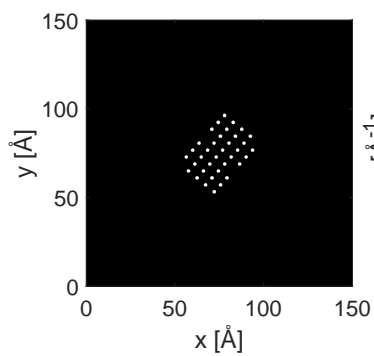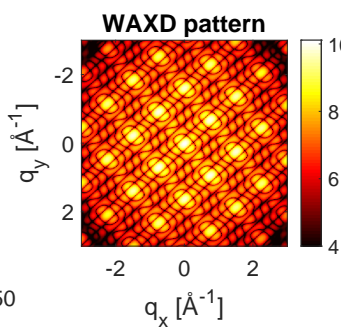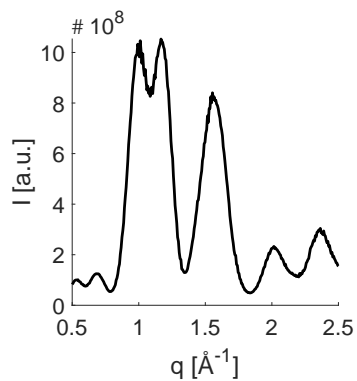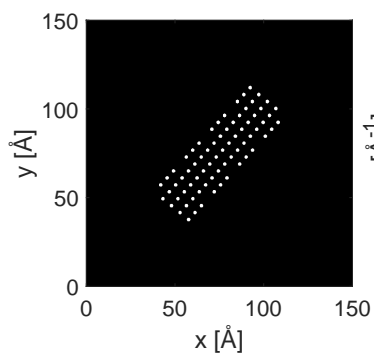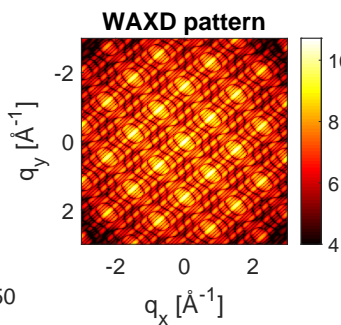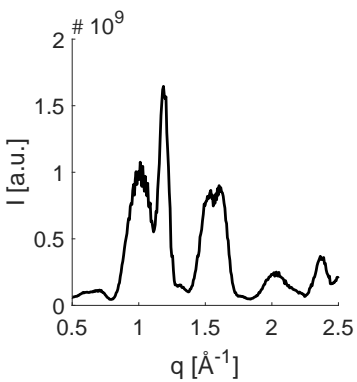

Model: H2-  
 Aggregation direction: (1-10)

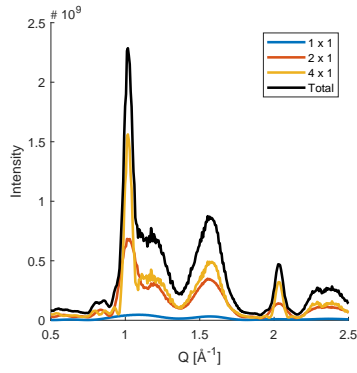

Sample #1  
 Vol% 1x1: 4.7  
 Vol% 2x1: 42.3  
 Vol% 4x1: 53.0

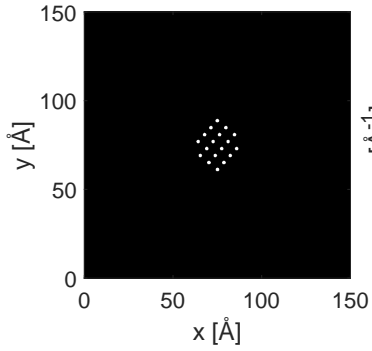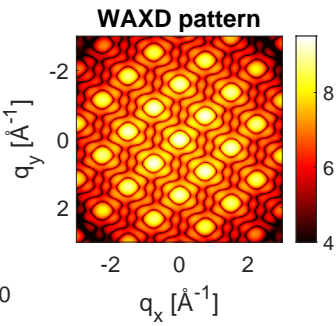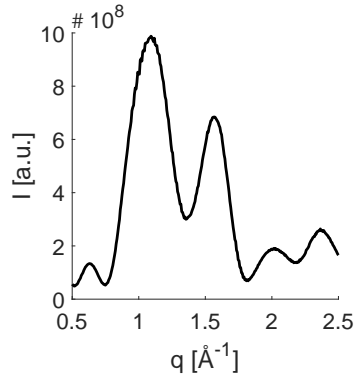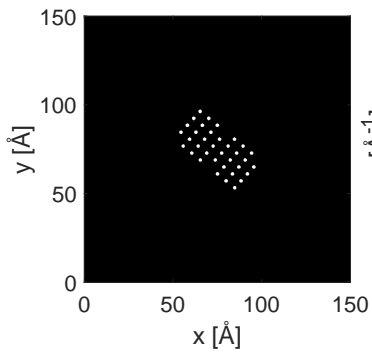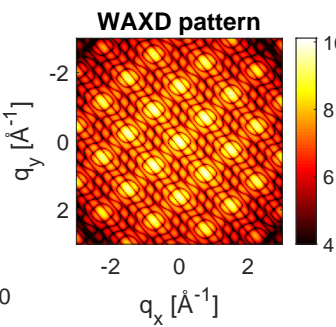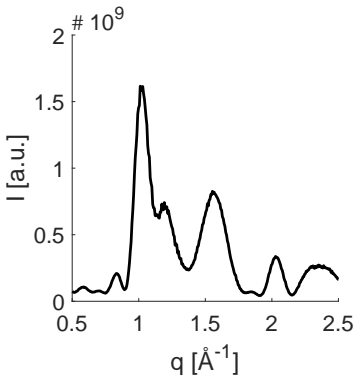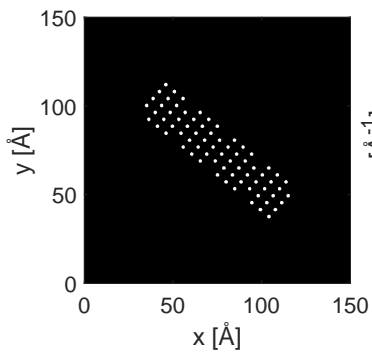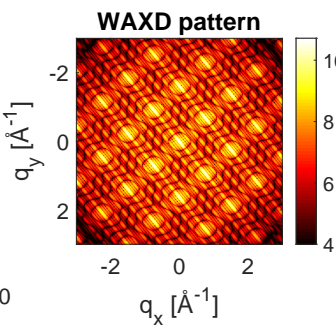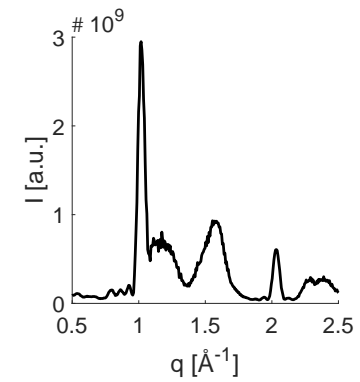

Model: H2-

Aggregation direction: (110)

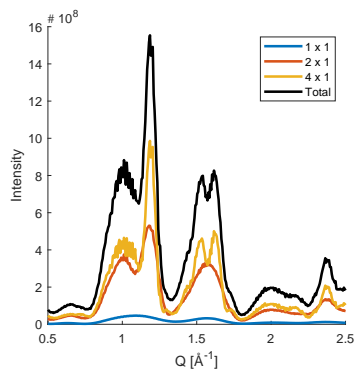

Sample #1

Vol% 1x1: 4.7

Vol% 2x1: 42.3

Vol% 4x1: 53.0

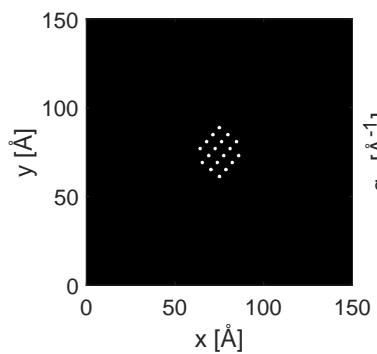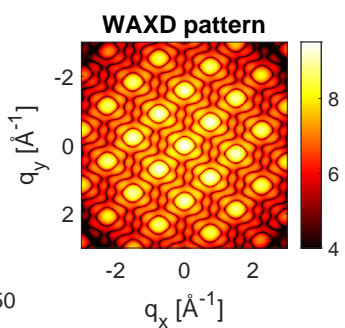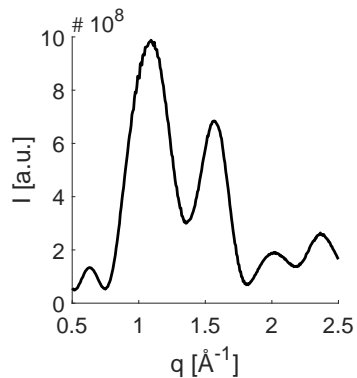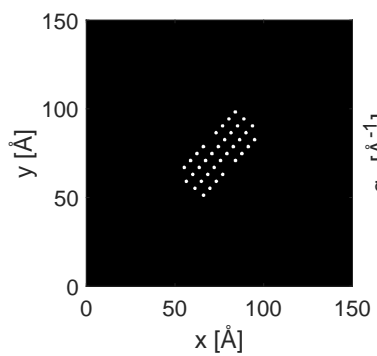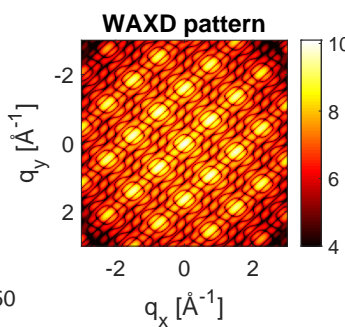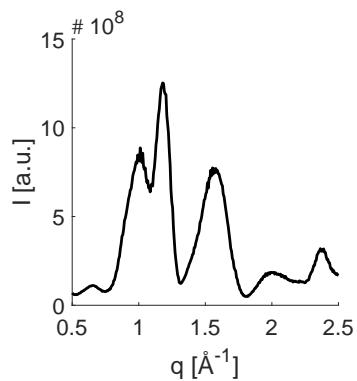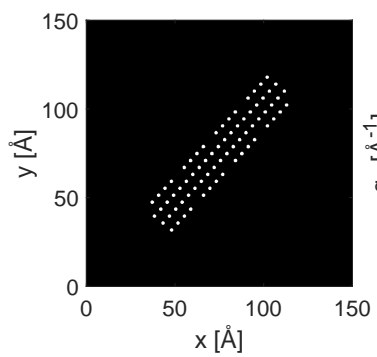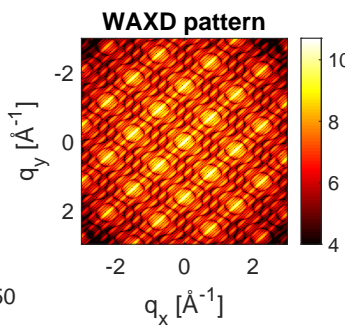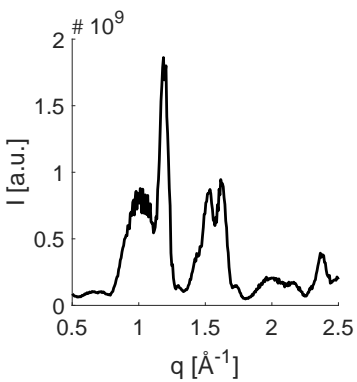



Model: R1+  
Aggregation direction: (1-10)

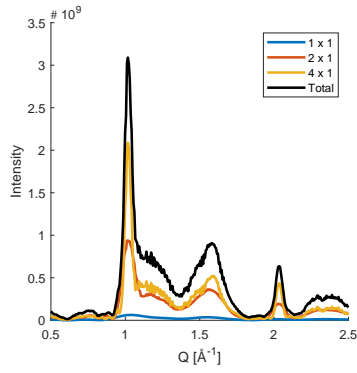

Sample #1  
Vol% 1x1: 4.7  
Vol% 2x1: 42.3  
Vol% 4x1: 53.0

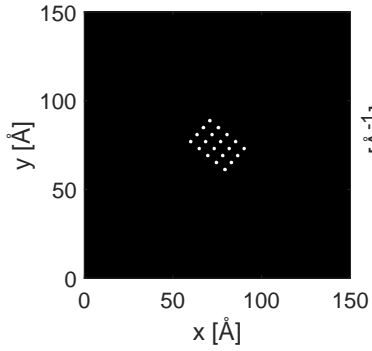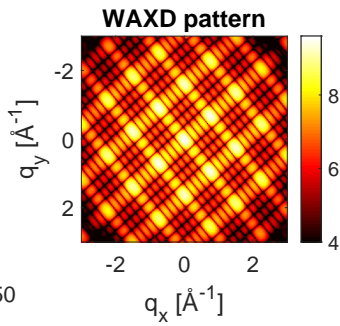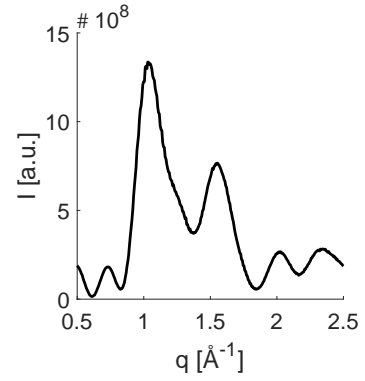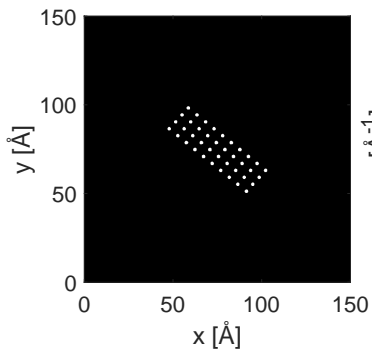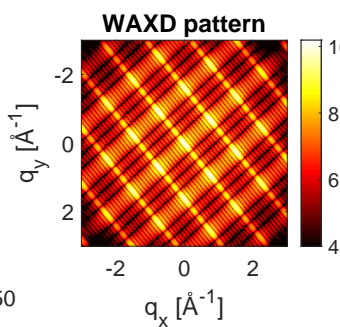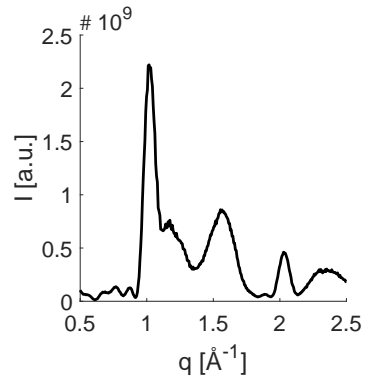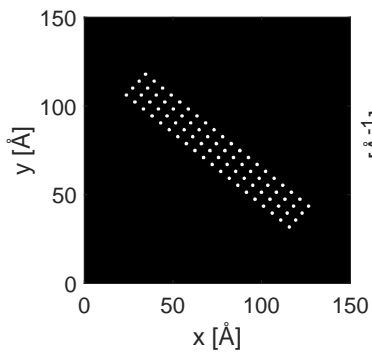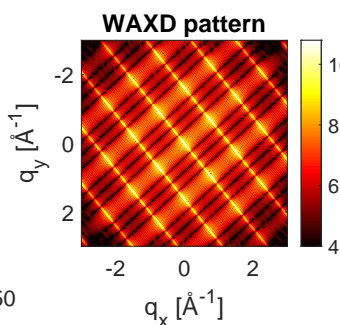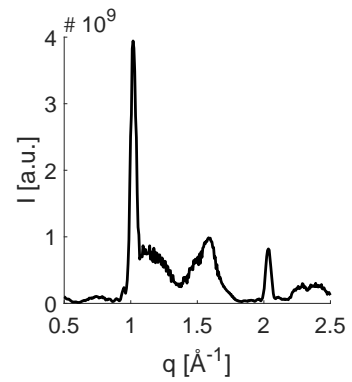

Model: R1+

Aggregation direction: (110)

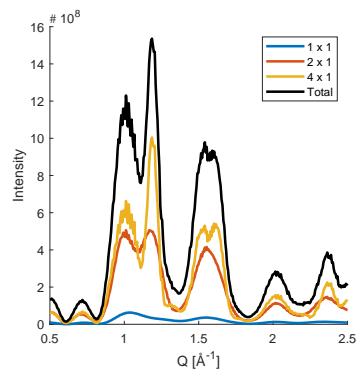

Sample #1

Vol% 1x1: 4.7

Vol% 2x1: 42.3

Vol% 4x1: 53.0

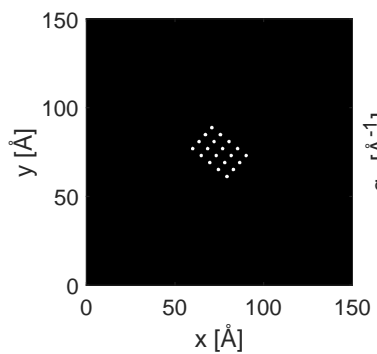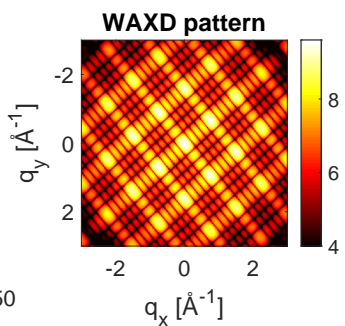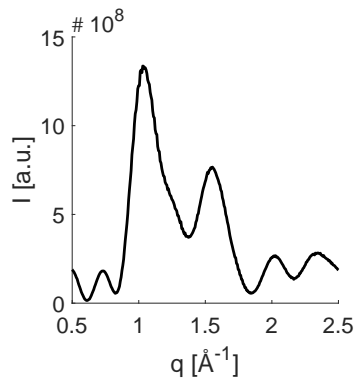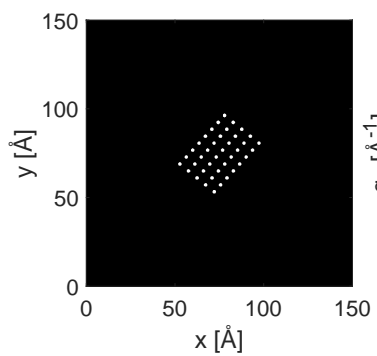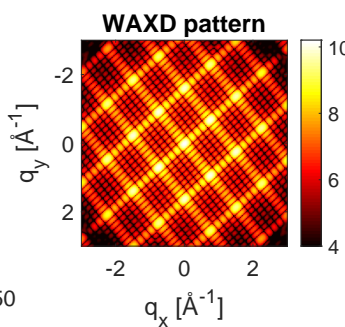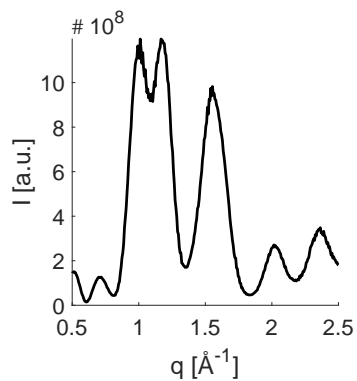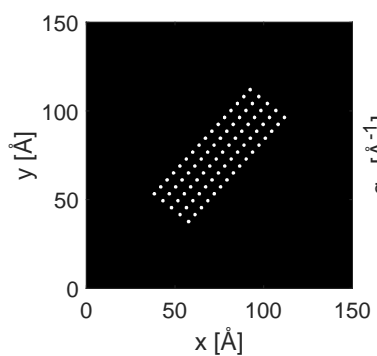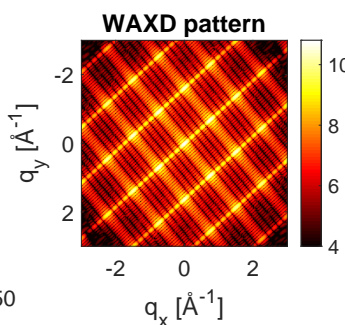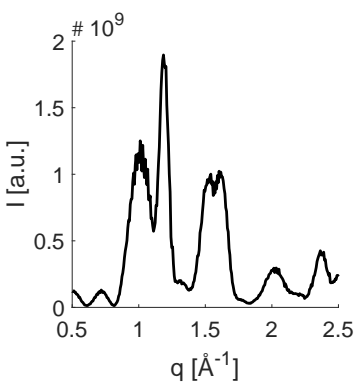

Model: R1-

Aggregation direction: (1-10)

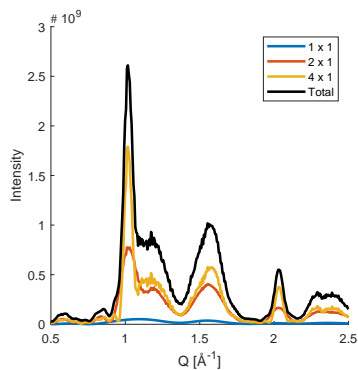

Sample #1

Vol% 1x1: 4.7

Vol% 2x1: 42.3

Vol% 4x1: 53.0

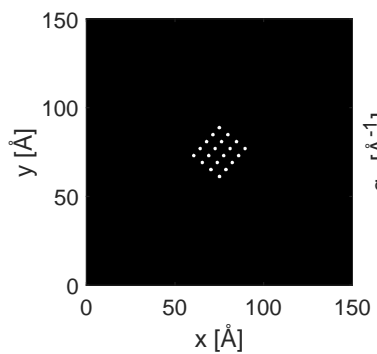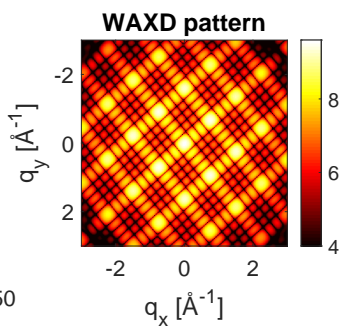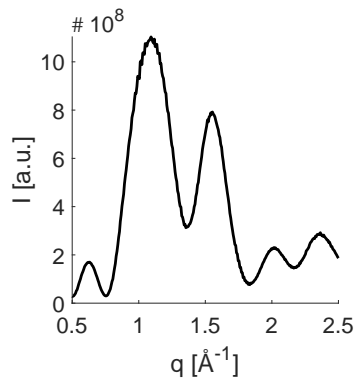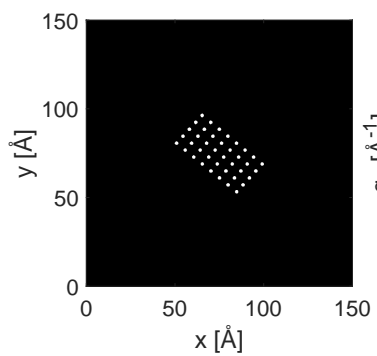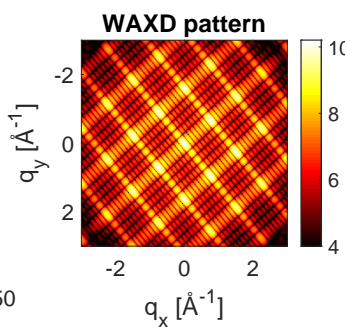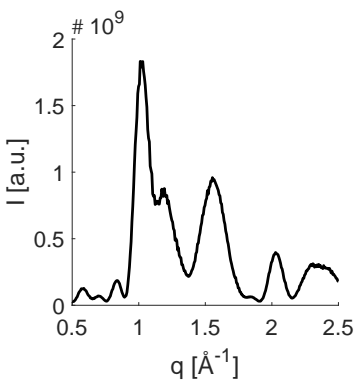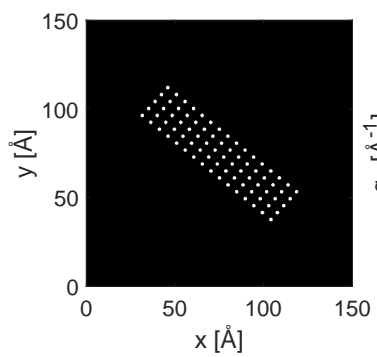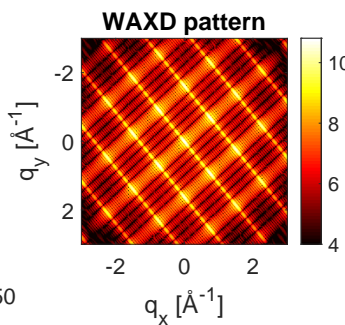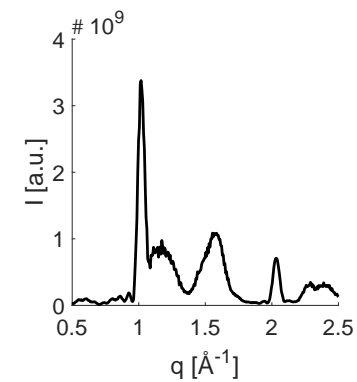

Model: R1-

Aggregation direction: (110)

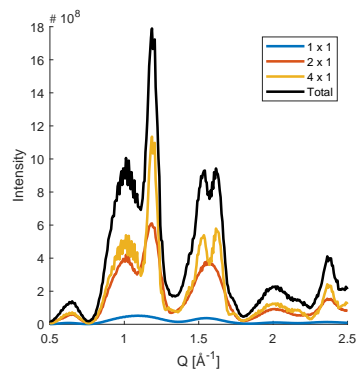

Sample #1

Vol% 1x1: 4.7

Vol% 2x1: 42.3

Vol% 4x1: 53.0

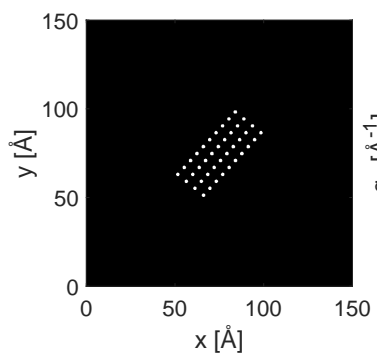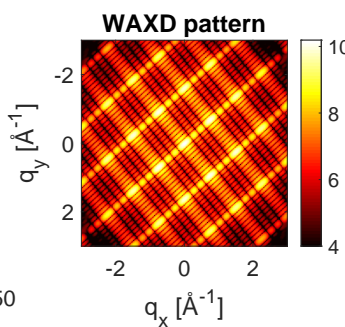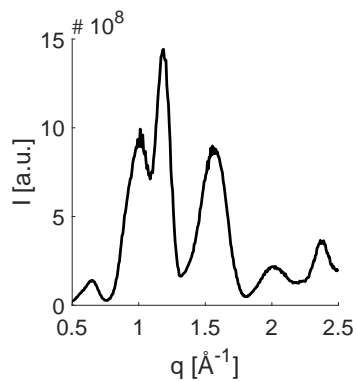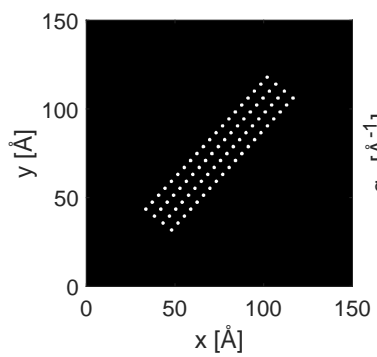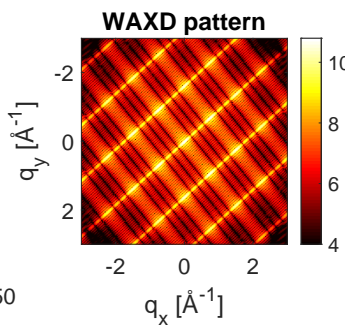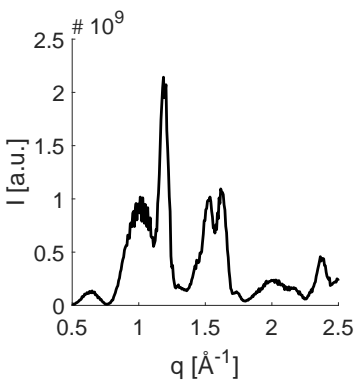

Model: R2+  
Aggregation direction: (1-10)

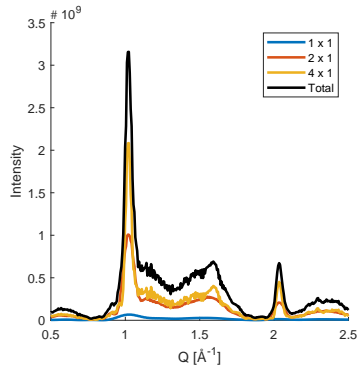

Sample #1  
Vol% 1x1: 4.7  
Vol% 2x1: 42.3  
Vol% 4x1: 53.0

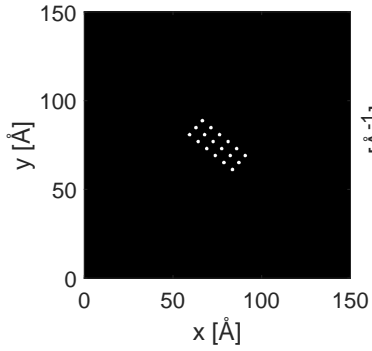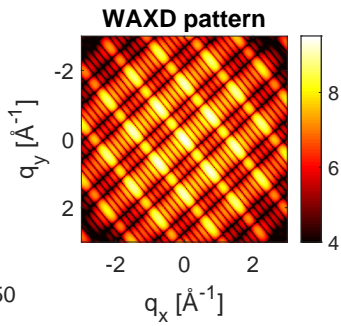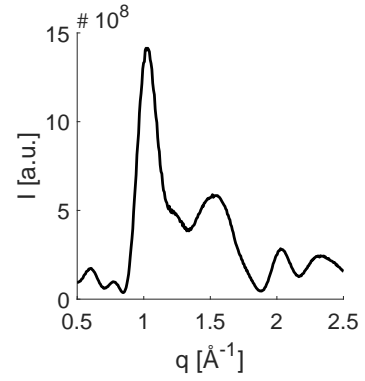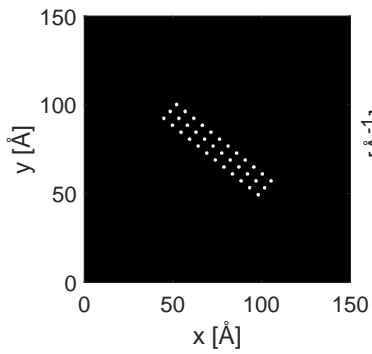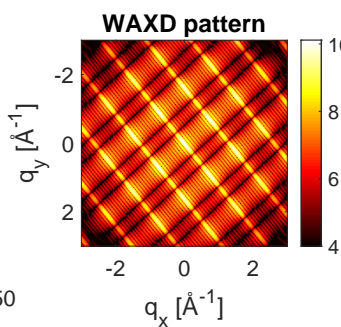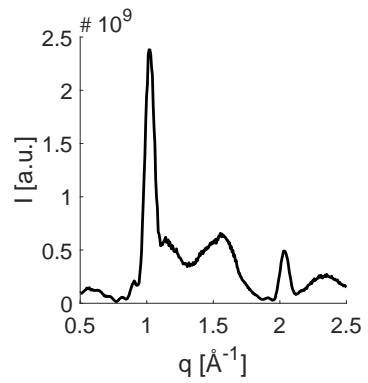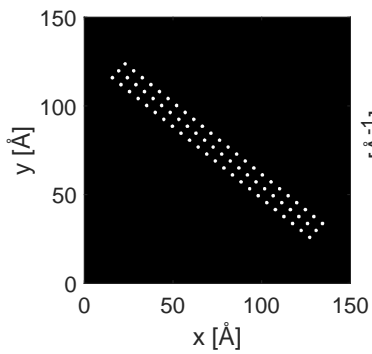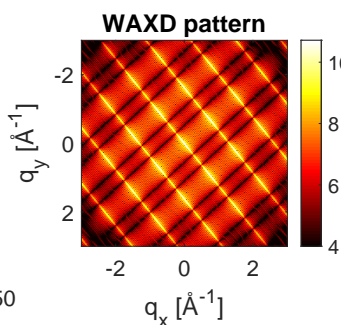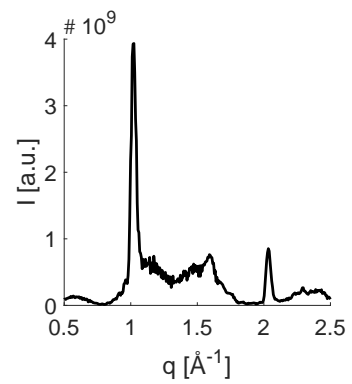

Model: R2+

Aggregation direction: (110)

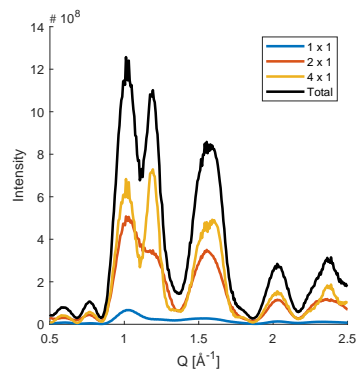

Sample #1

Vol% 1x1: 4.7

Vol% 2x1: 42.3

Vol% 4x1: 53.0

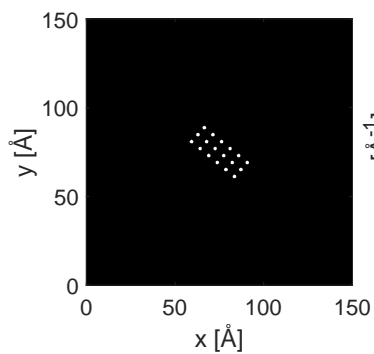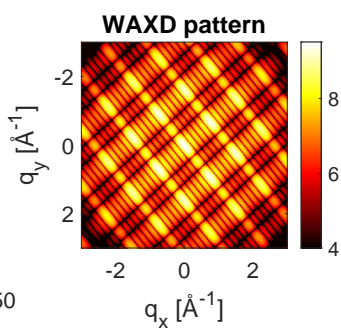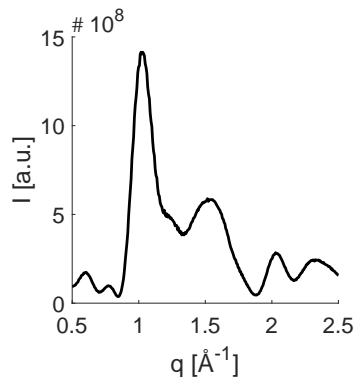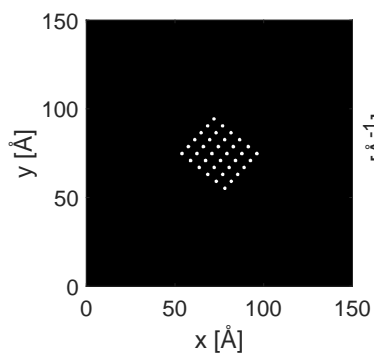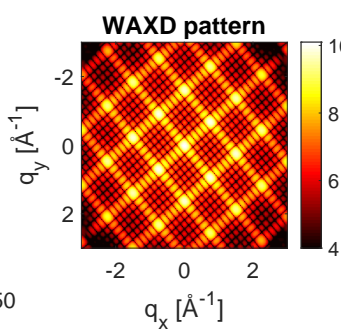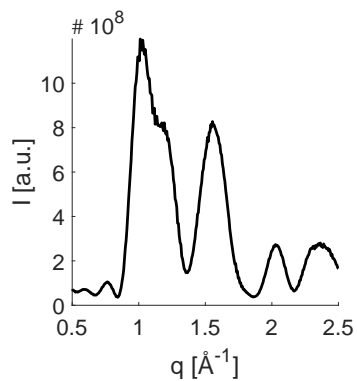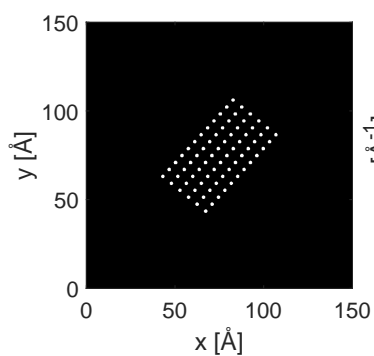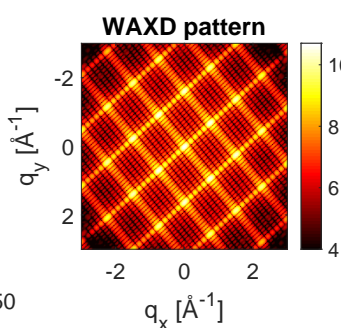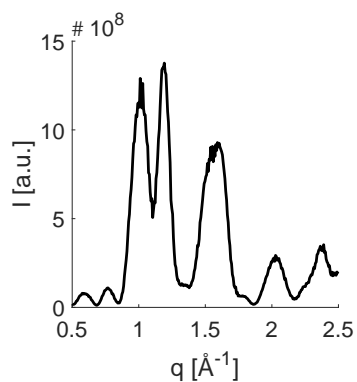

Model: R2-

Aggregation direction: (1-10)

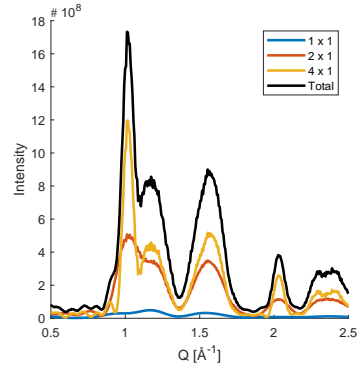

Sample #1

Vol% 1x1: 4.7

Vol% 2x1: 42.3

Vol% 4x1: 53.0

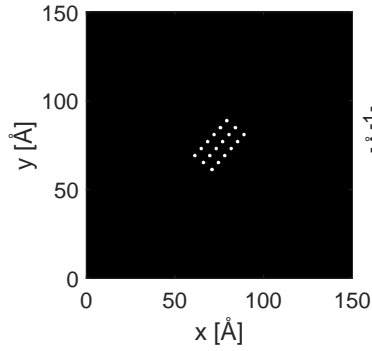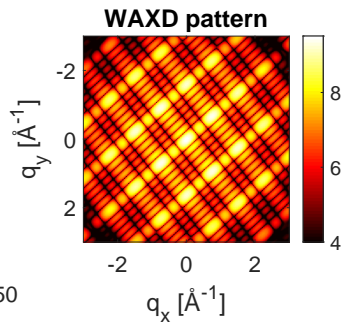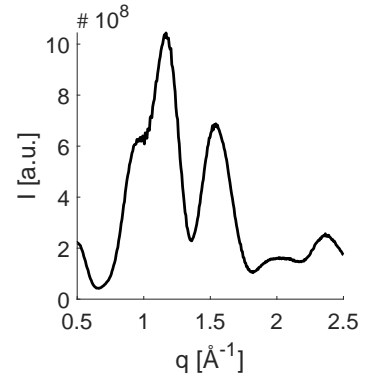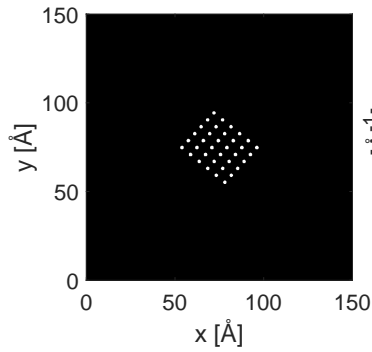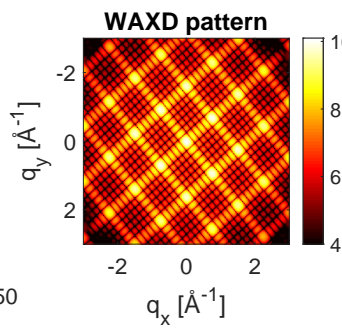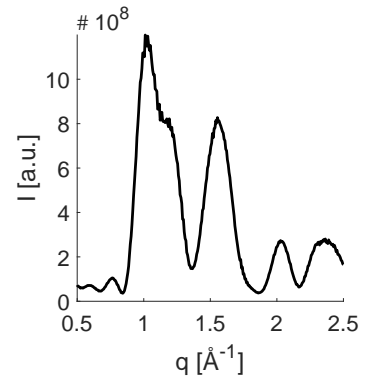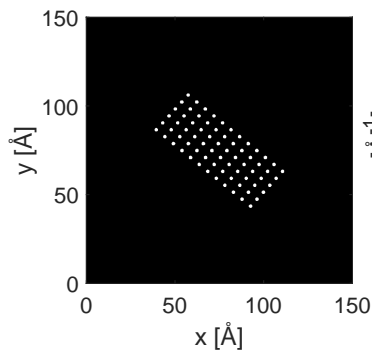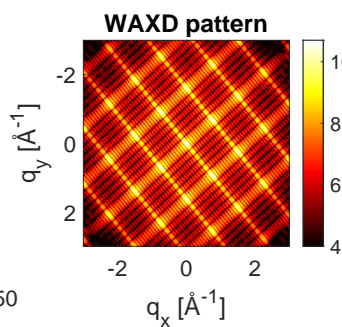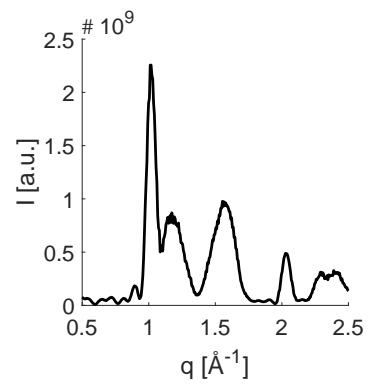

Model: R2-

Aggregation direction: (110)

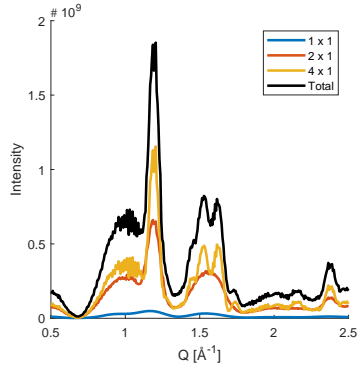

Sample #1

Vol% 1x1: 4.7

Vol% 2x1: 42.3

Vol% 4x1: 53.0

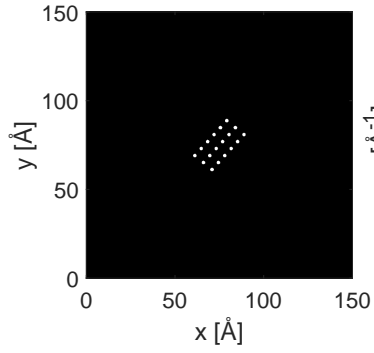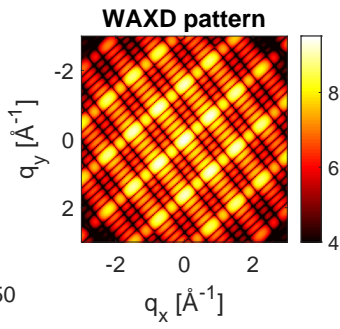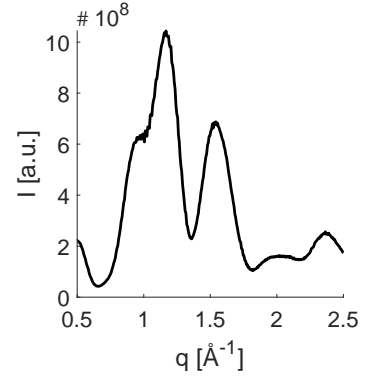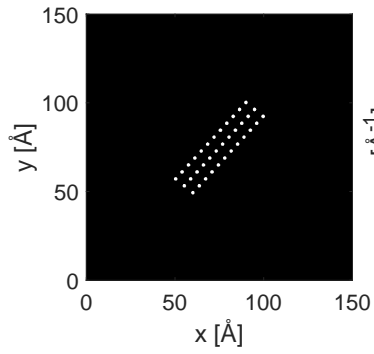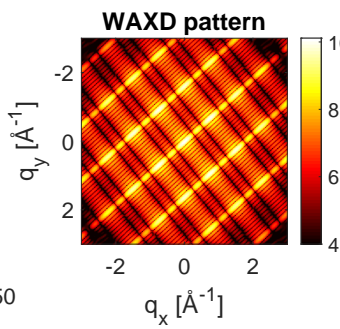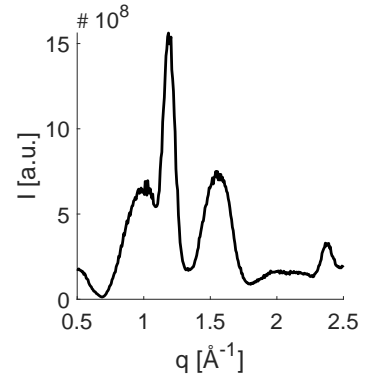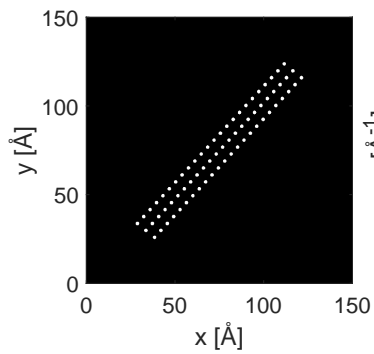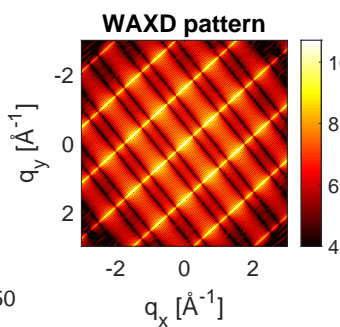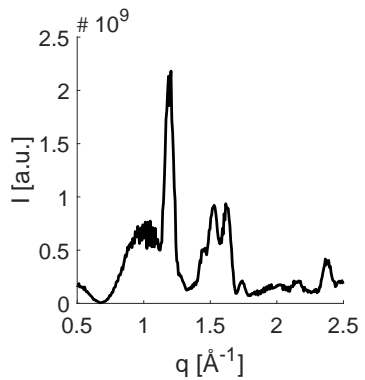



Model: Rh1+

Aggregation direction: (110)

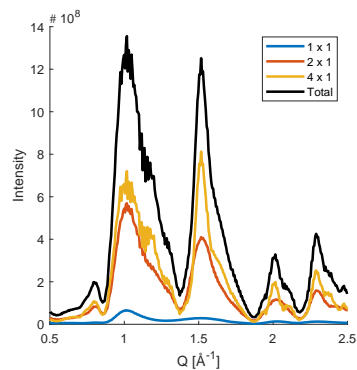

Sample #1

Vol% 1x1: 4.7

Vol% 2x1: 42.3

Vol% 4x1: 53.0

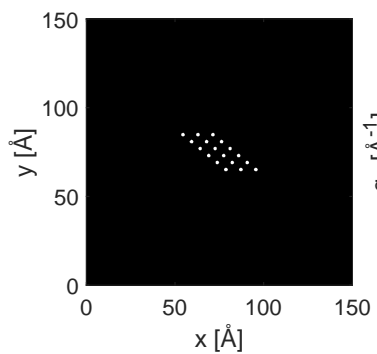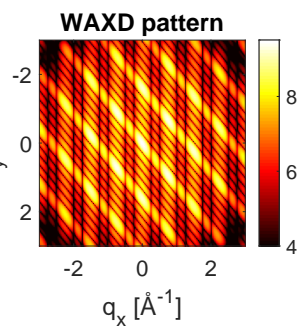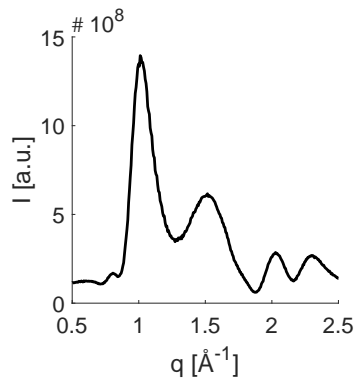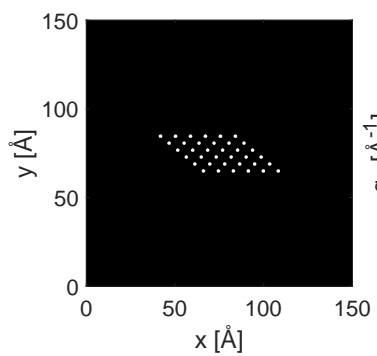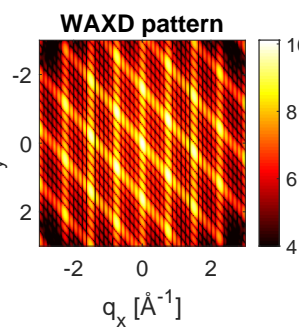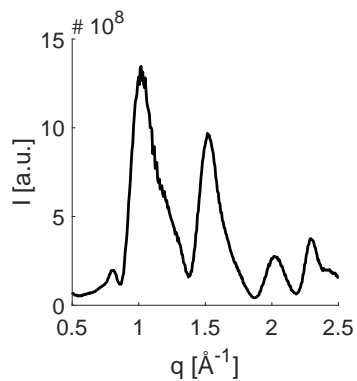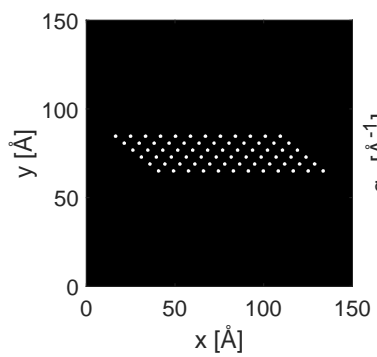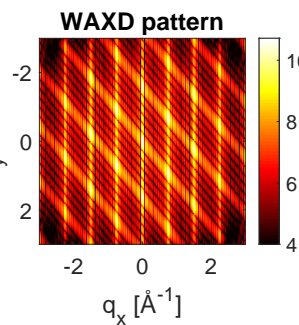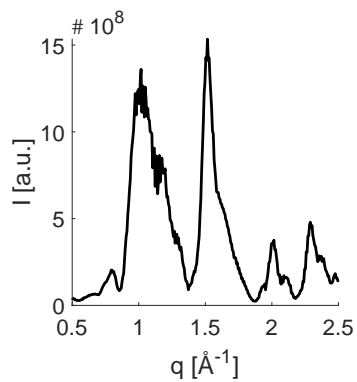

Model: Rh1+

Aggregation direction: (200)

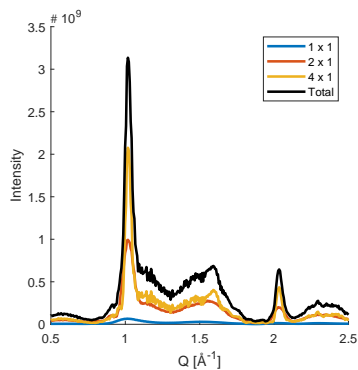

Sample #1

Vol% 1x1: 4.7

Vol% 2x1: 42.3

Vol% 4x1: 53.0

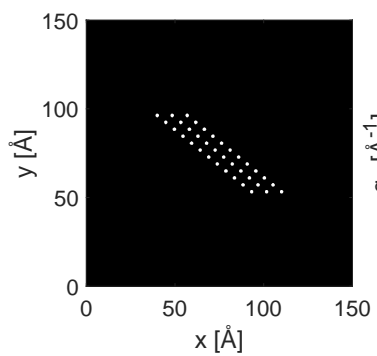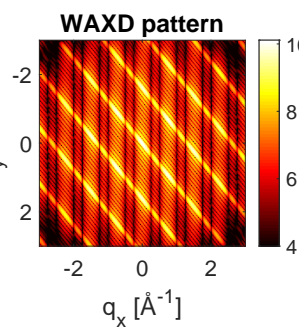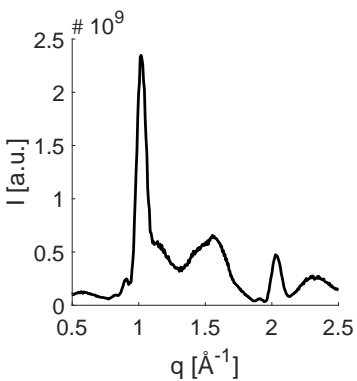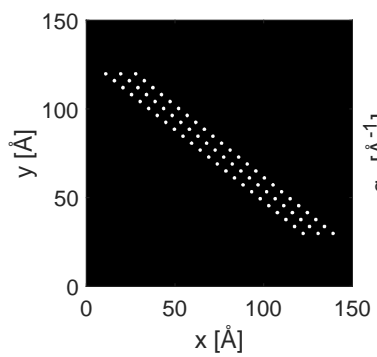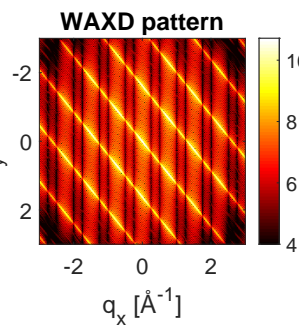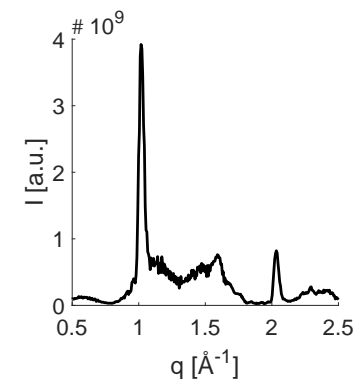

Model: Rh1-

Aggregation direction: (1-10)

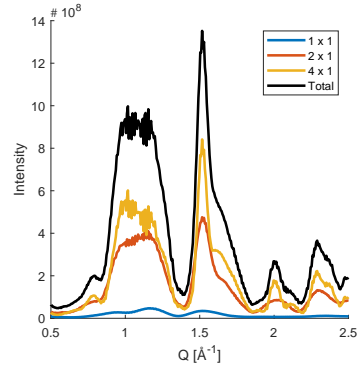

Sample #1

Vol% 1x1: 4.7

Vol% 2x1: 42.3

Vol% 4x1: 53.0

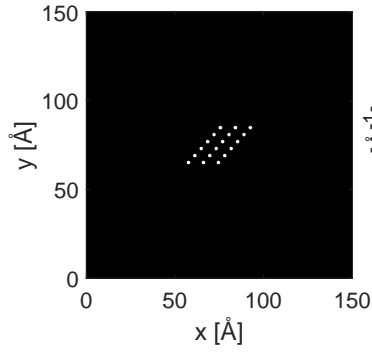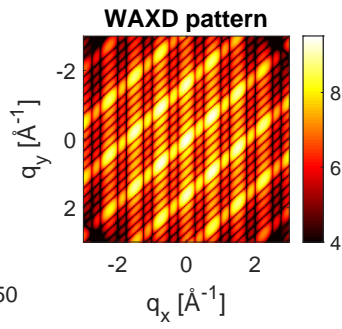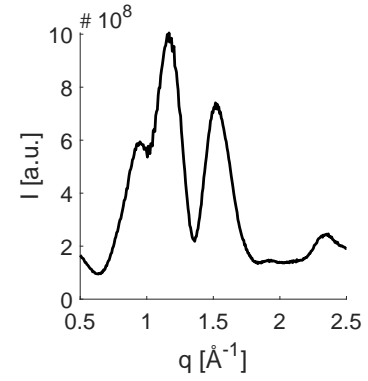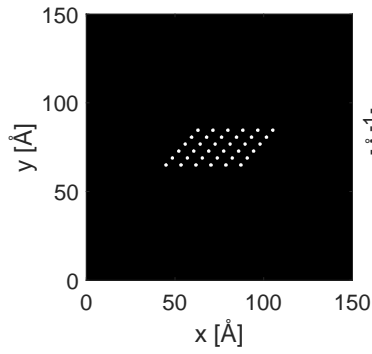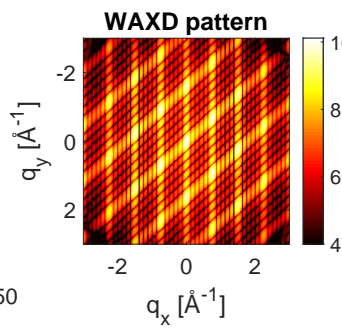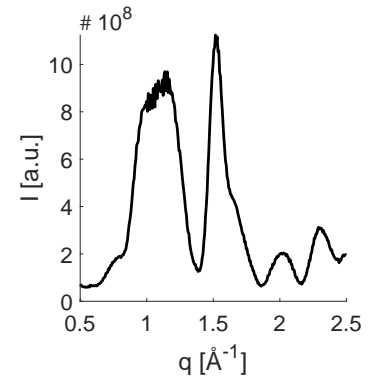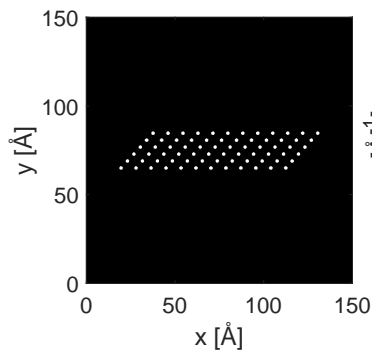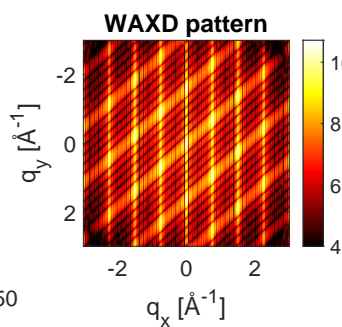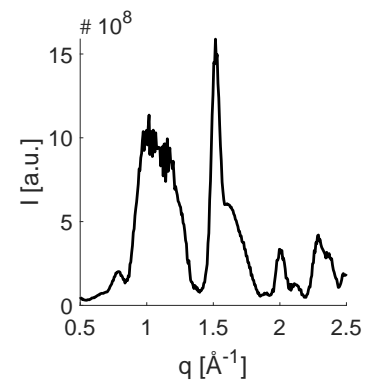

Model: Rh1-

Aggregation direction: (200)

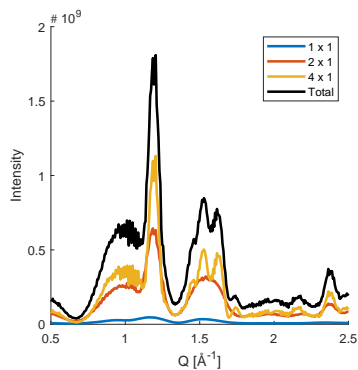

Sample #1

Vol% 1x1: 4.7

Vol% 2x1: 42.3

Vol% 4x1: 53.0

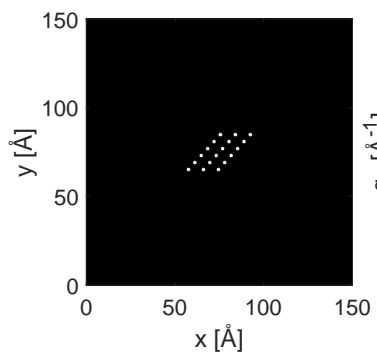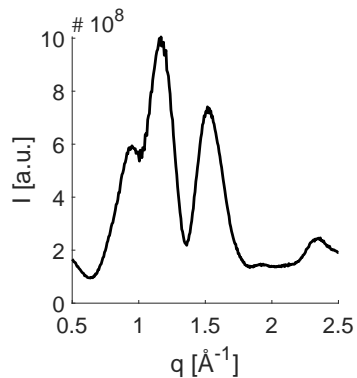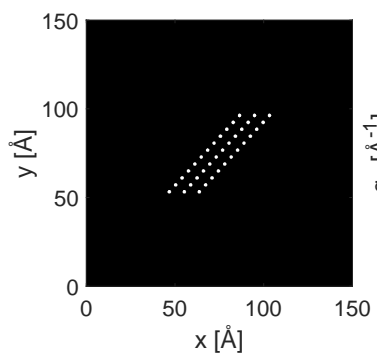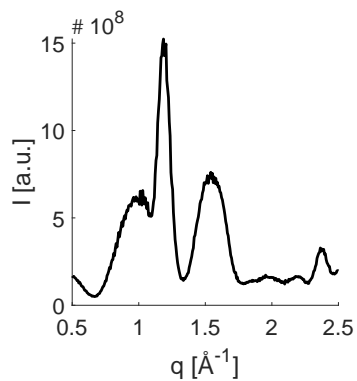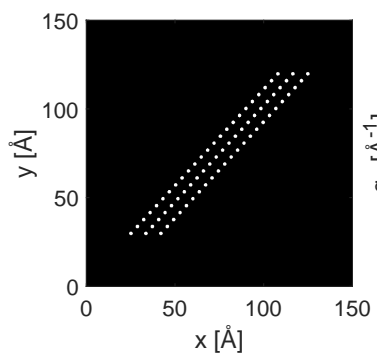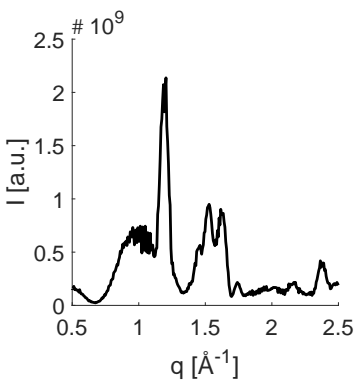

Model: Rh2

Aggregation direction: (010)

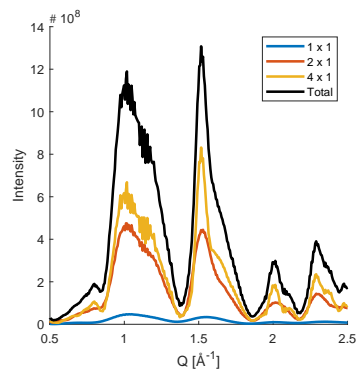

Sample #1

Vol% 1x1: 4.7

Vol% 2x1: 42.3

Vol% 4x1: 53.0

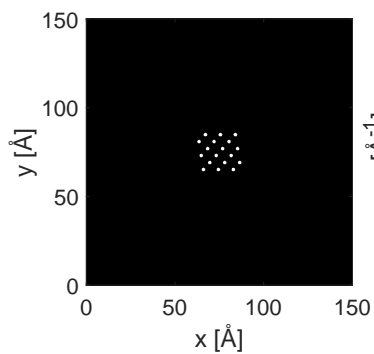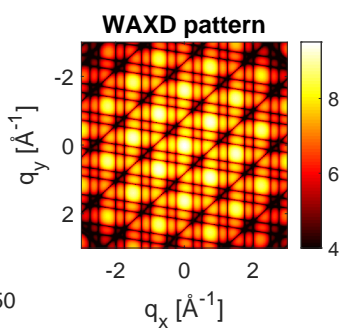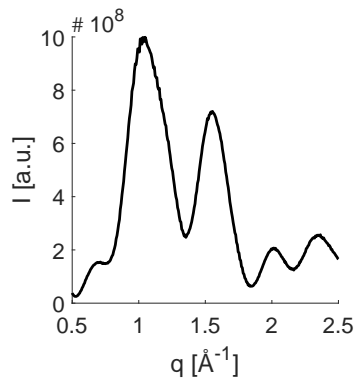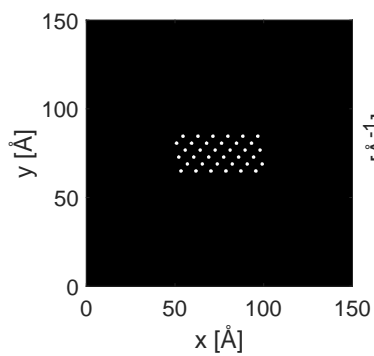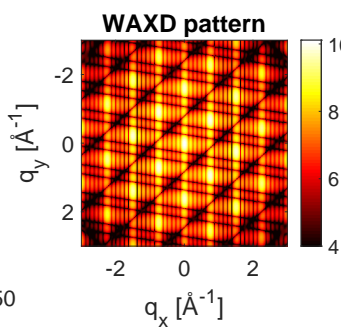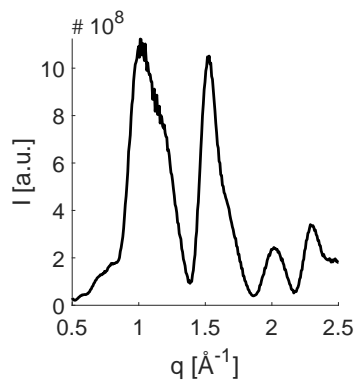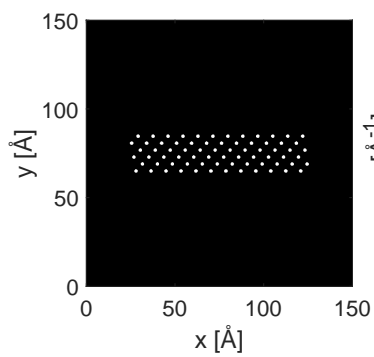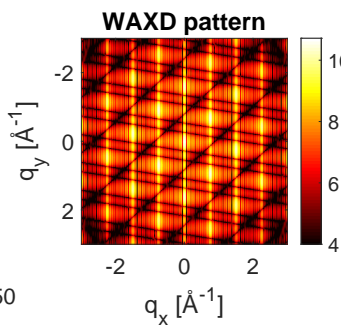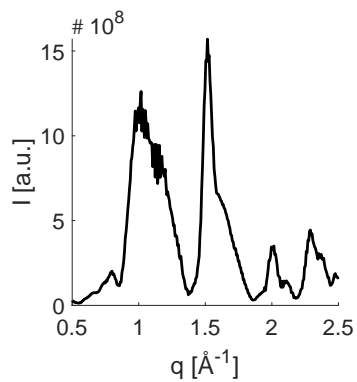

Model: Rh2

Aggregation direction: (200)

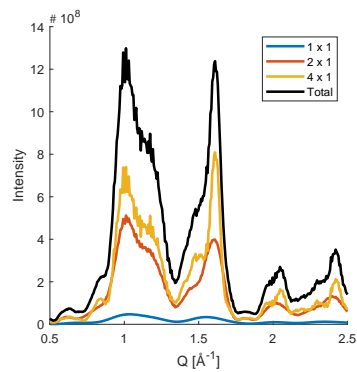

Sample #1

Vol% 1x1: 4.7

Vol% 2x1: 42.3

Vol% 4x1: 53.0

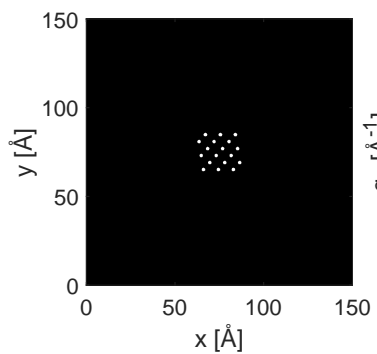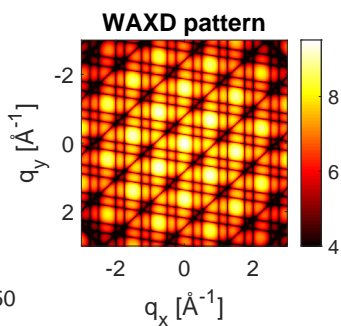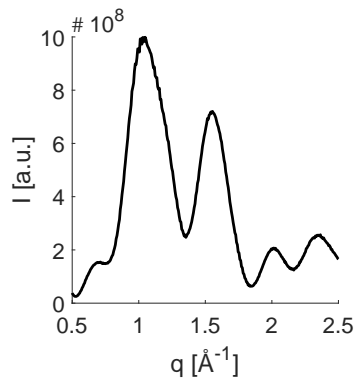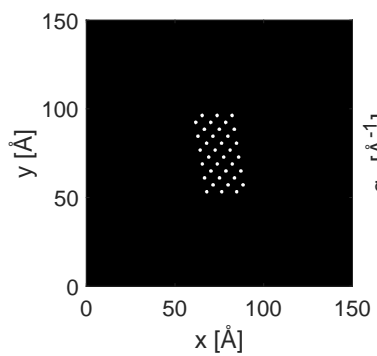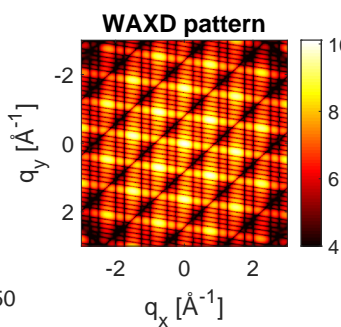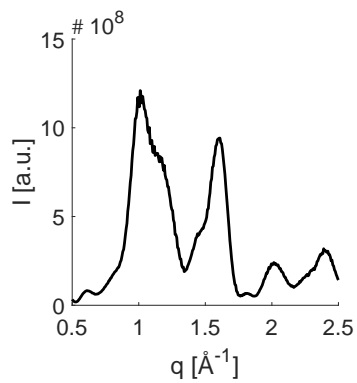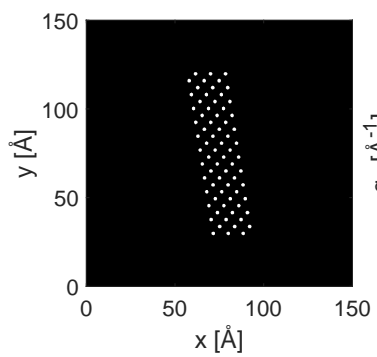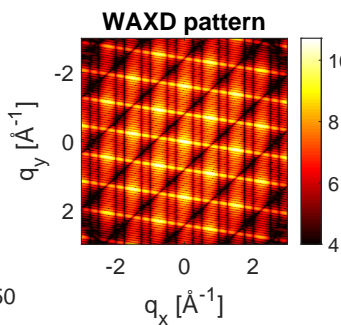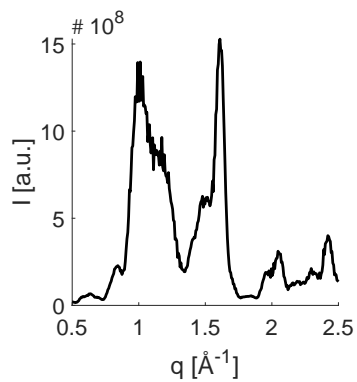

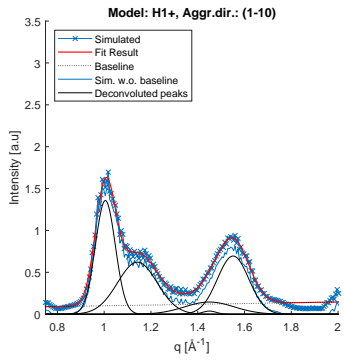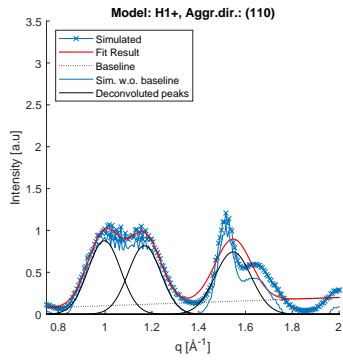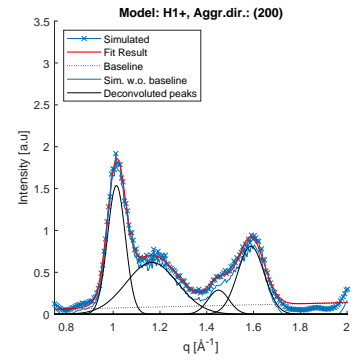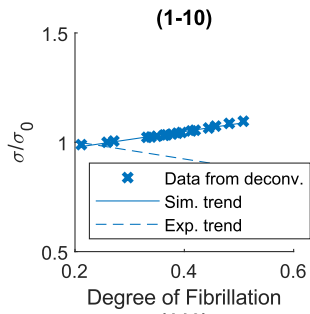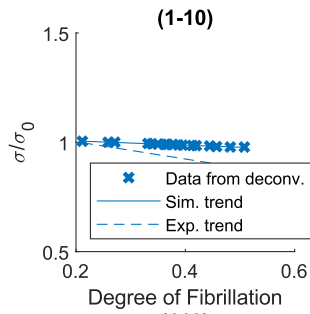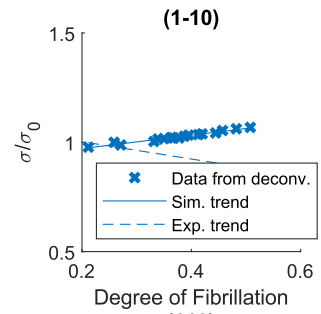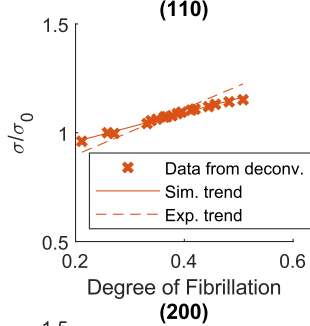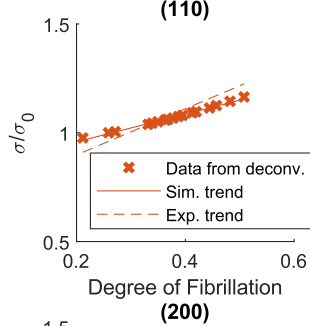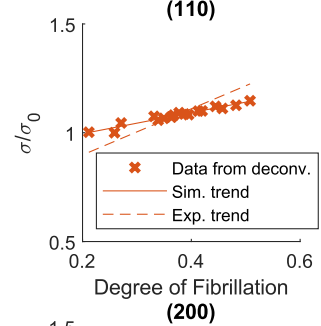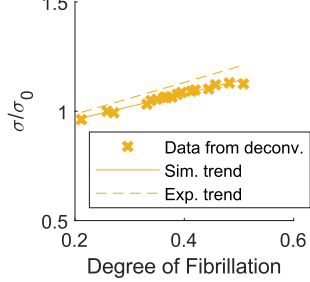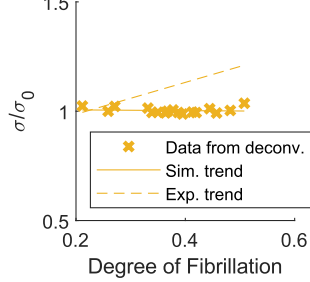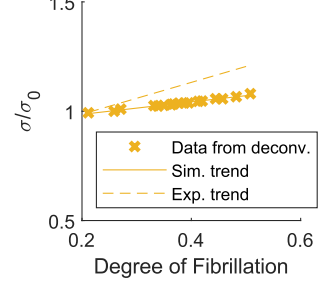

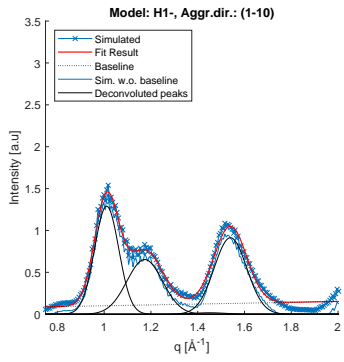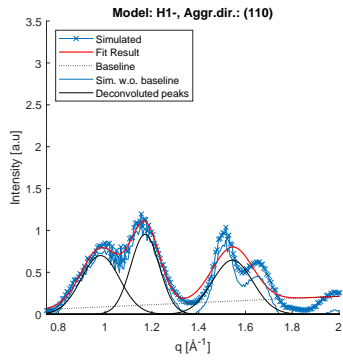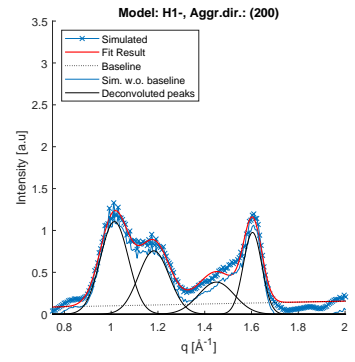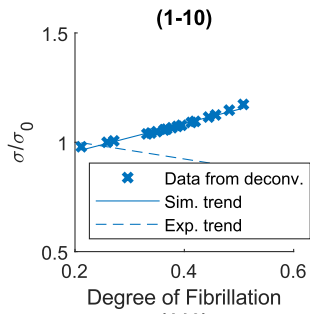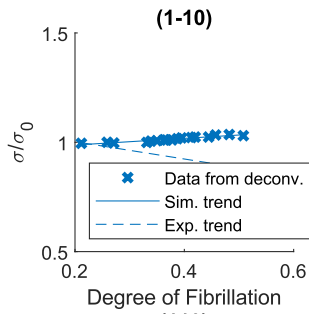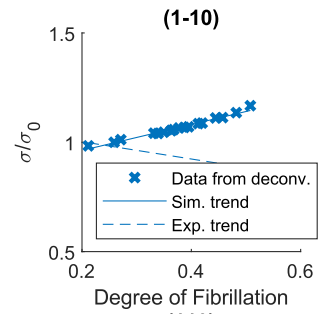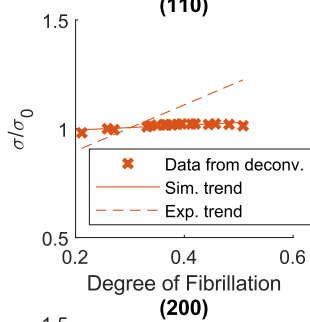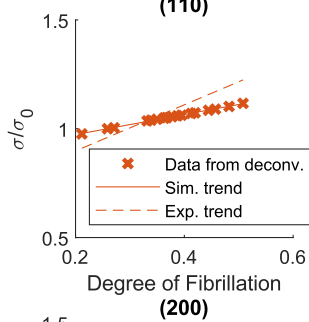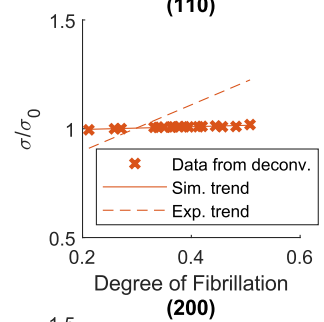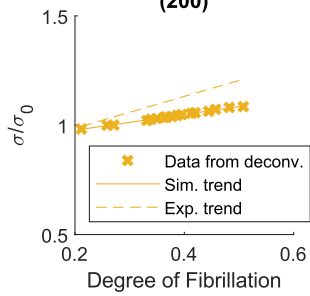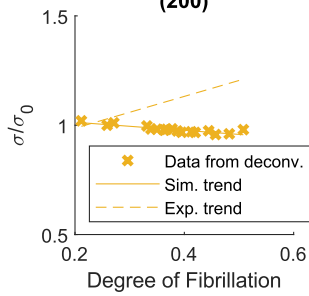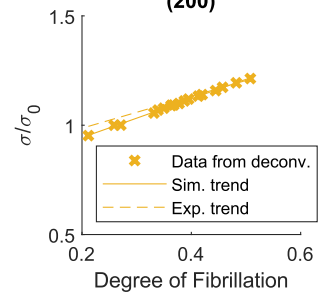



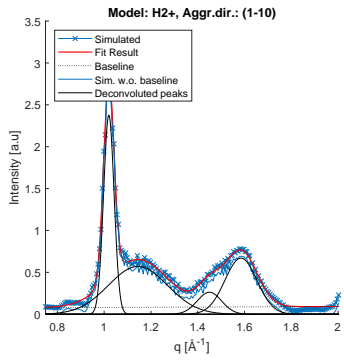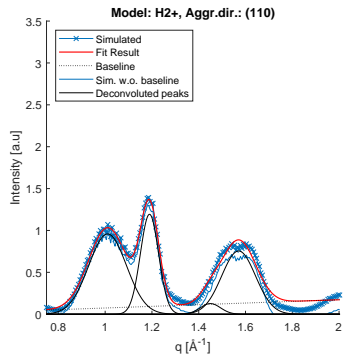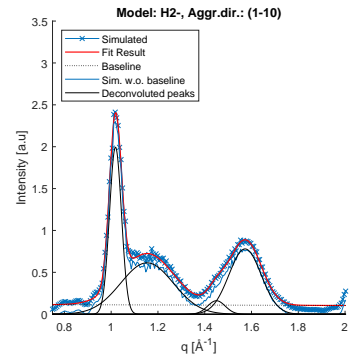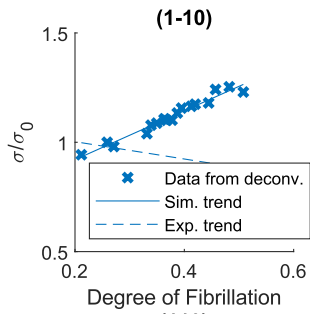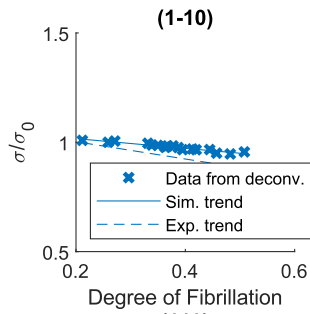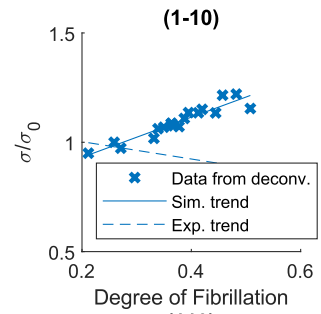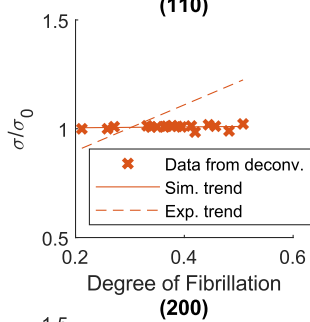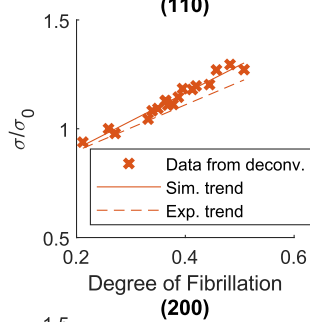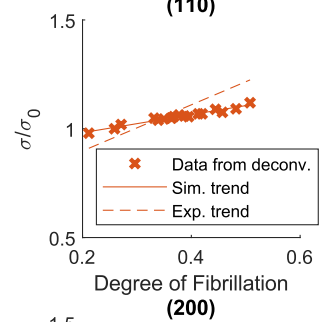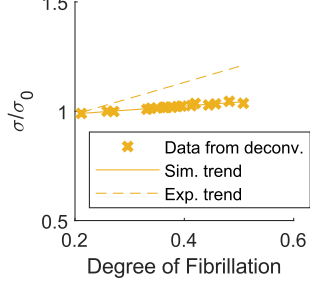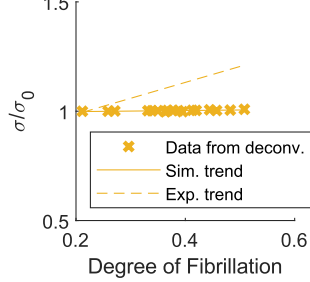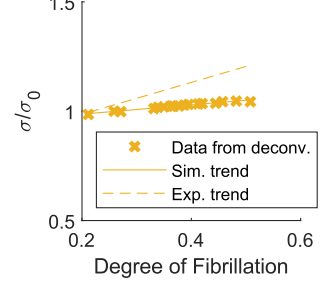

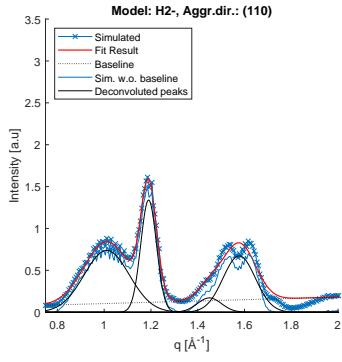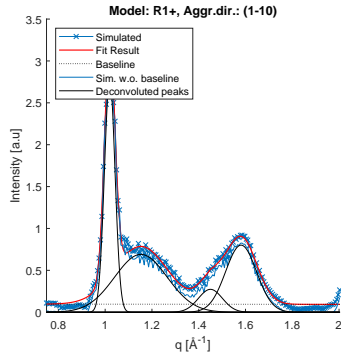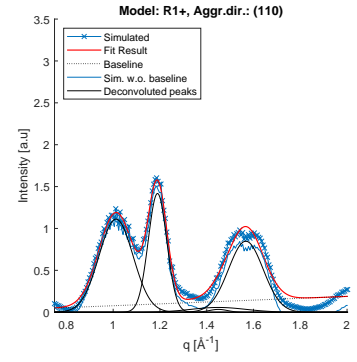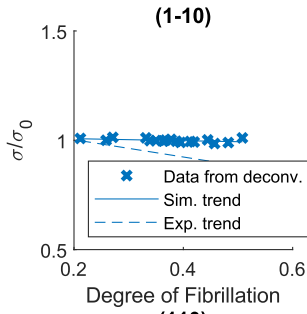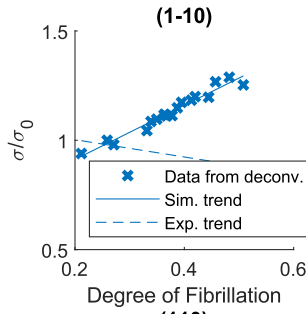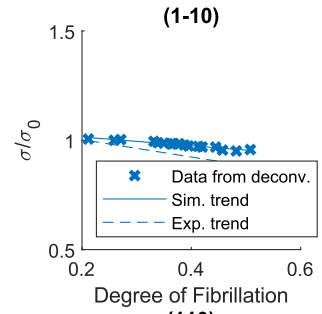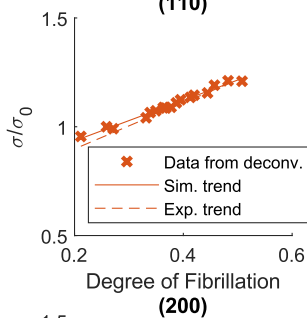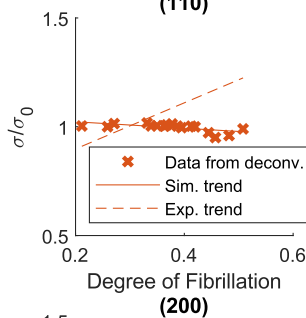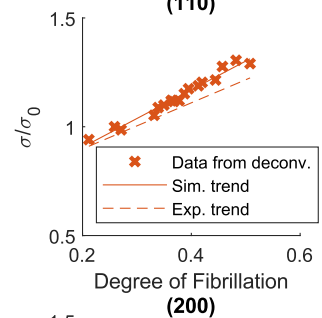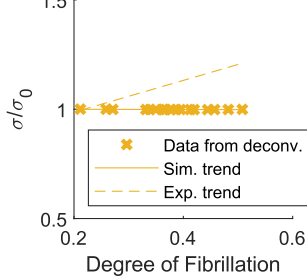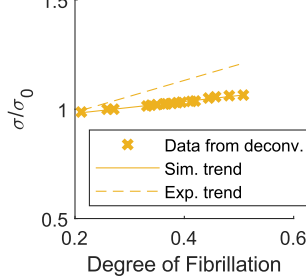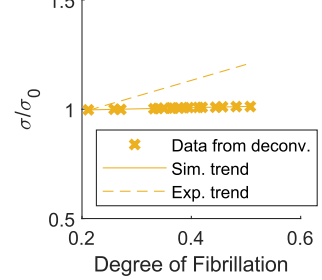

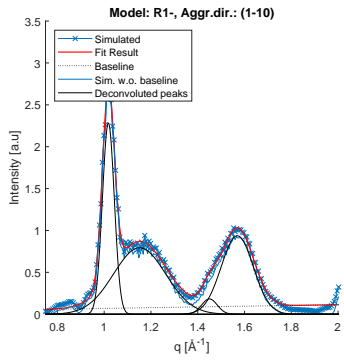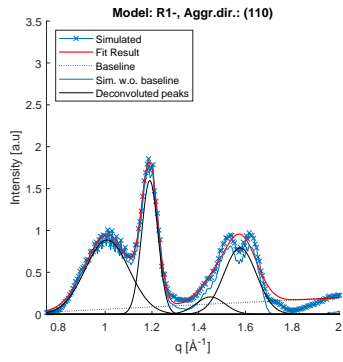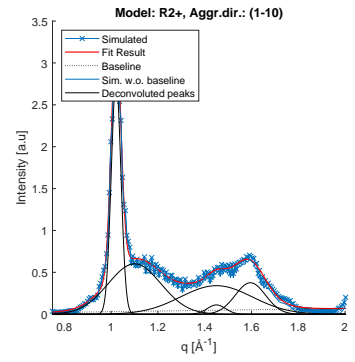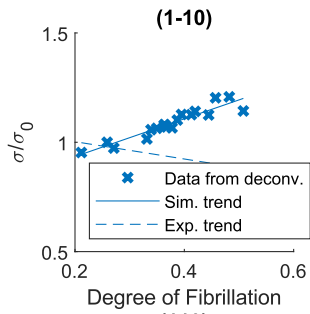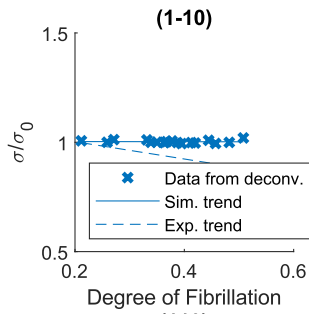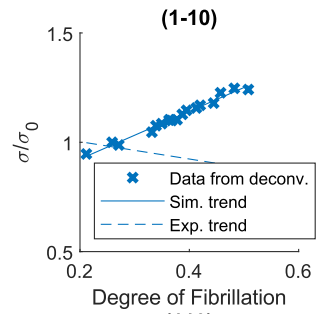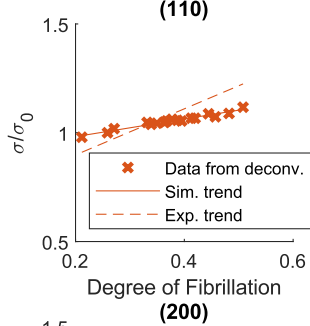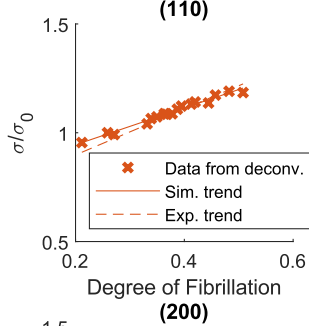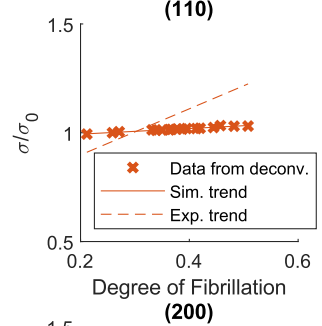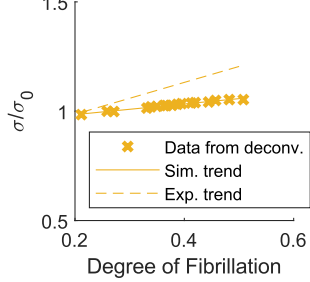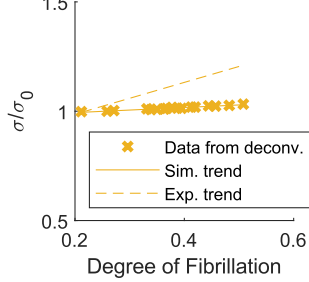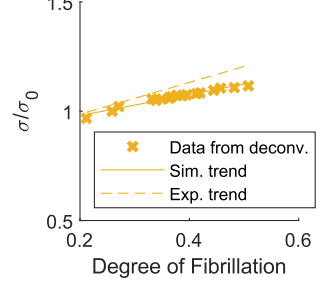

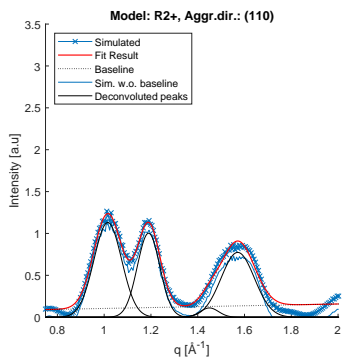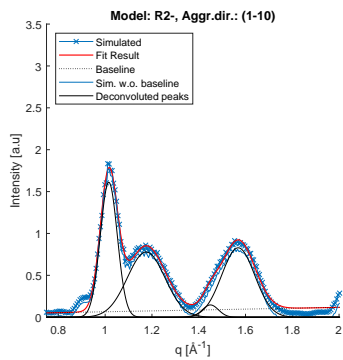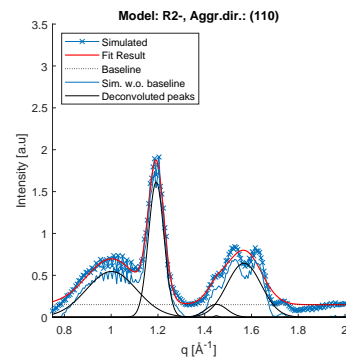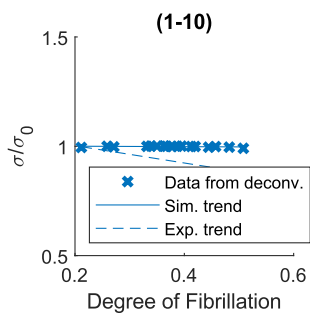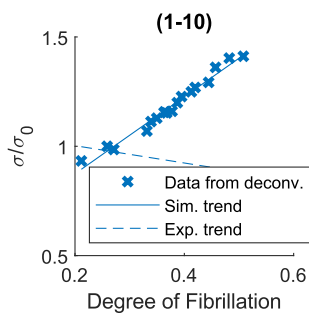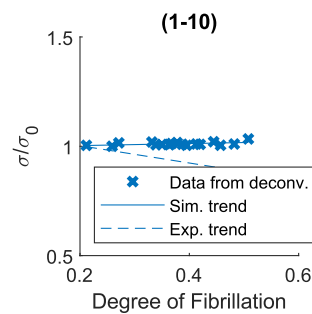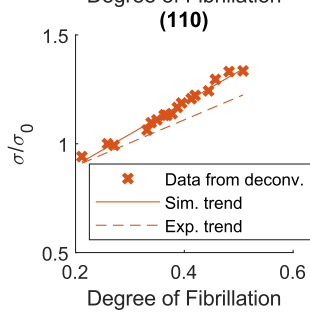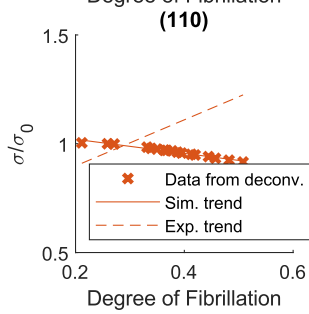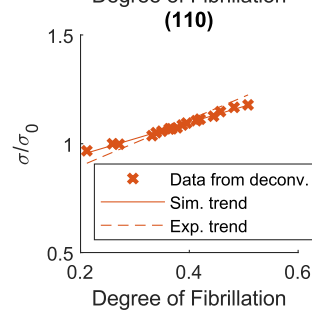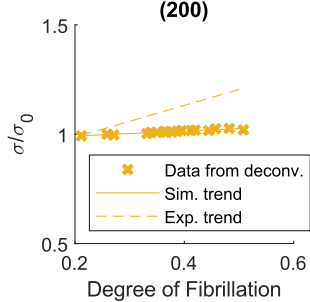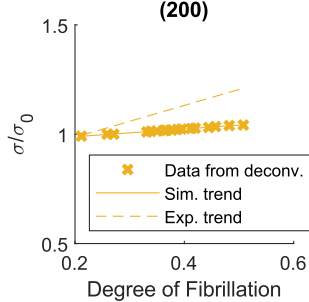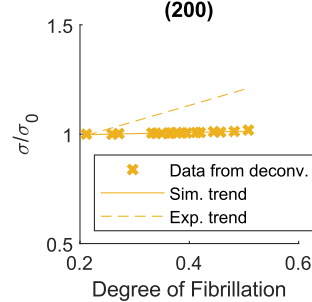

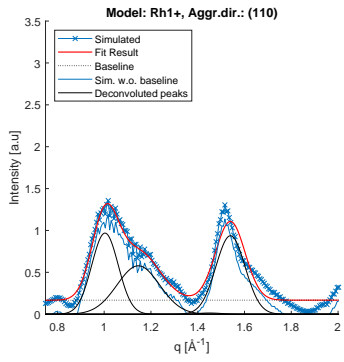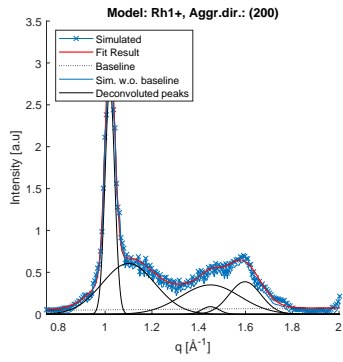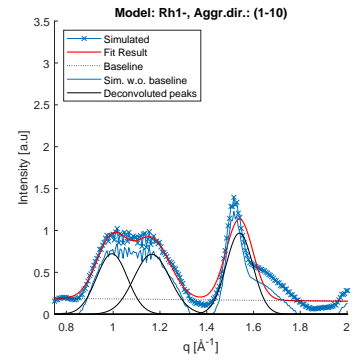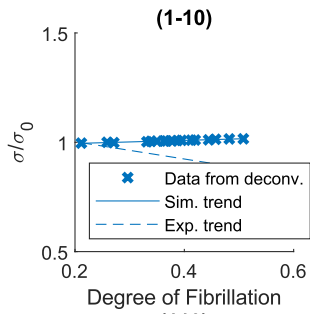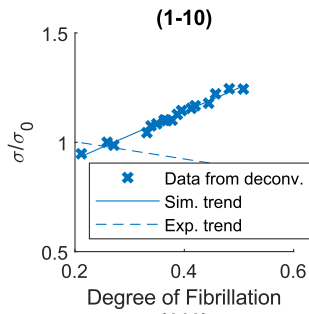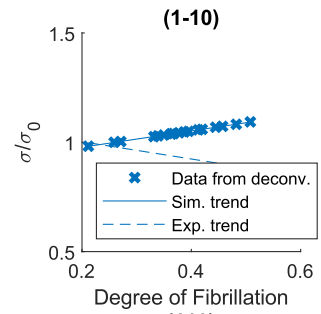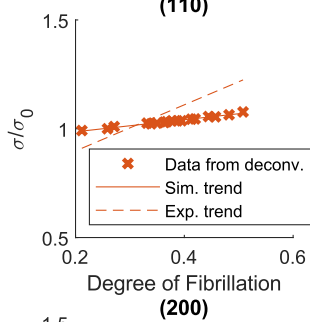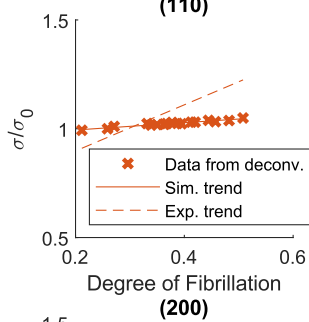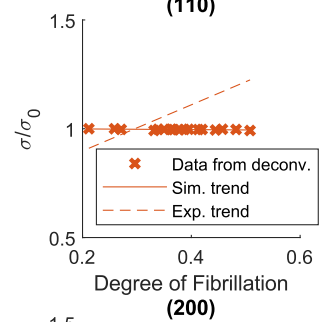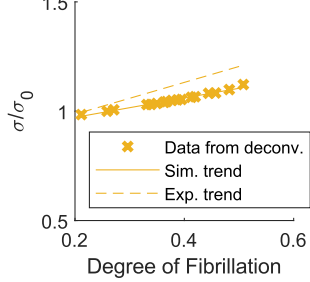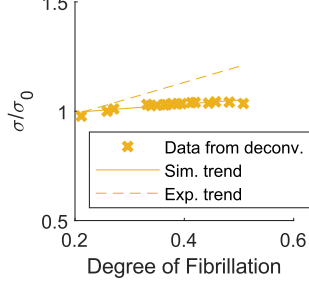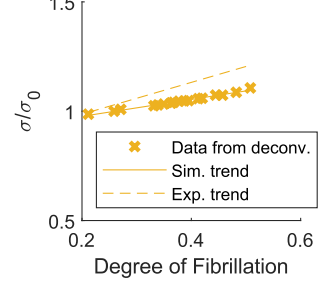

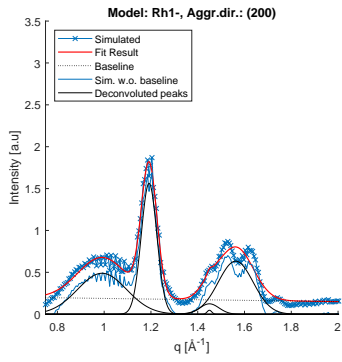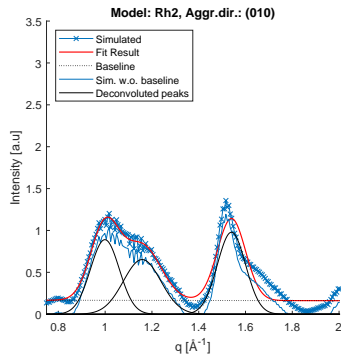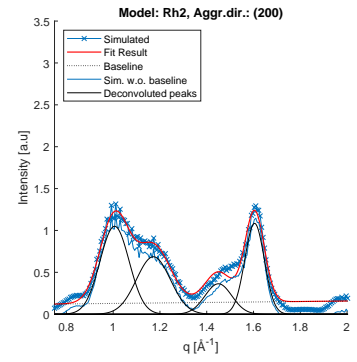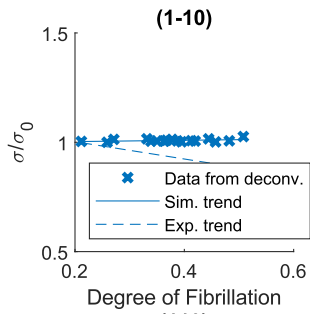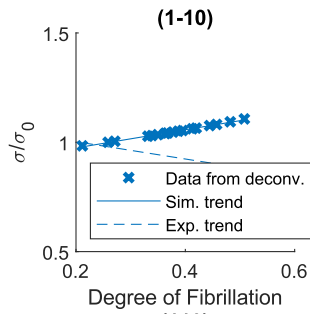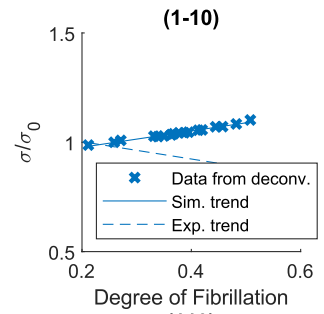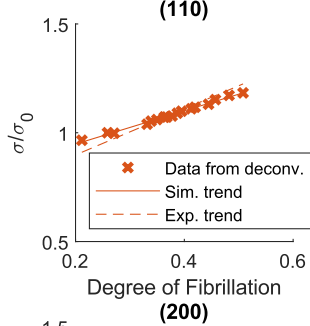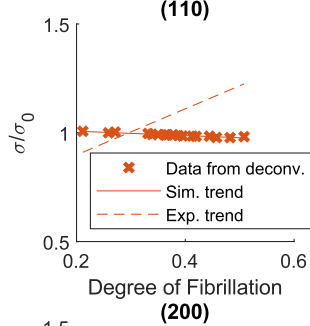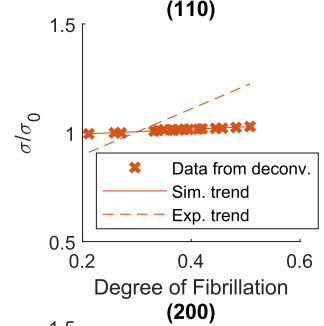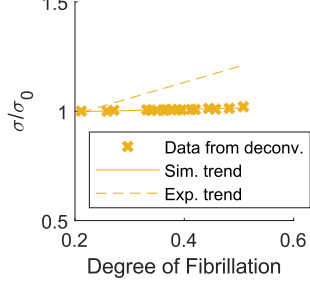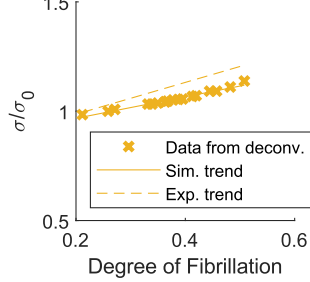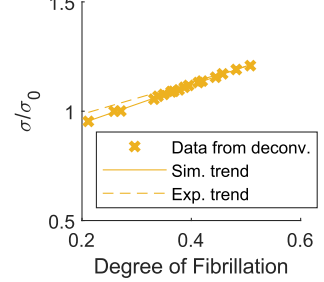

## **WAXD simulations: Results**

**Form factor of a CNF chain with semi-axes**

**2 Å x 0.75 Å**

Model: H1+

Aggregation direction: (1-10)

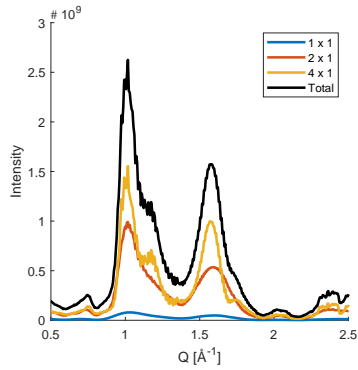

Sample #1

Vol% 1x1: 4.7

Vol% 2x1: 42.3

Vol% 4x1: 53.0

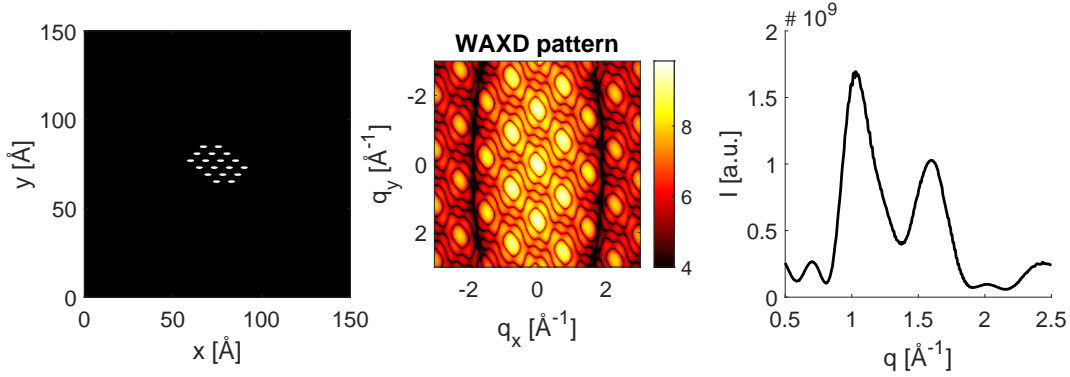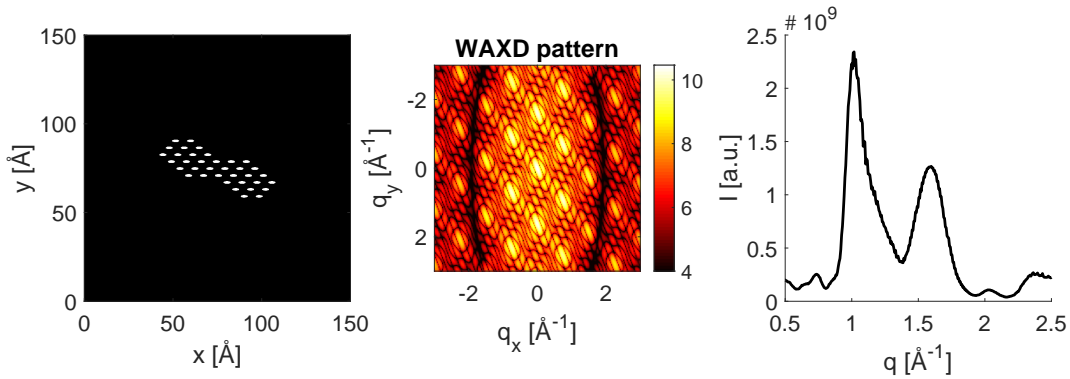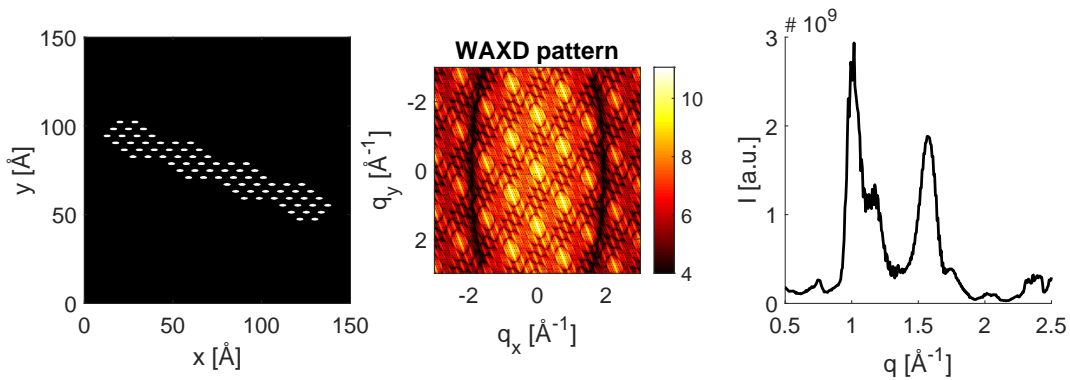



Model: H1+

Aggregation direction: (110)

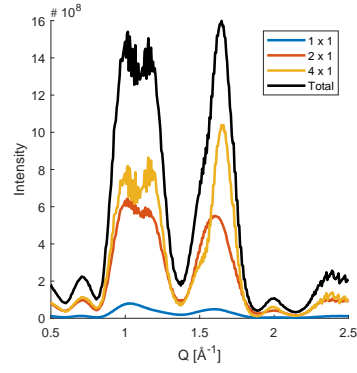

Sample #1

Vol% 1x1: 4.7

Vol% 2x1: 42.3

Vol% 4x1: 53.0

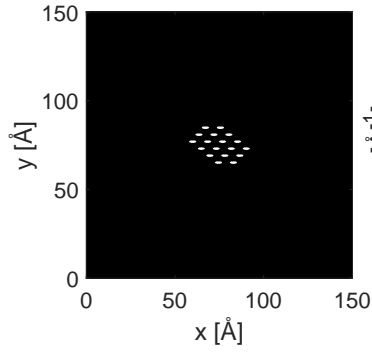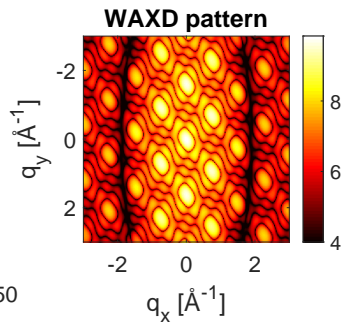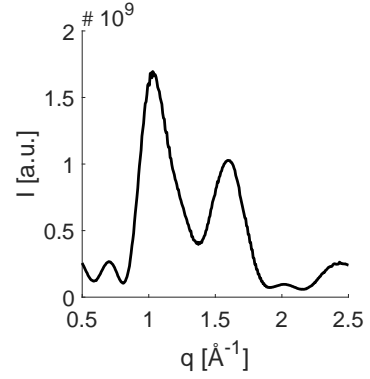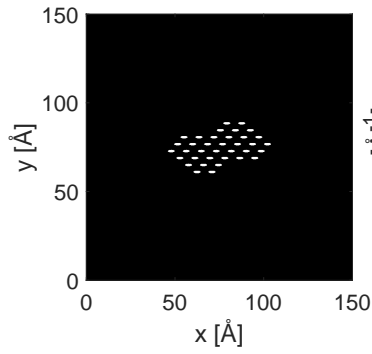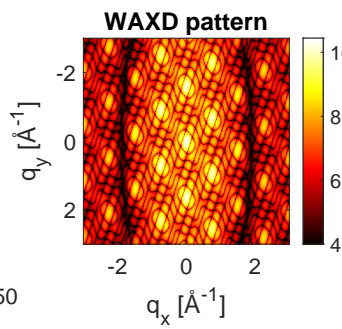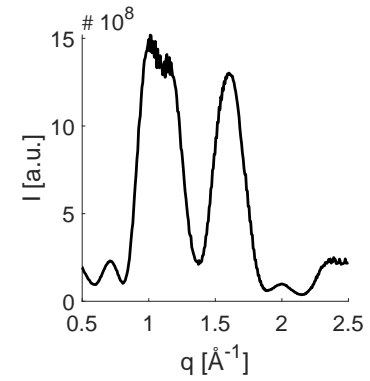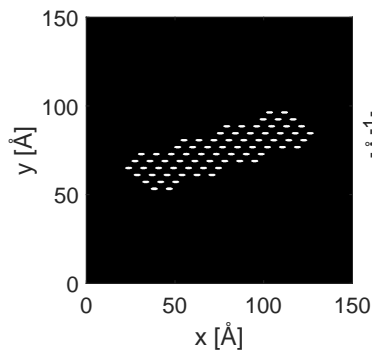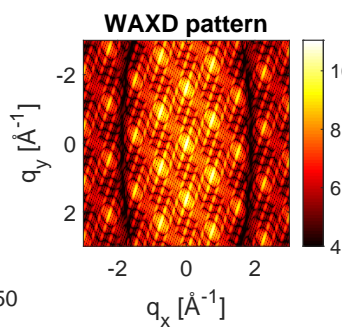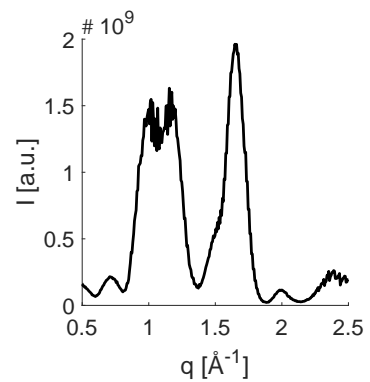

Model: H1+

Aggregation direction: (200)

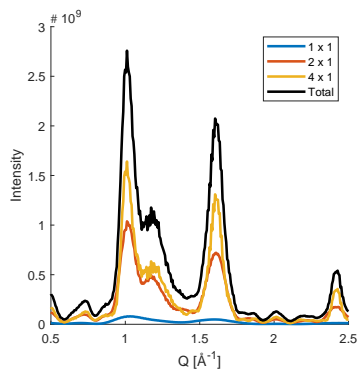

Sample #1

Vol% 1x1: 4.7

Vol% 2x1: 42.3

Vol% 4x1: 53.0

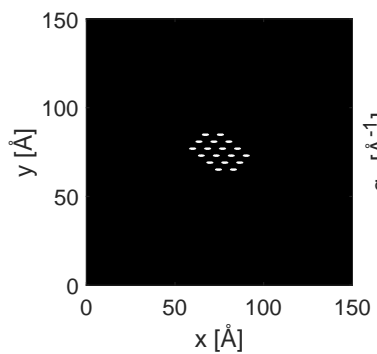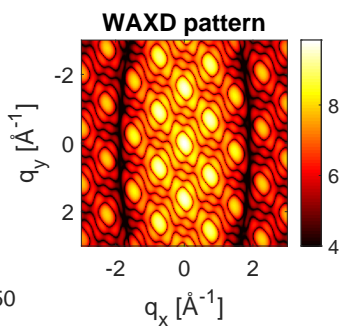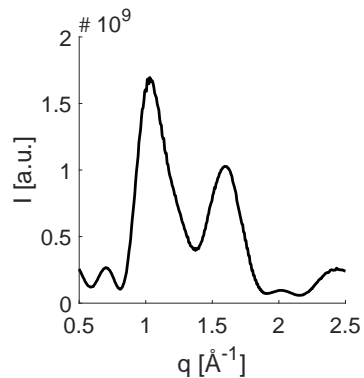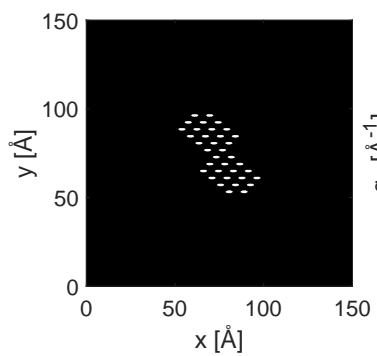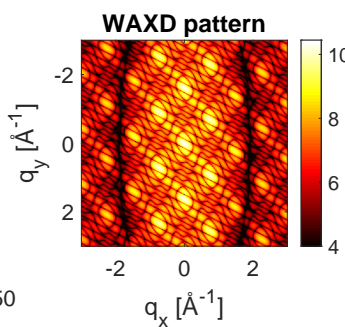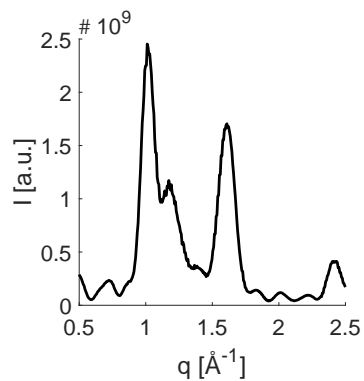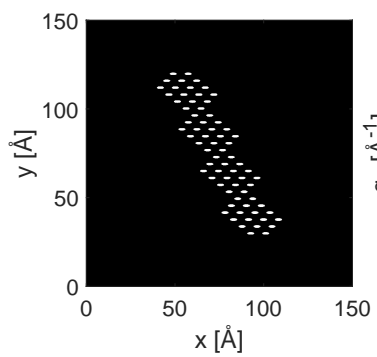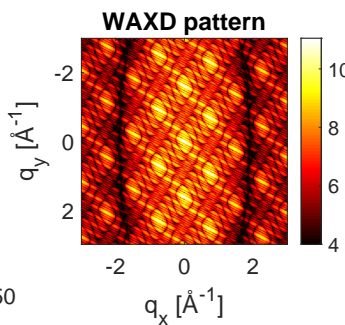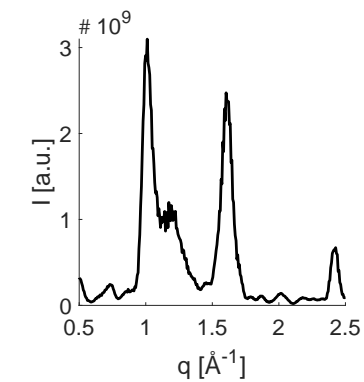

Model: H1-

Aggregation direction: (1-10)

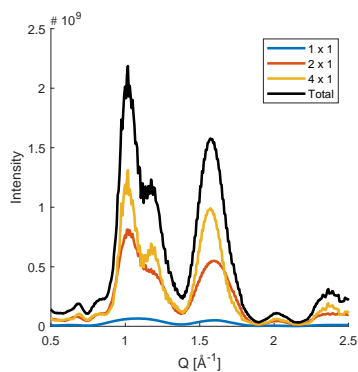

Sample #1

Vol% 1x1: 4.7

Vol% 2x1: 42.3

Vol% 4x1: 53.0

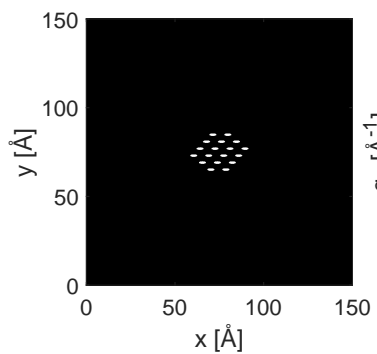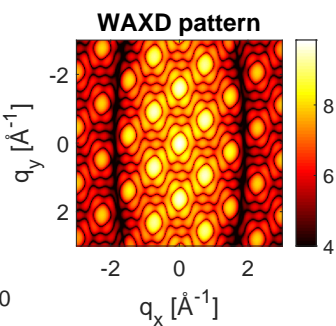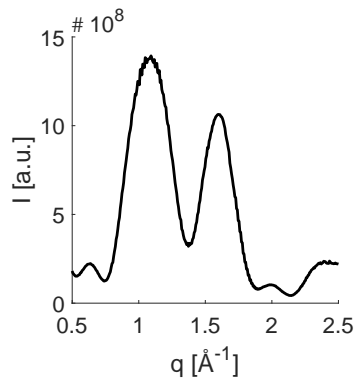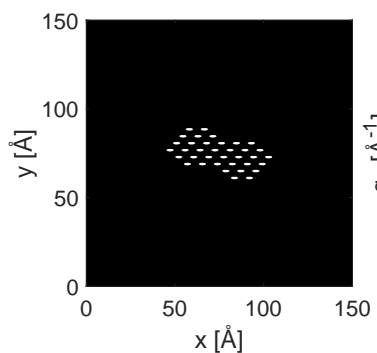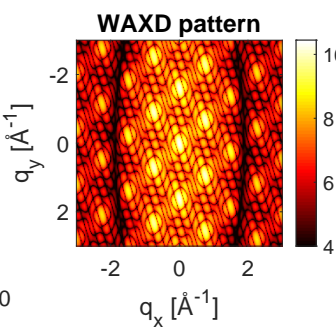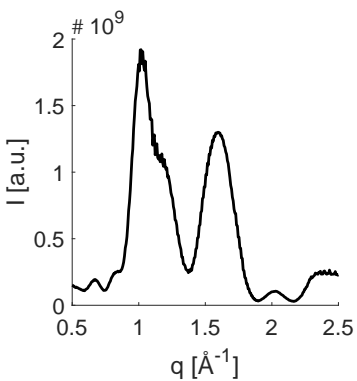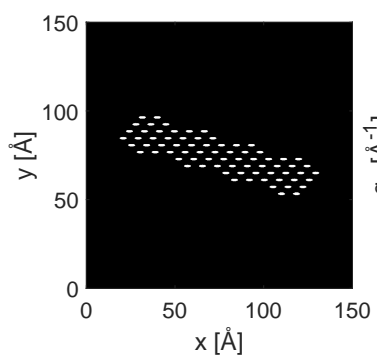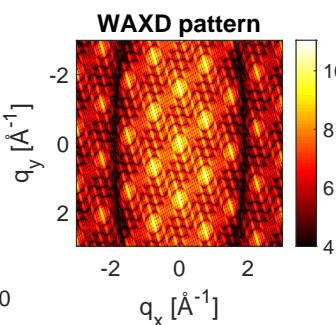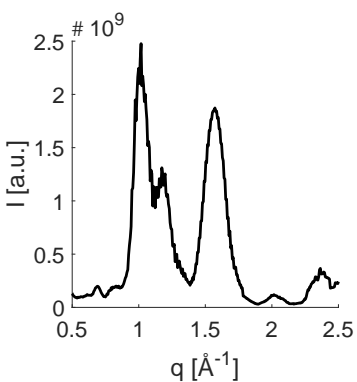

Model: H1-

Aggregation direction: (110)

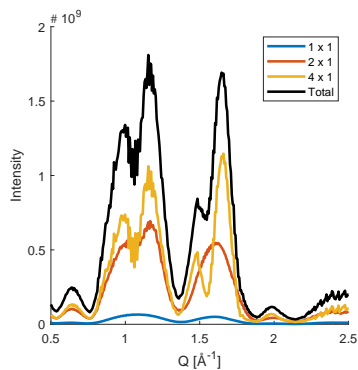

Sample #1

Vol% 1x1: 4.7

Vol% 2x1: 42.3

Vol% 4x1: 53.0

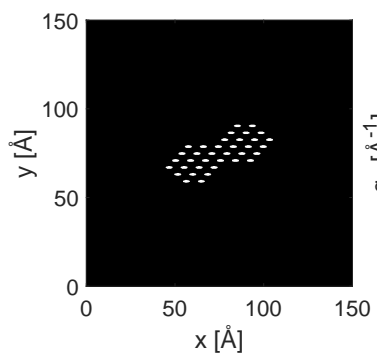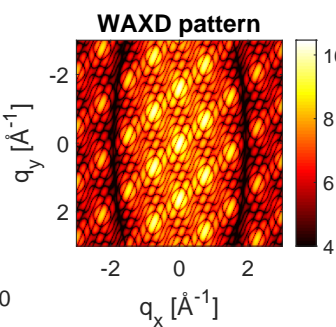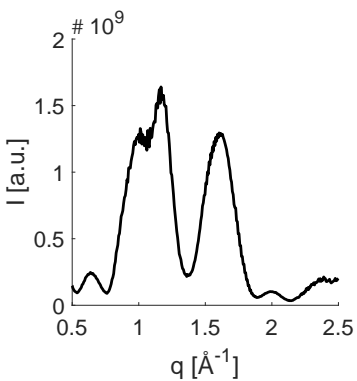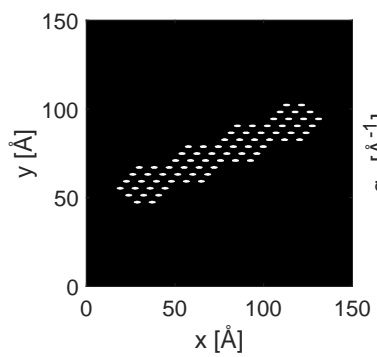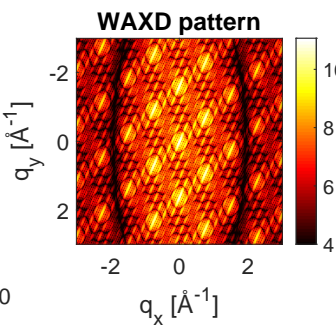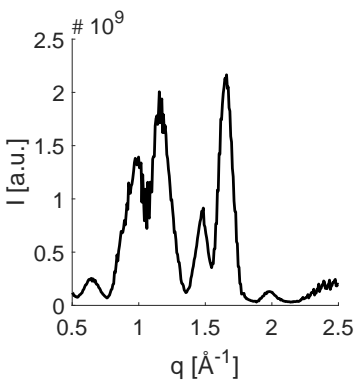

Model: H1-

Aggregation direction: (200)

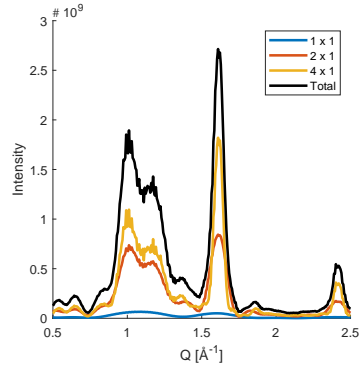

Sample #1

Vol% 1x1: 4.7

Vol% 2x1: 42.3

Vol% 4x1: 53.0

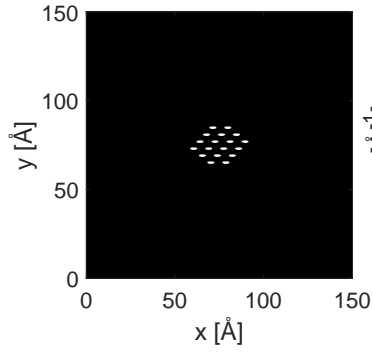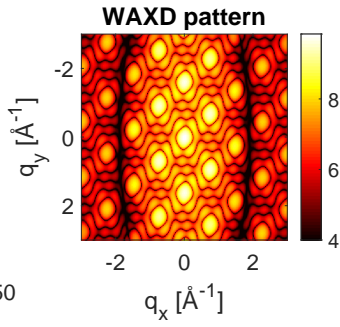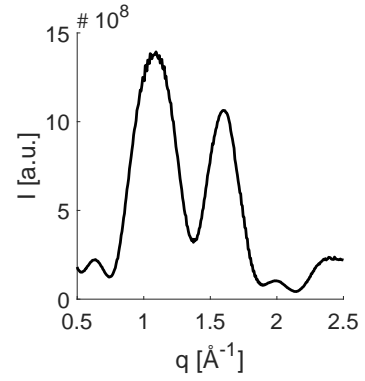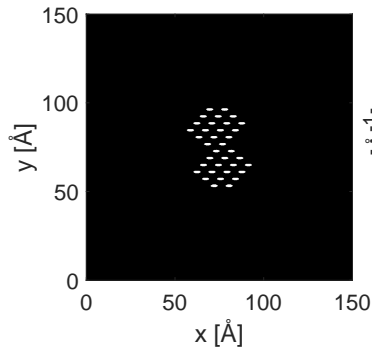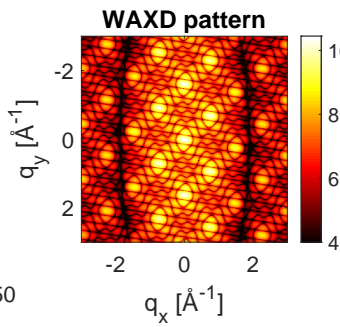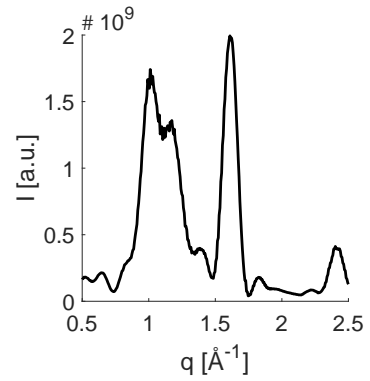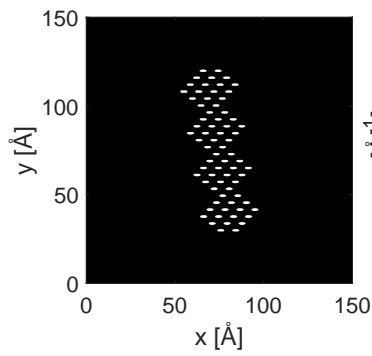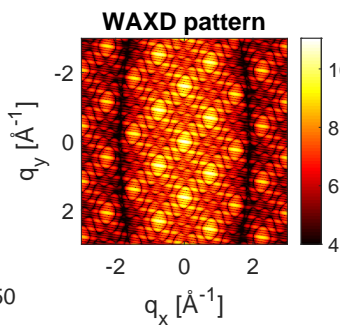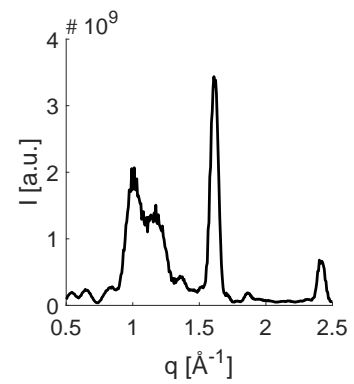

Model: H2+

Aggregation direction: (1-10)

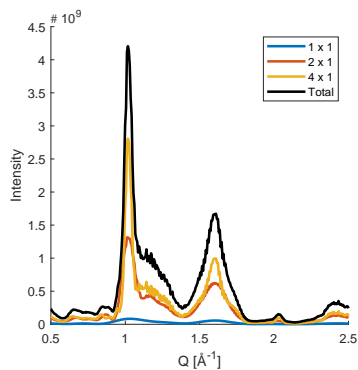

Sample #1

Vol% 1x1: 4.7

Vol% 2x1: 42.3

Vol% 4x1: 53.0

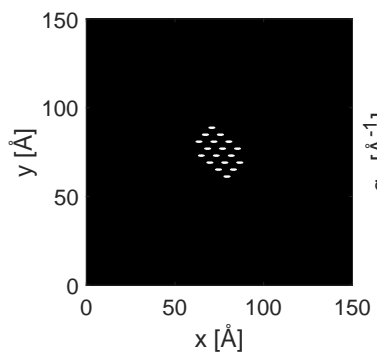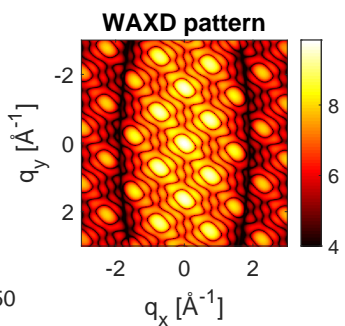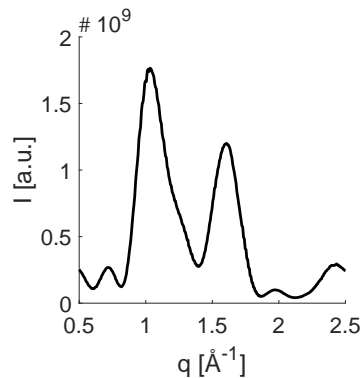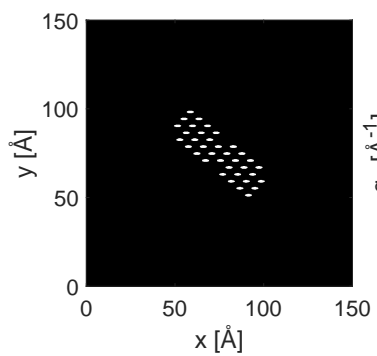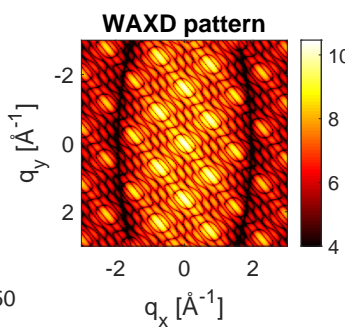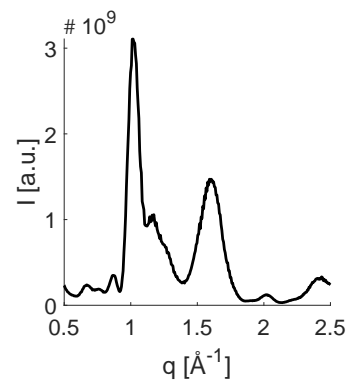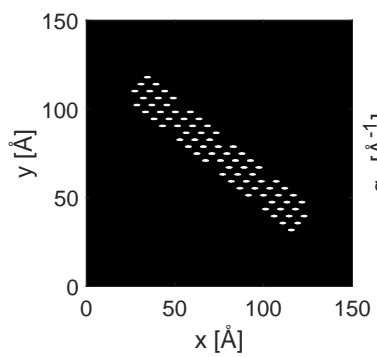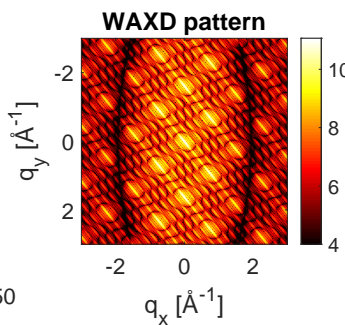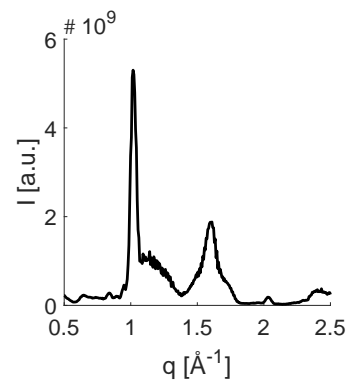

Model: H2+

Aggregation direction: (110)

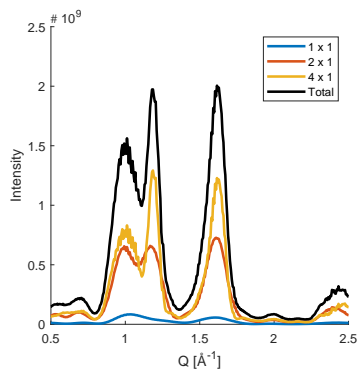

Sample #1

Vol% 1x1: 4.7

Vol% 2x1: 42.3

Vol% 4x1: 53.0

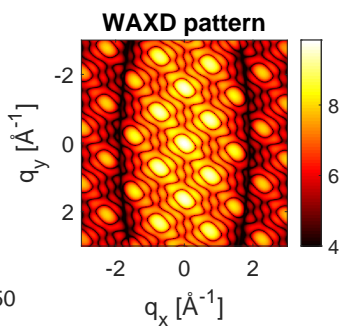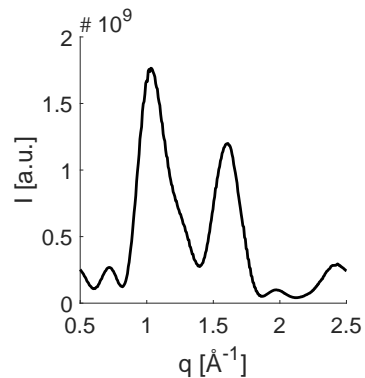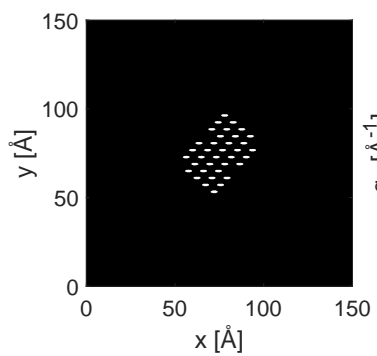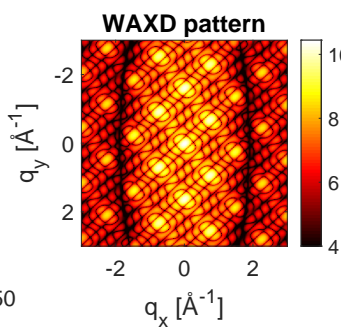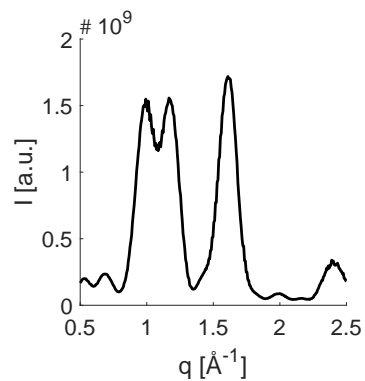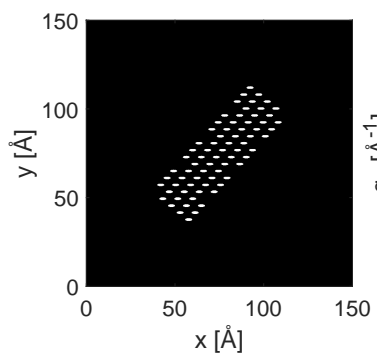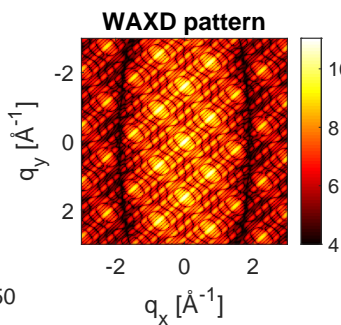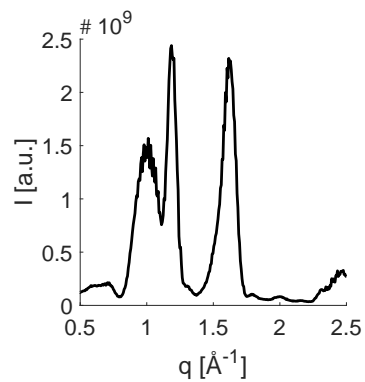

Model: H2-

Aggregation direction: (1-10)

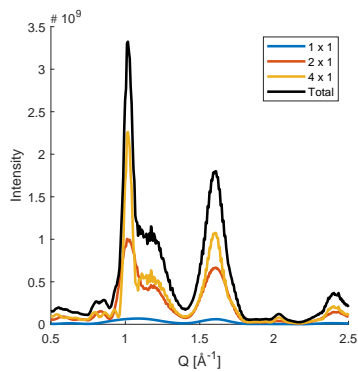

Sample #1

Vol% 1x1: 4.7

Vol% 2x1: 42.3

Vol% 4x1: 53.0

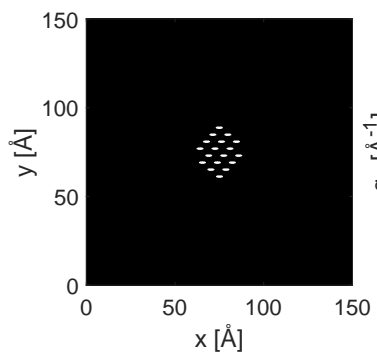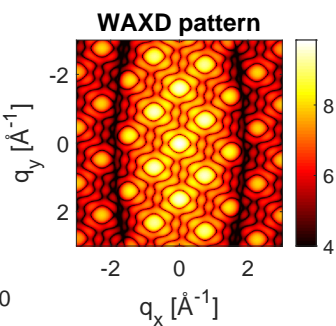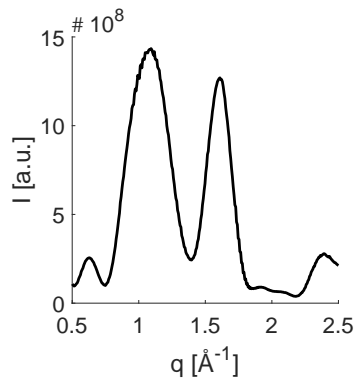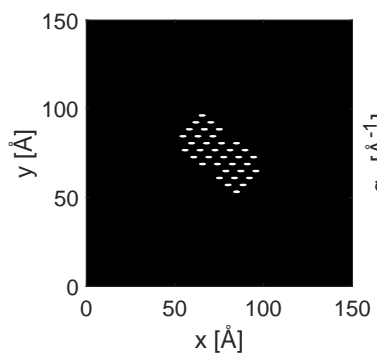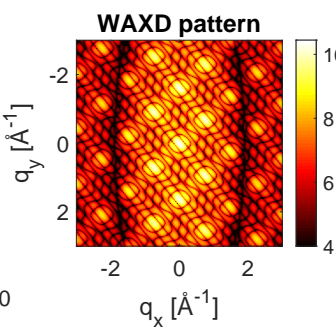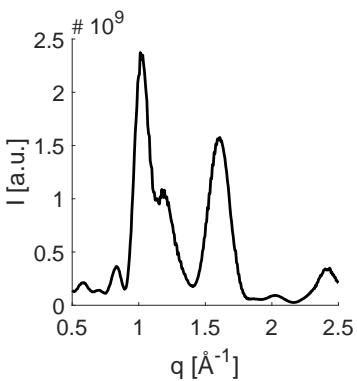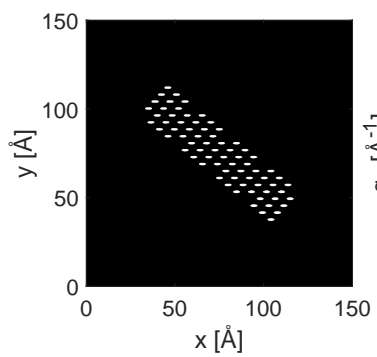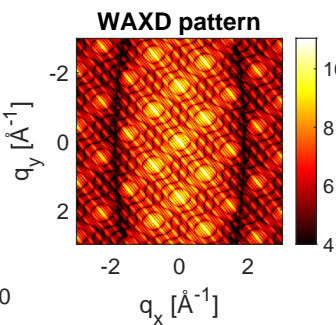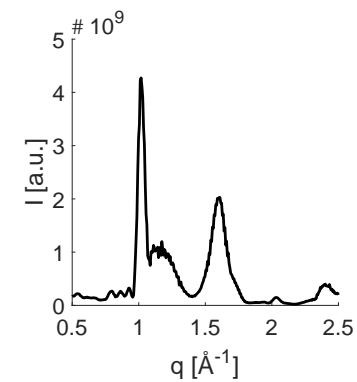



Model: H2-

Aggregation direction: (110)

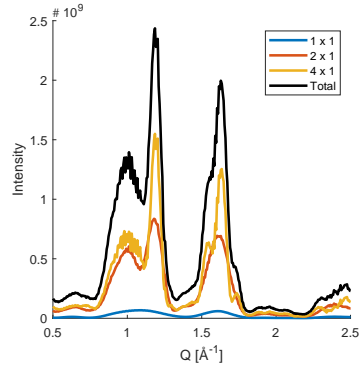

Sample #1

Vol% 1x1: 4.7

Vol% 2x1: 42.3

Vol% 4x1: 53.0

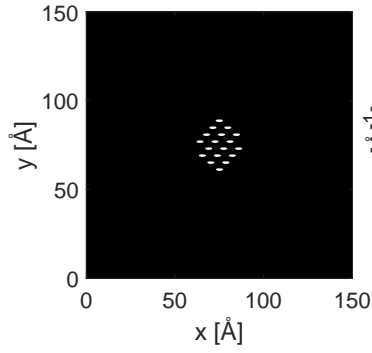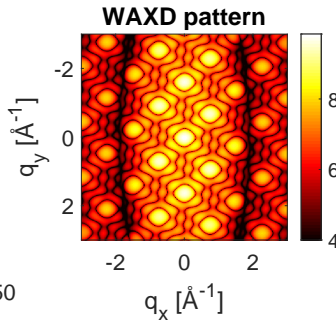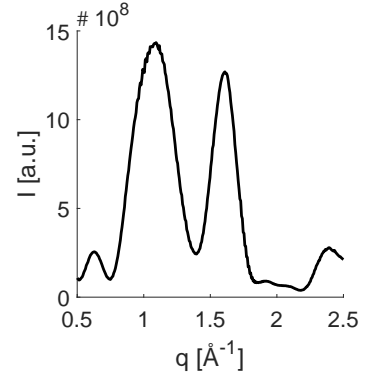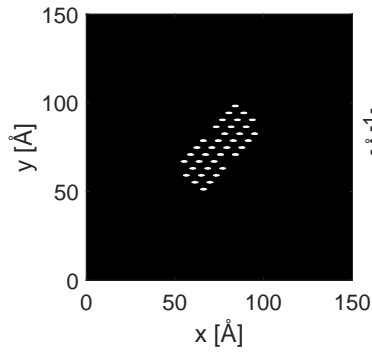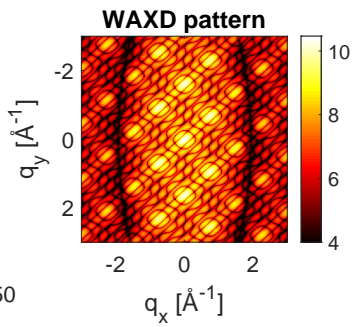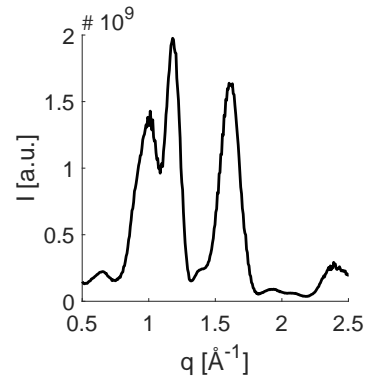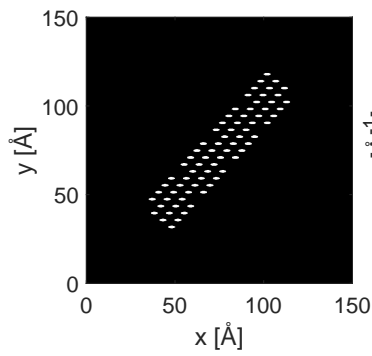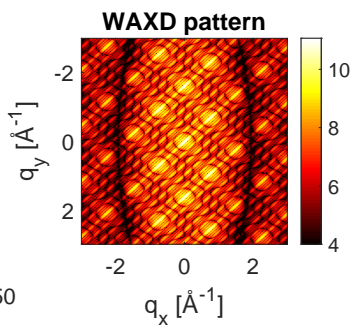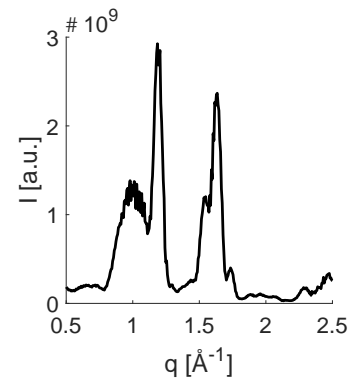

Model: R1+

Aggregation direction: (1-10)

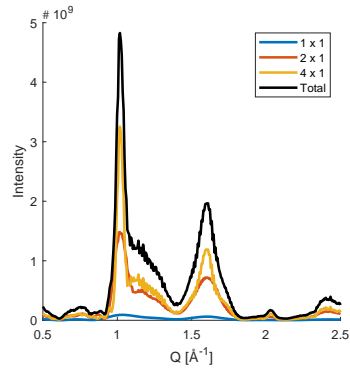

Sample #1

Vol% 1x1: 4.7

Vol% 2x1: 42.3

Vol% 4x1: 53.0

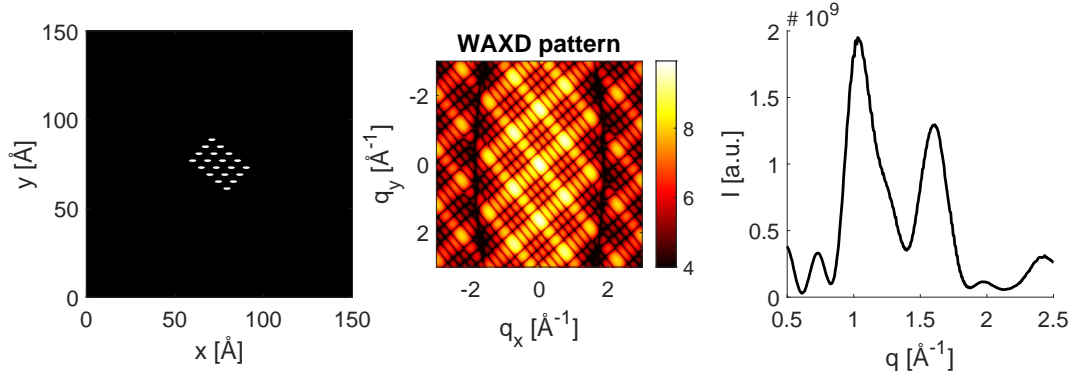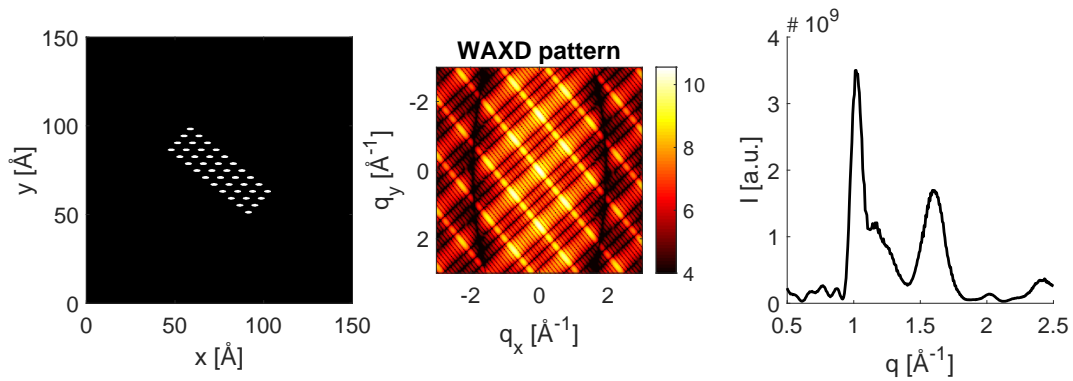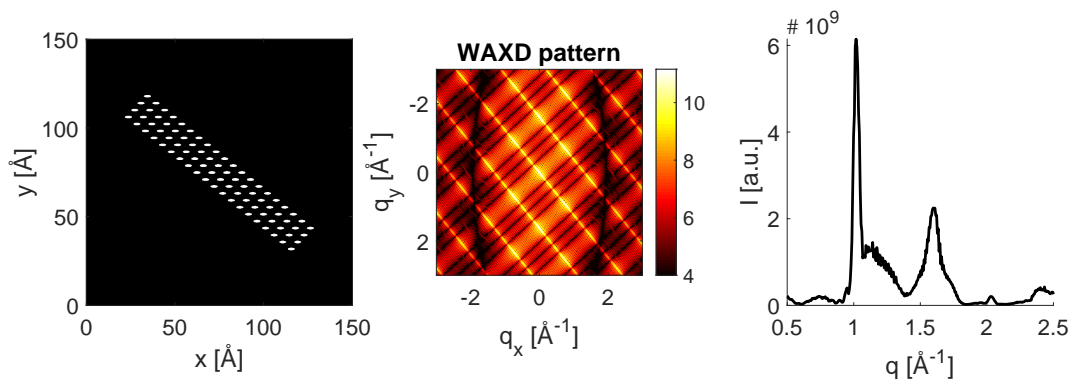

Model: R1+

Aggregation direction: (110)

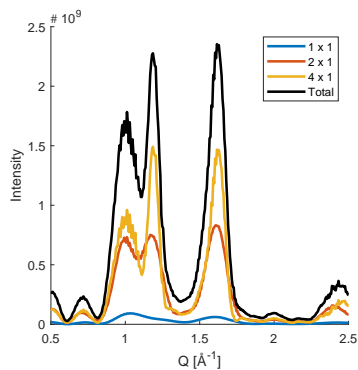

Sample #1

Vol% 1x1: 4.7

Vol% 2x1: 42.3

Vol% 4x1: 53.0

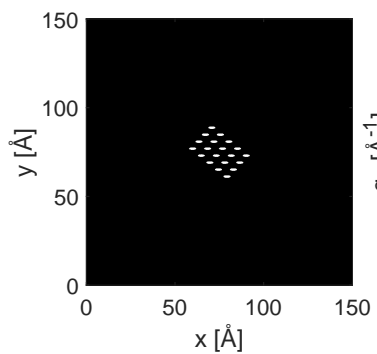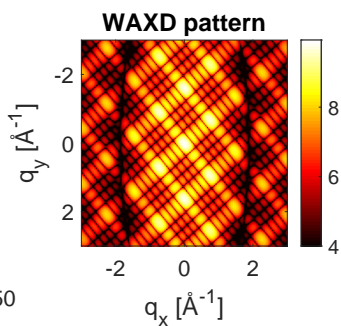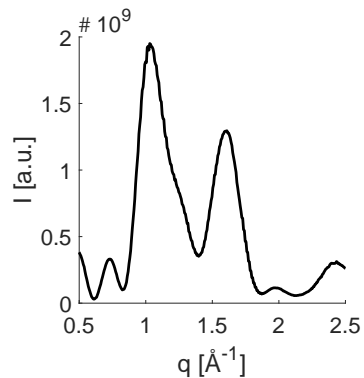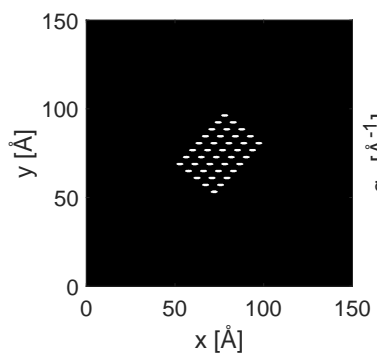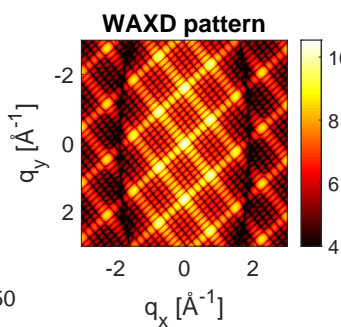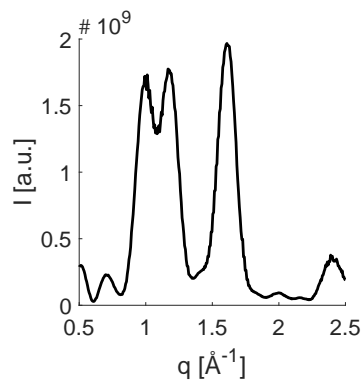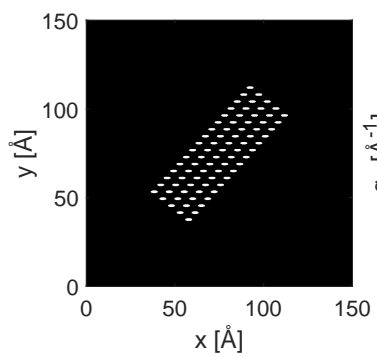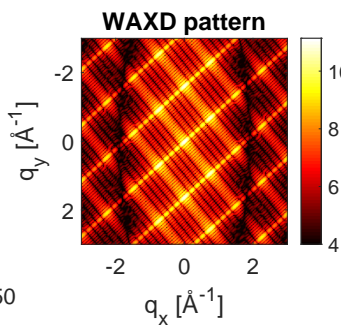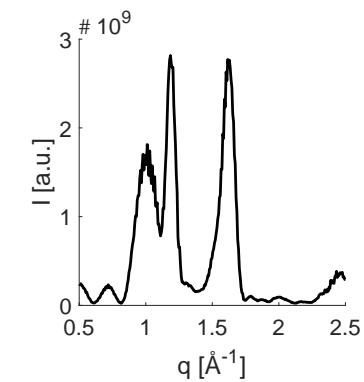

Model: R1-

Aggregation direction: (1-10)

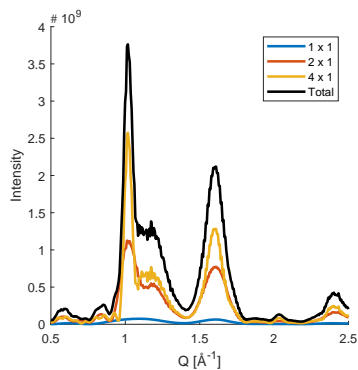

Sample #1

Vol% 1x1: 4.7

Vol% 2x1: 42.3

Vol% 4x1: 53.0

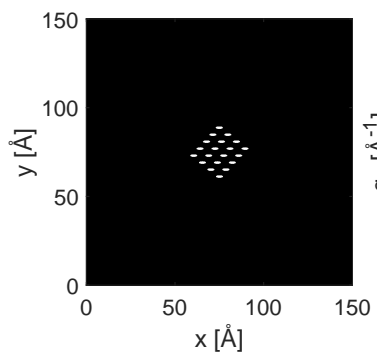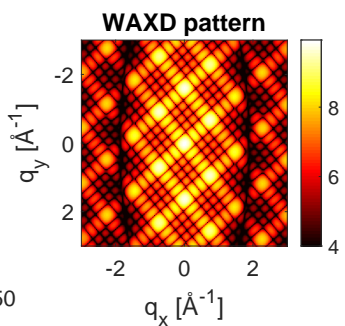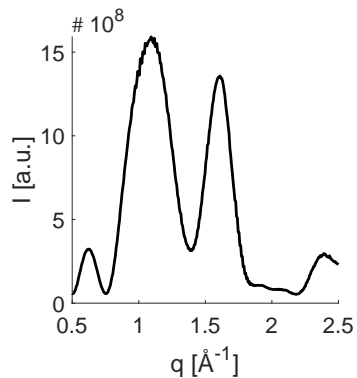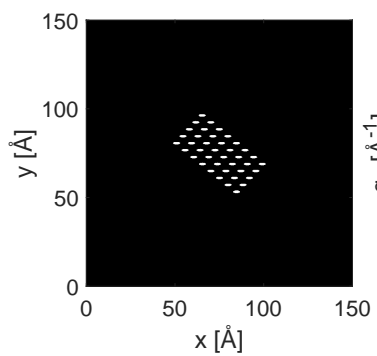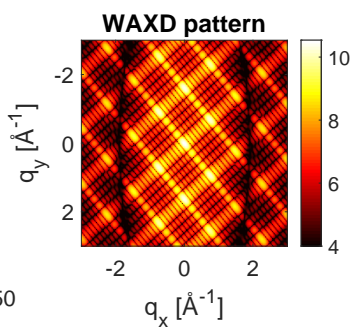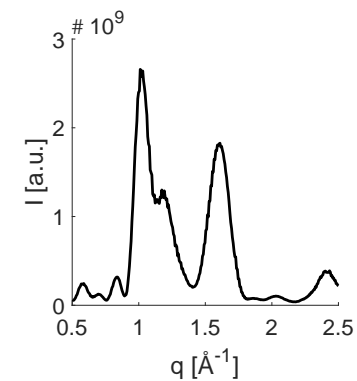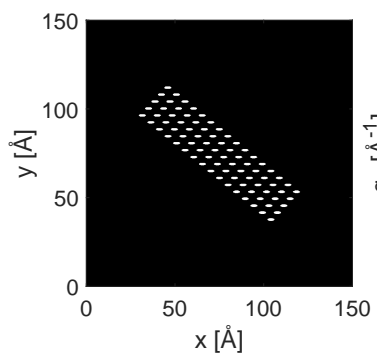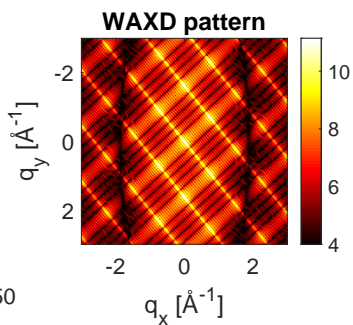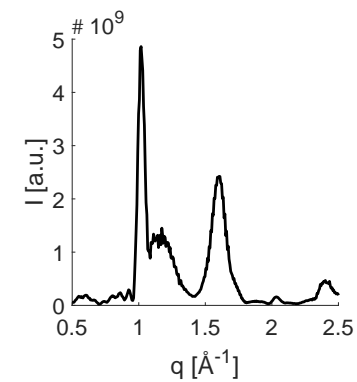

Model: R1-

Aggregation direction: (110)

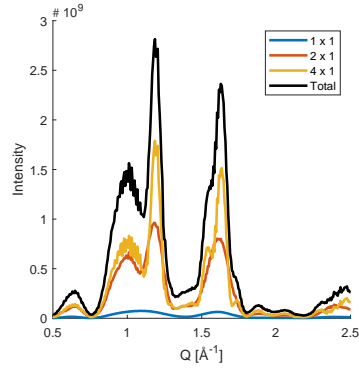

Sample #1

Vol% 1x1: 4.7

Vol% 2x1: 42.3

Vol% 4x1: 53.0

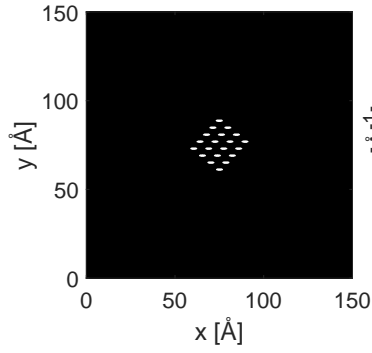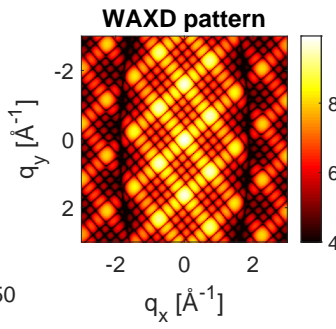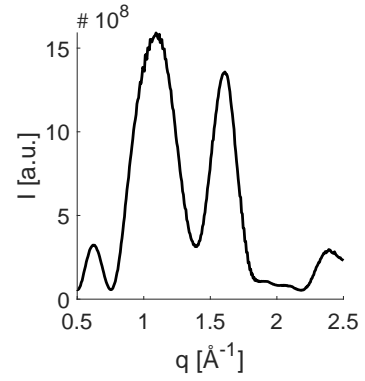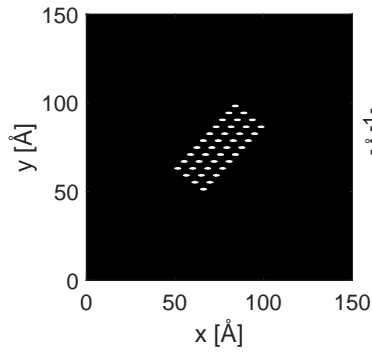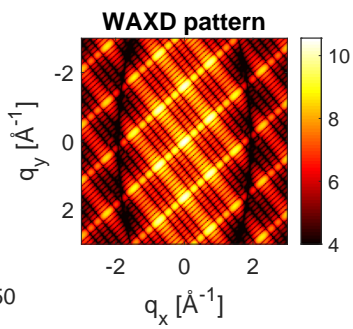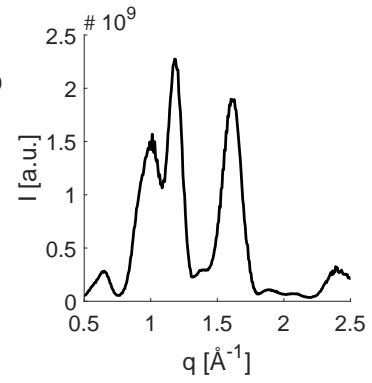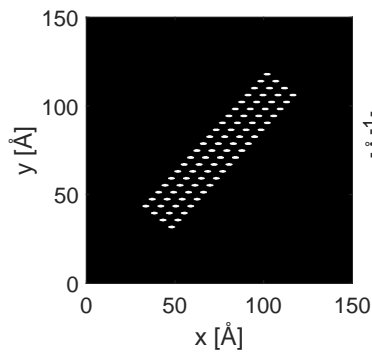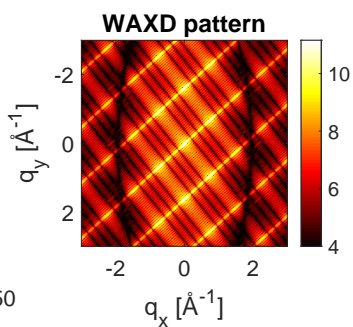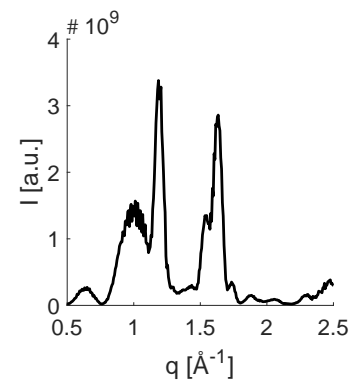

Model: R2+  
 Aggregation direction: (1-10)

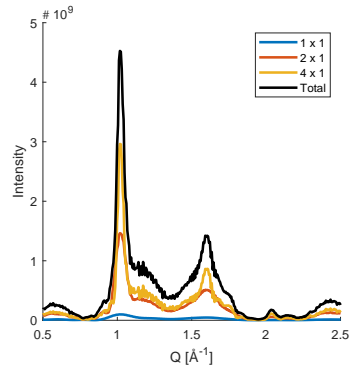

Sample #1  
 Vol% 1x1: 4.7  
 Vol% 2x1: 42.3  
 Vol% 4x1: 53.0

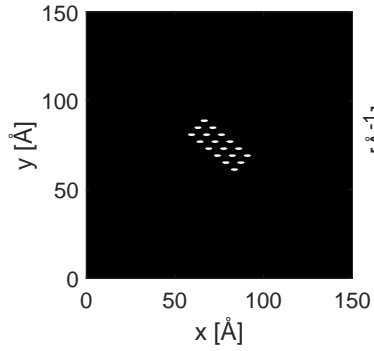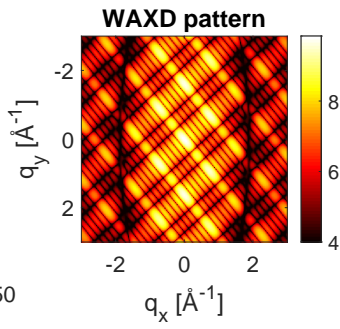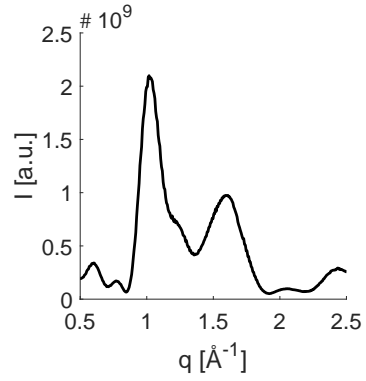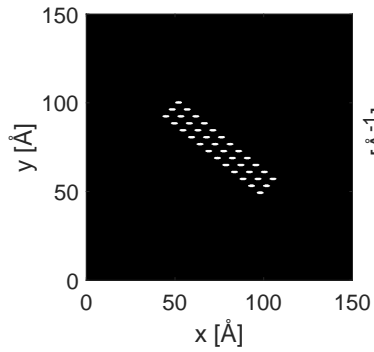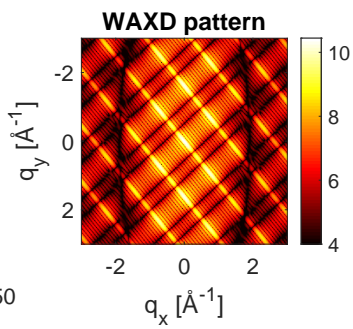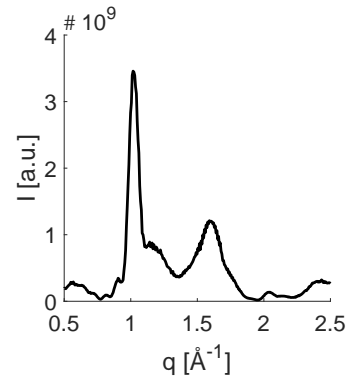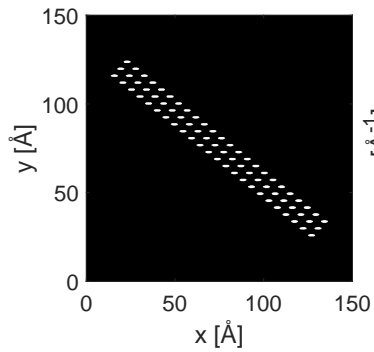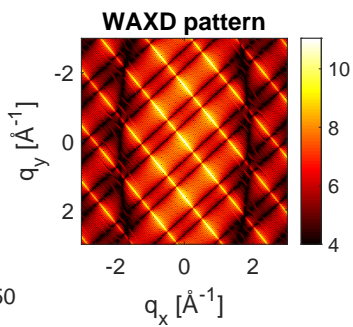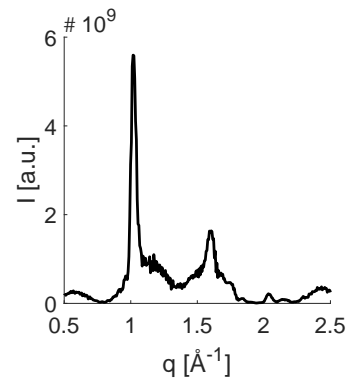

Model: R2+

Aggregation direction: (110)

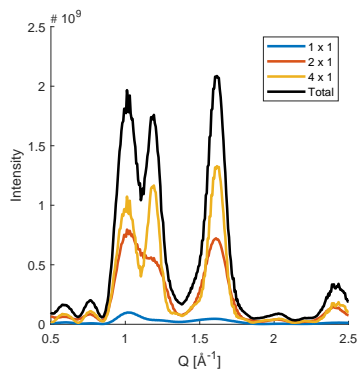

Sample #1

Vol% 1x1: 4.7

Vol% 2x1: 42.3

Vol% 4x1: 53.0

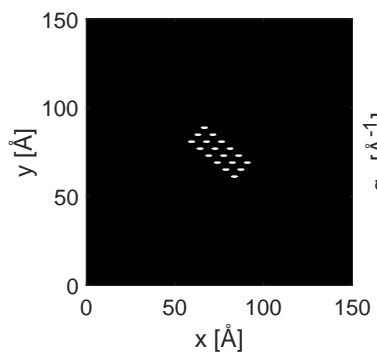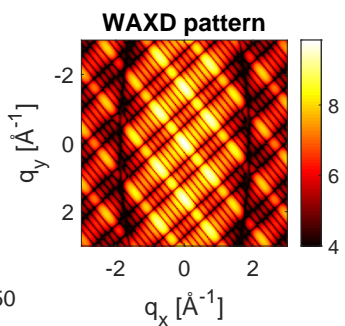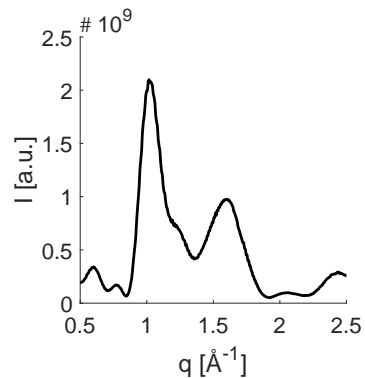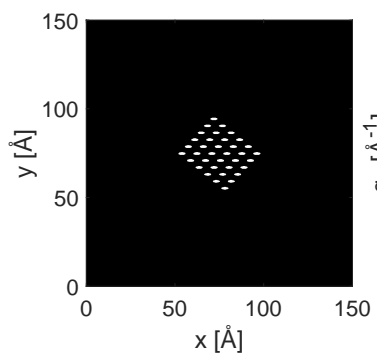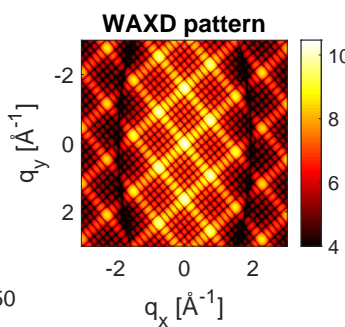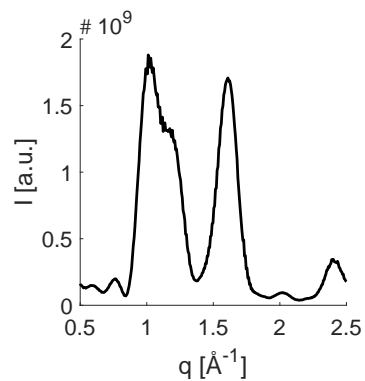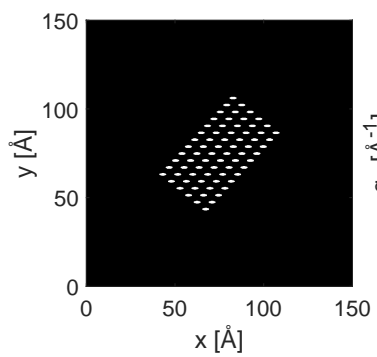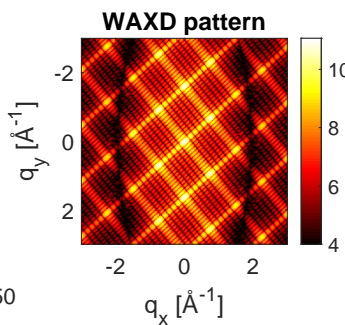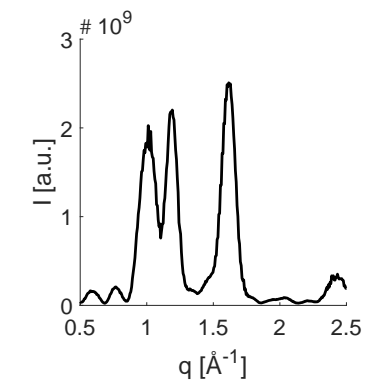

Model: R2-

Aggregation direction: (1-10)

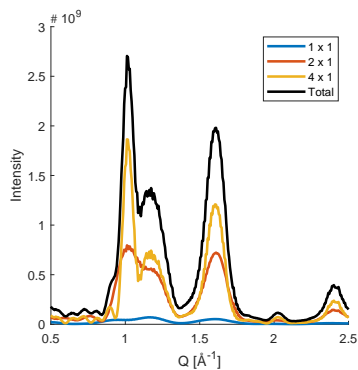

Sample #1

Vol% 1x1: 4.7

Vol% 2x1: 42.3

Vol% 4x1: 53.0

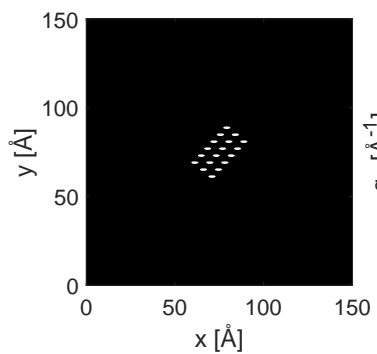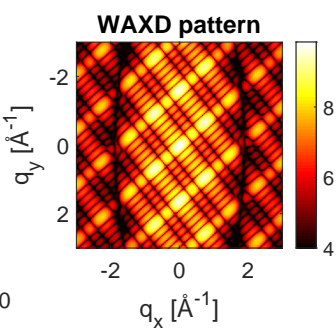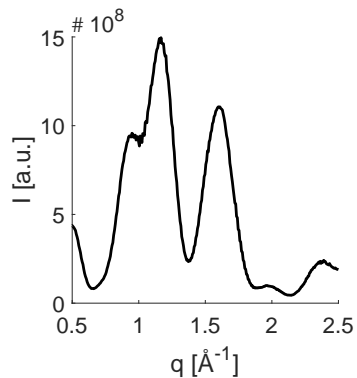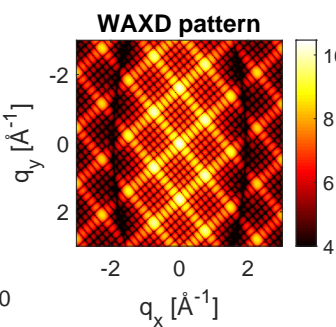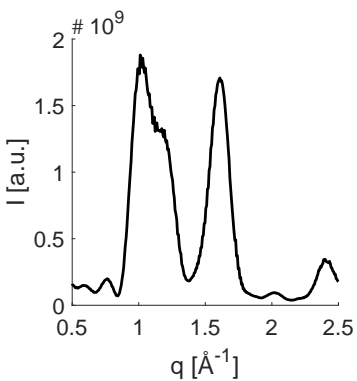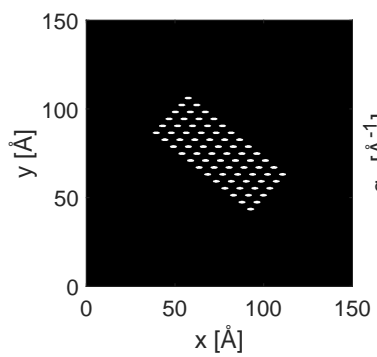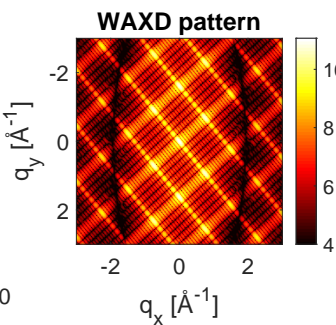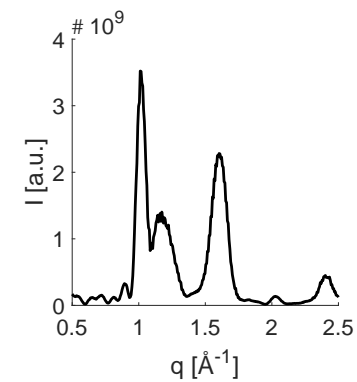



Model: R2-

Aggregation direction: (110)

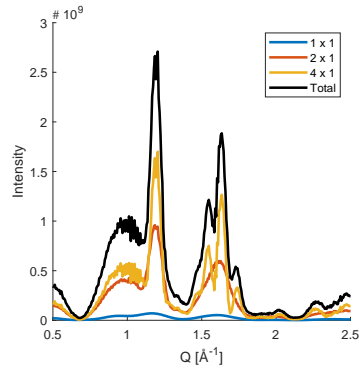

Sample #1

Vol% 1x1: 4.7

Vol% 2x1: 42.3

Vol% 4x1: 53.0

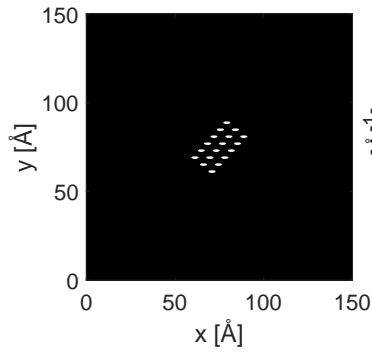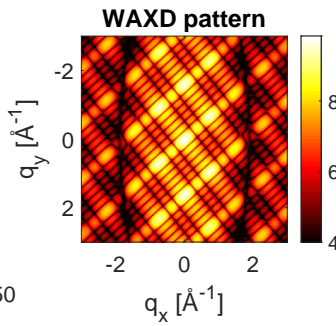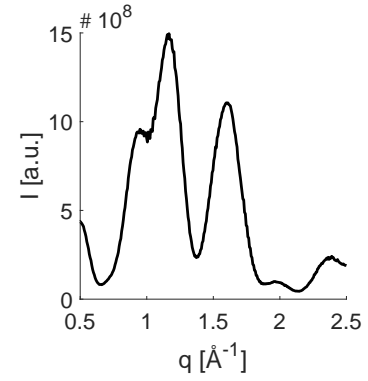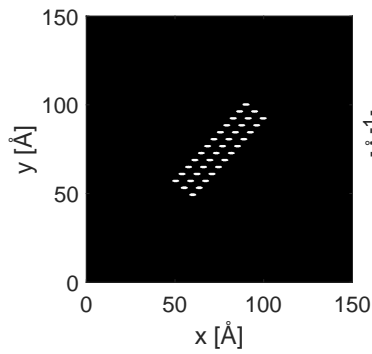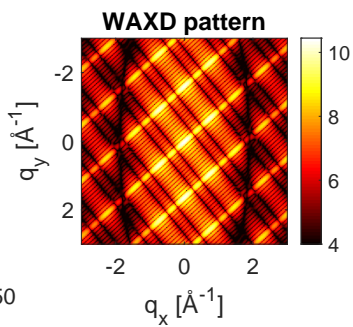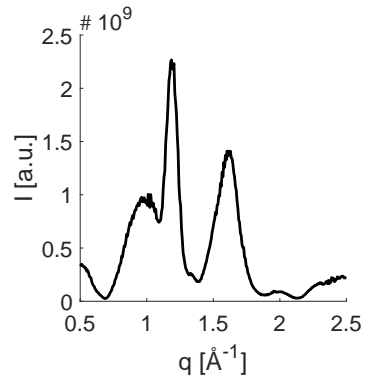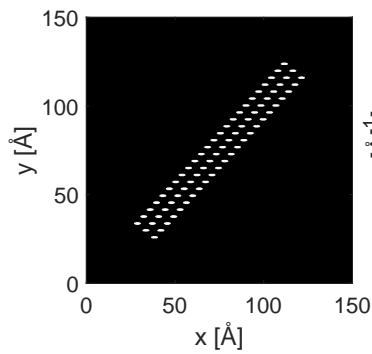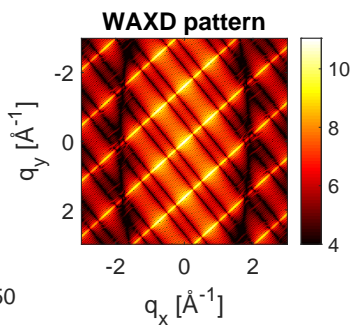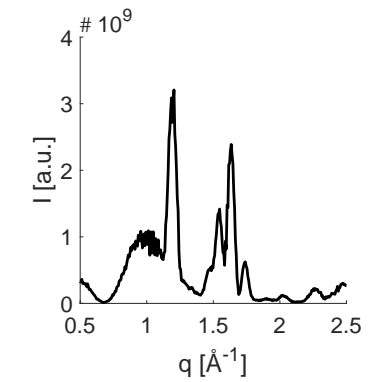

Model: Rh1+

Aggregation direction: (110)

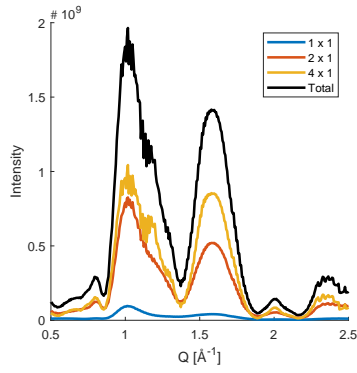

Sample #1

Vol% 1x1: 4.7

Vol% 2x1: 42.3

Vol% 4x1: 53.0

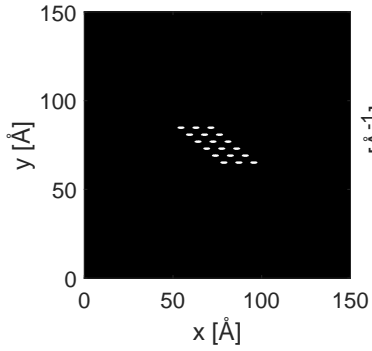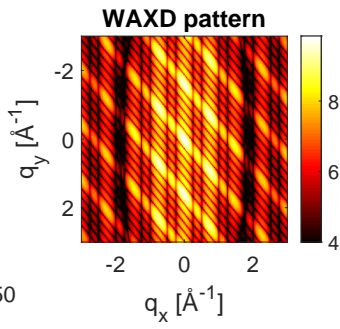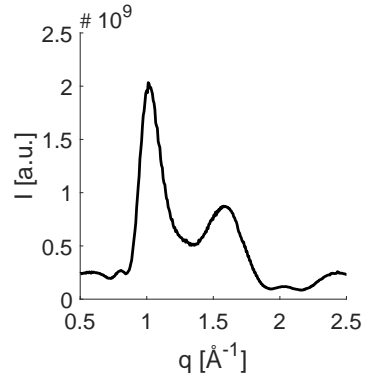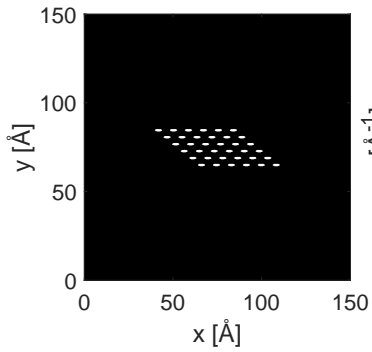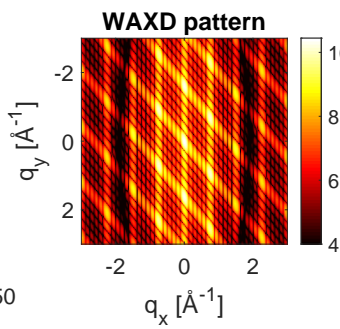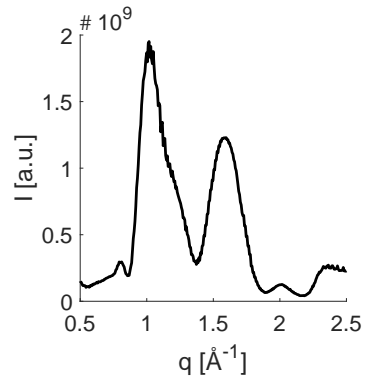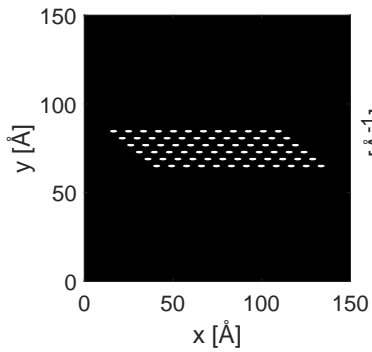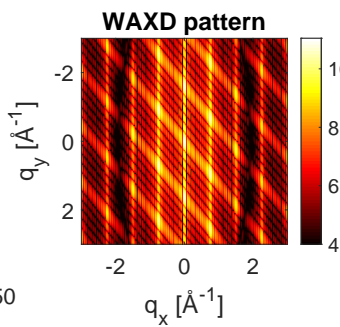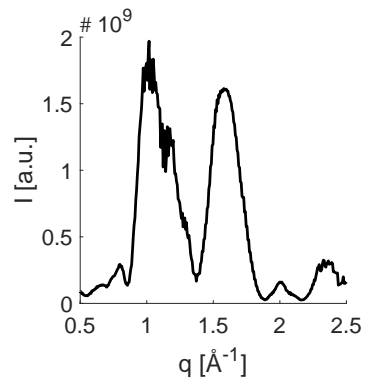

Model: Rh1+

Aggregation direction: (200)

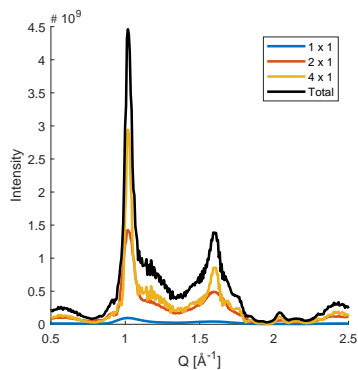

Sample #1

Vol% 1x1: 4.7

Vol% 2x1: 42.3

Vol% 4x1: 53.0

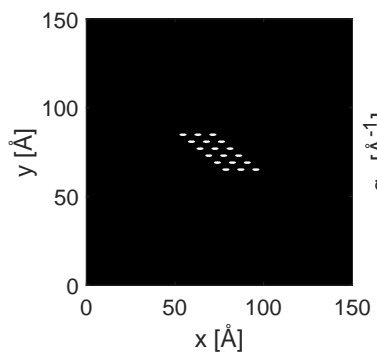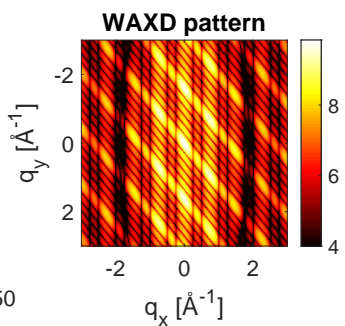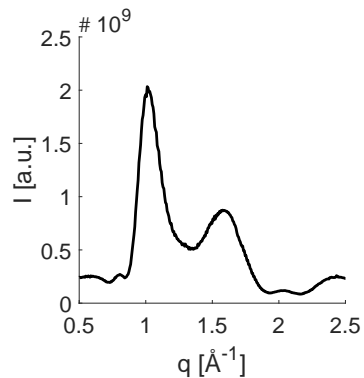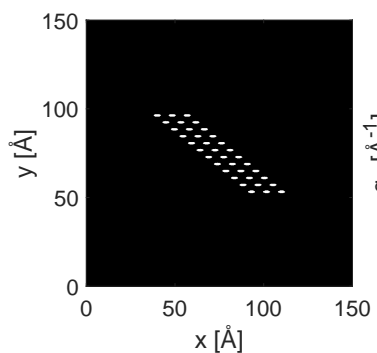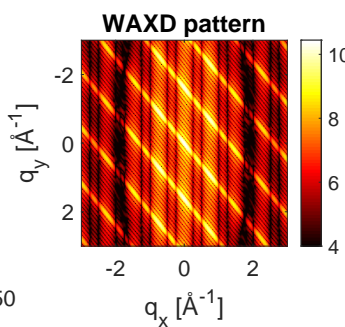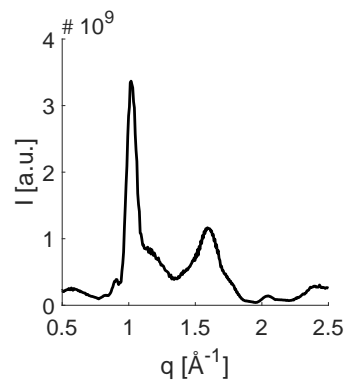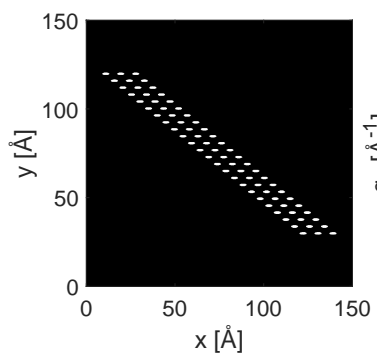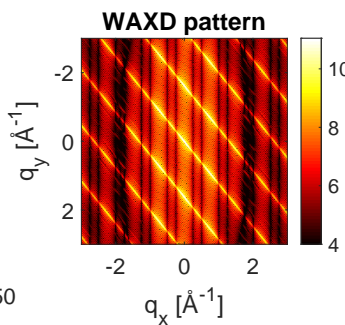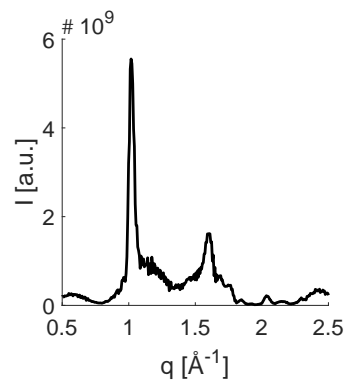

Model: Rh1-

Aggregation direction: (1-10)

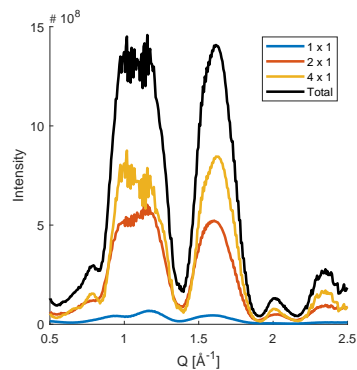

Sample #1

Vol% 1x1: 4.7

Vol% 2x1: 42.3

Vol% 4x1: 53.0

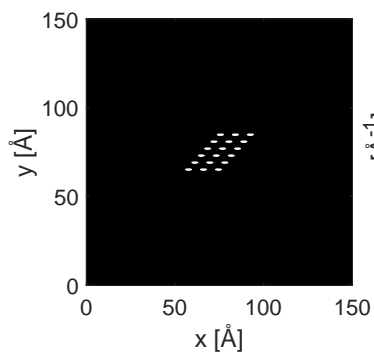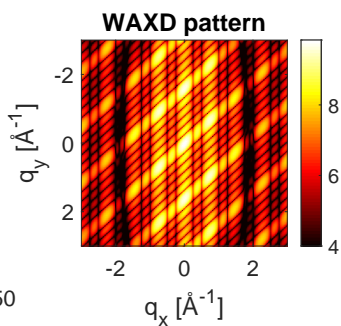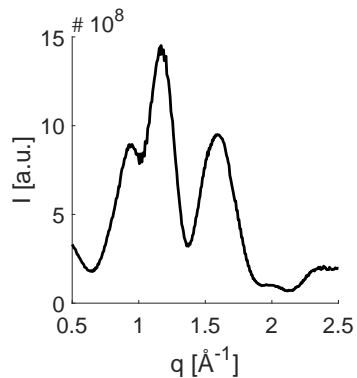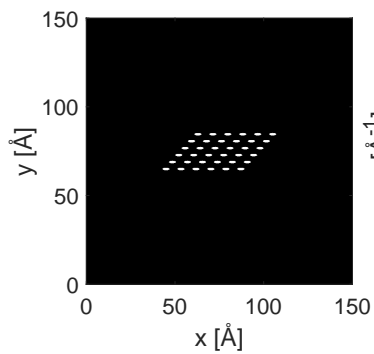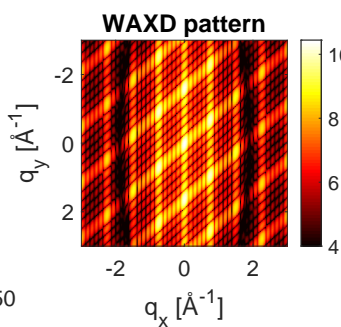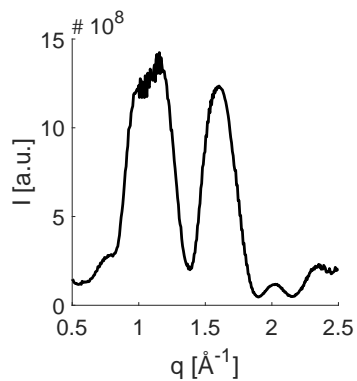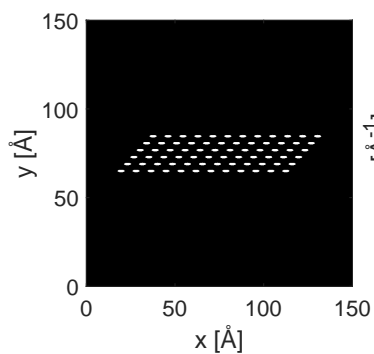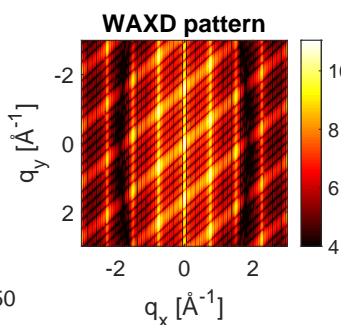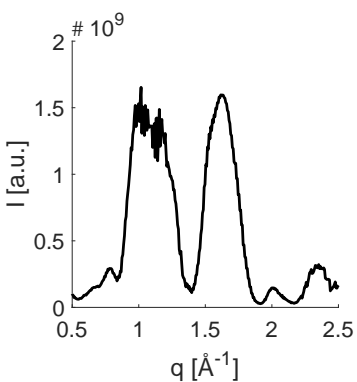

Model: Rh1-

Aggregation direction: (200)

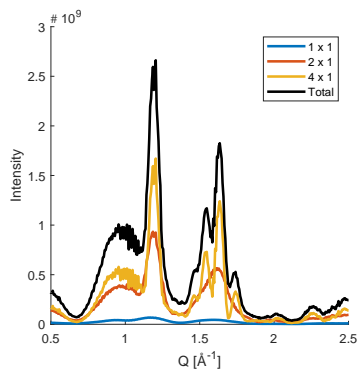

Sample #1

Vol% 1x1: 4.7

Vol% 2x1: 42.3

Vol% 4x1: 53.0

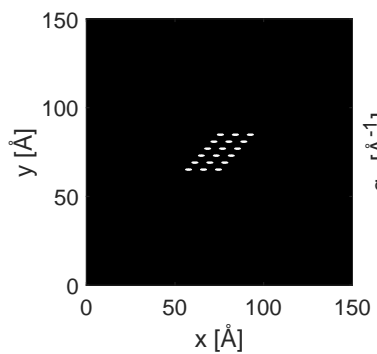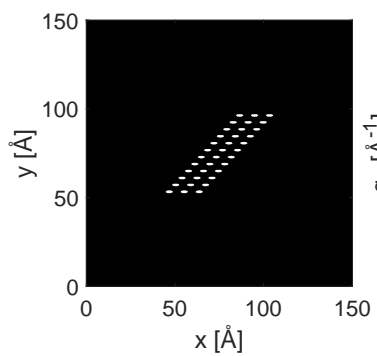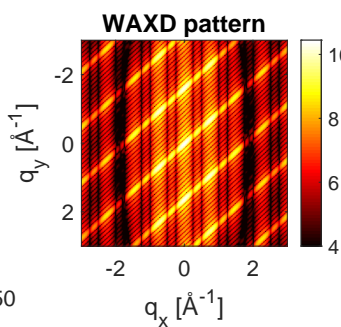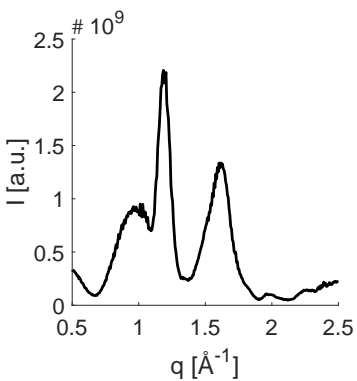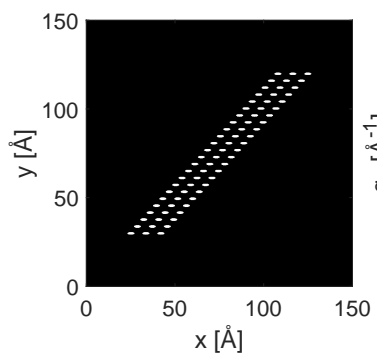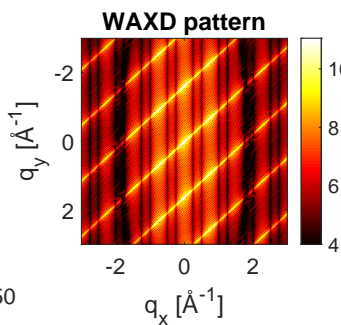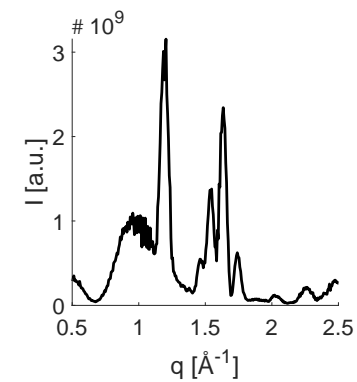

Model: Rh2

Aggregation direction: (010)

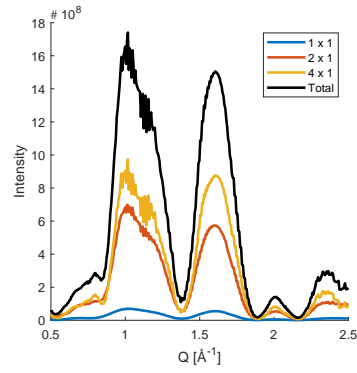

Sample #1

Vol% 1x1: 4.7

Vol% 2x1: 42.3

Vol% 4x1: 53.0

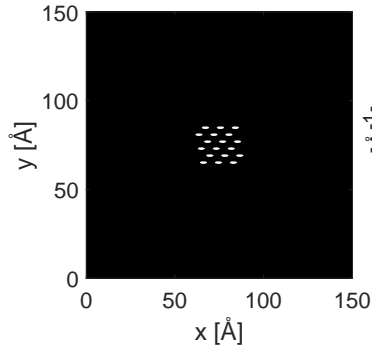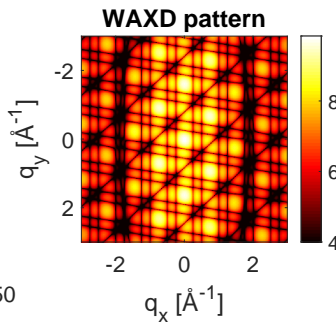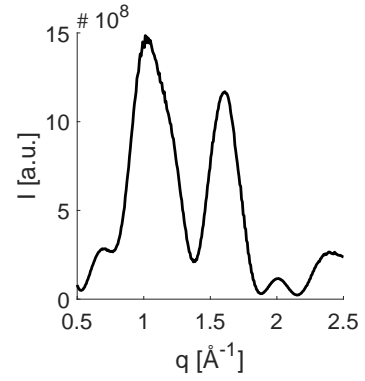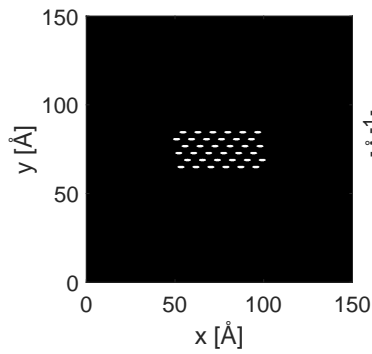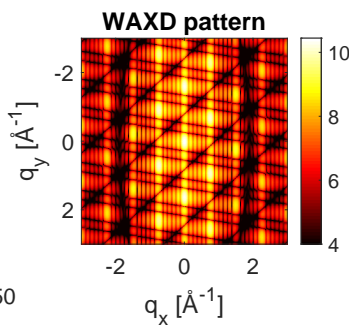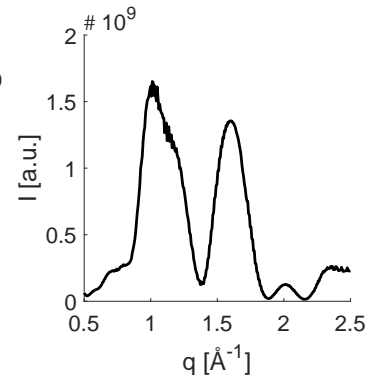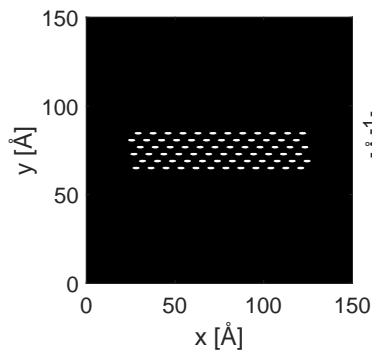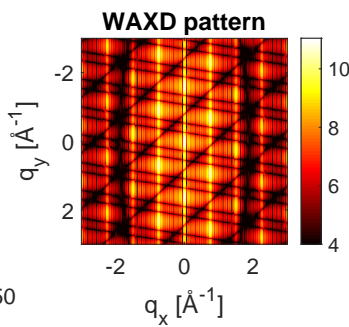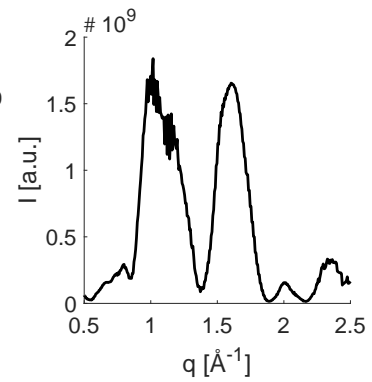

Model: Rh2

Aggregation direction: (200)

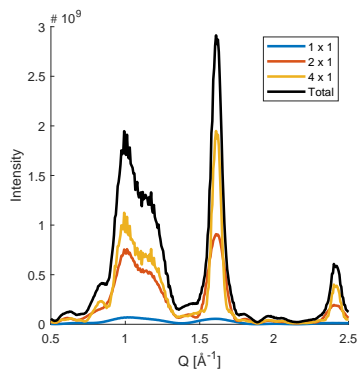

Sample #1

Vol% 1x1: 4.7

Vol% 2x1: 42.3

Vol% 4x1: 53.0

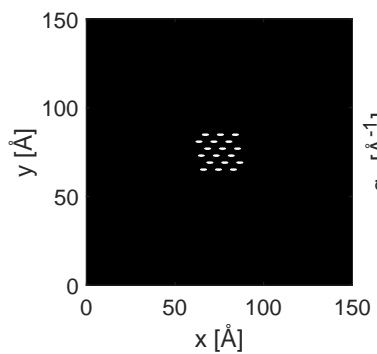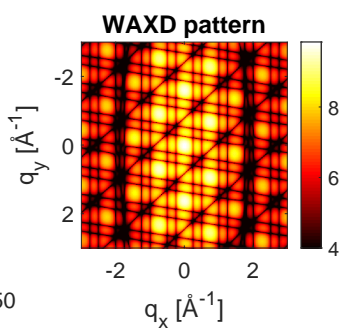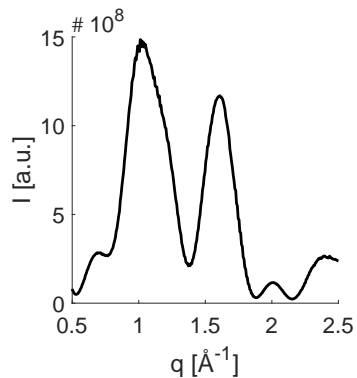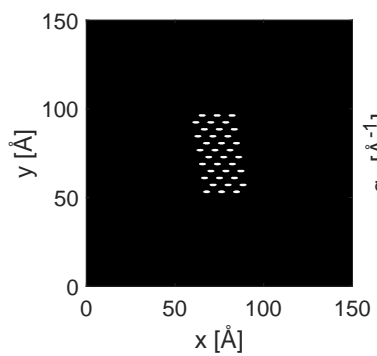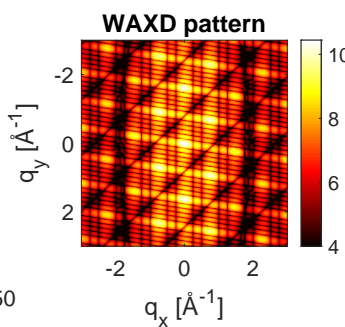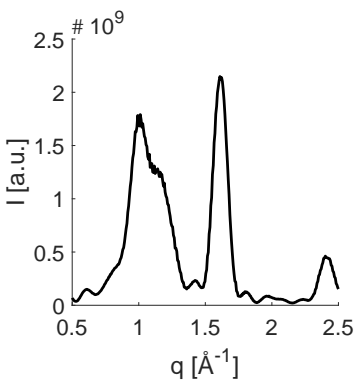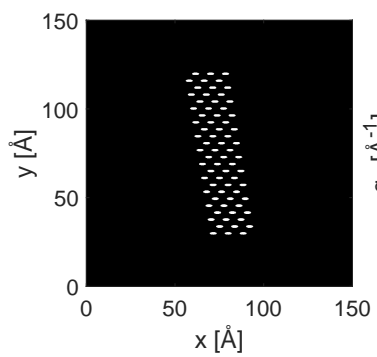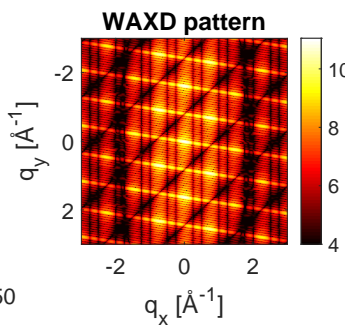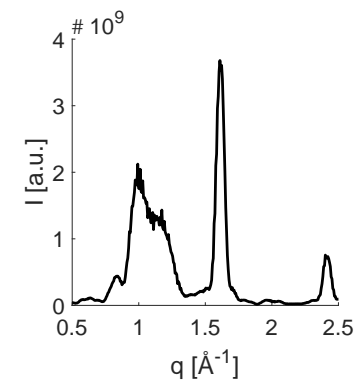

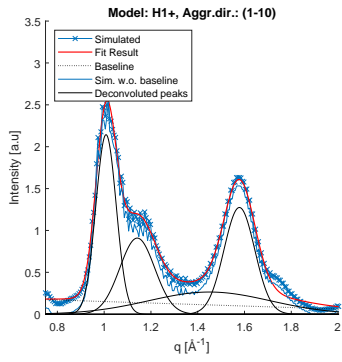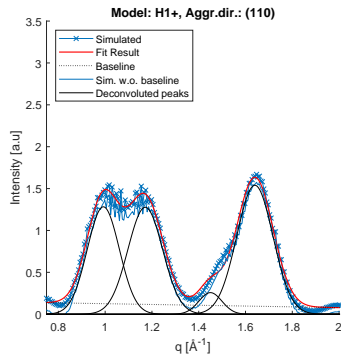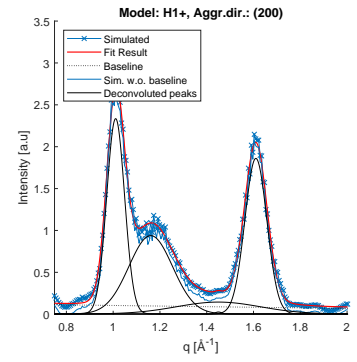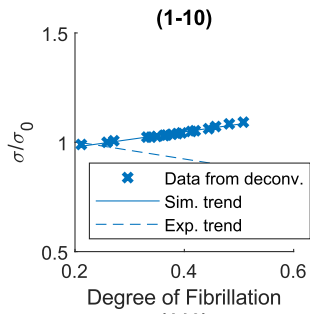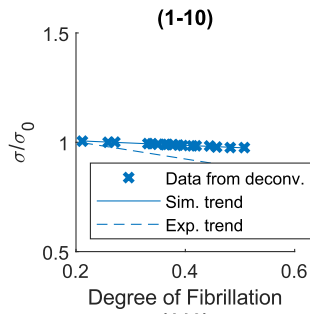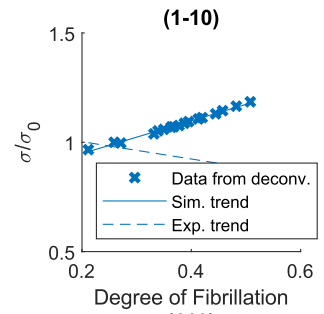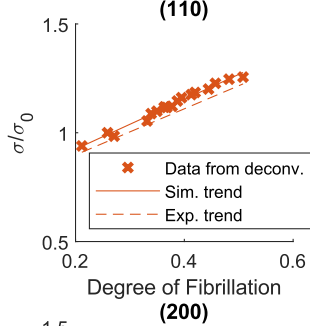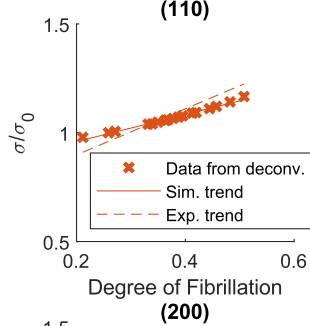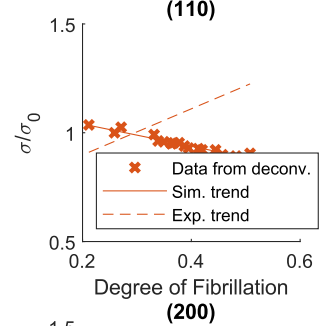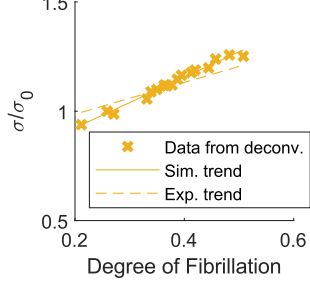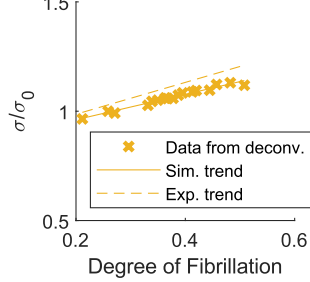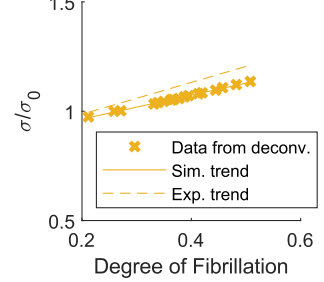



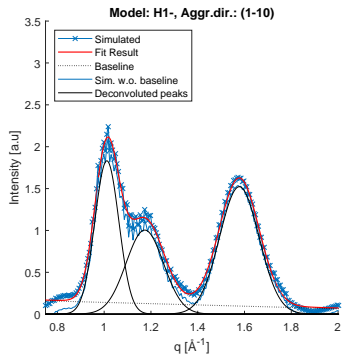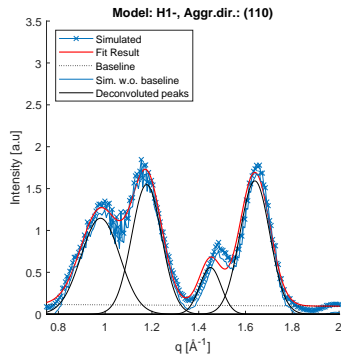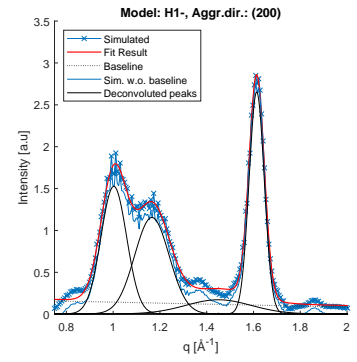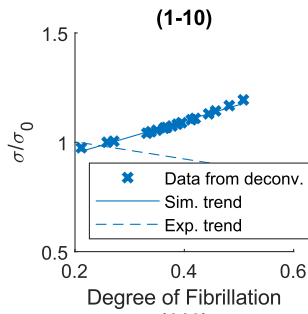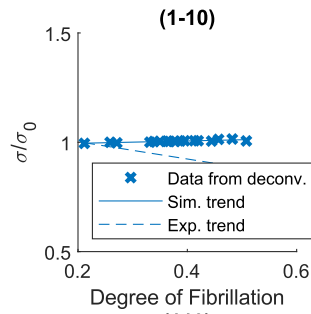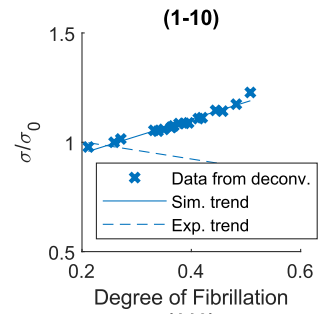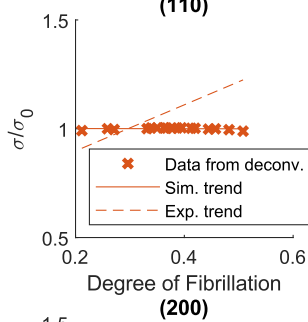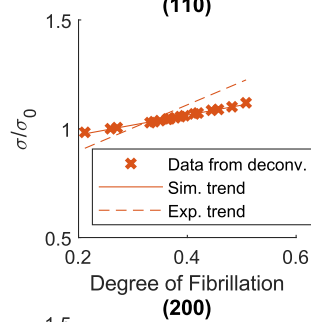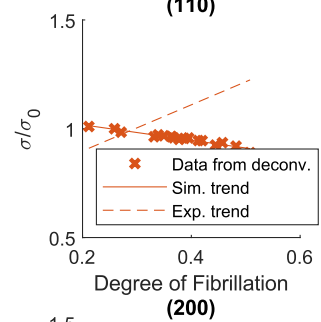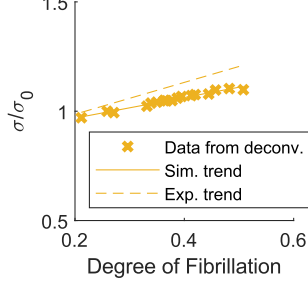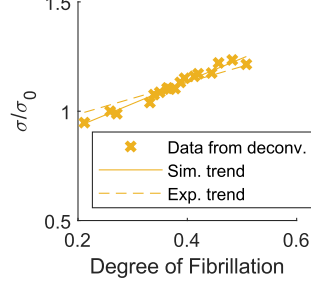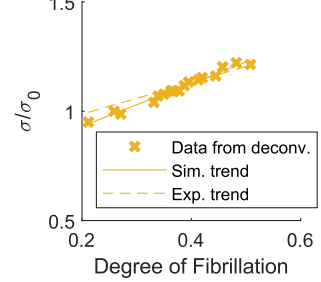

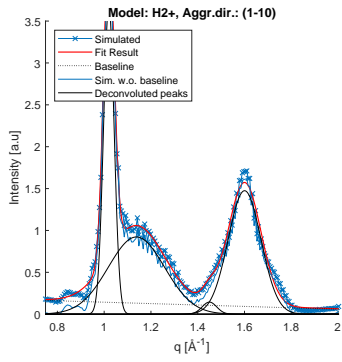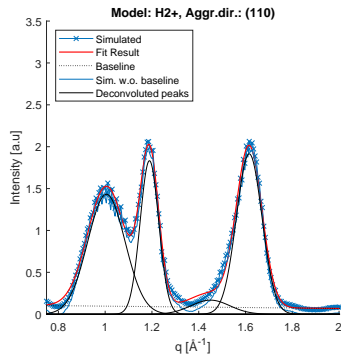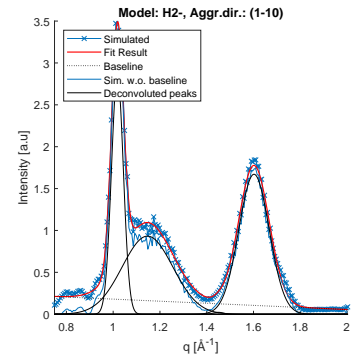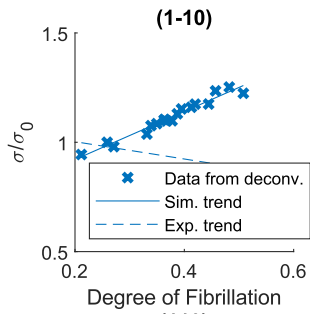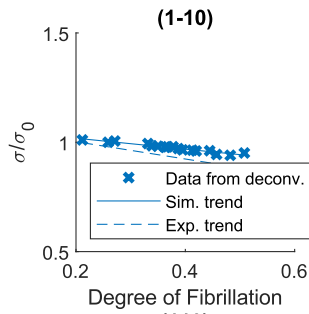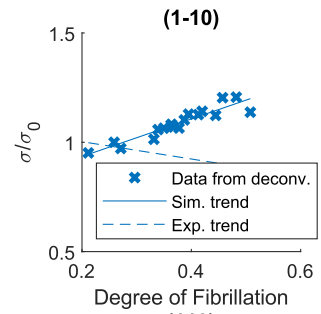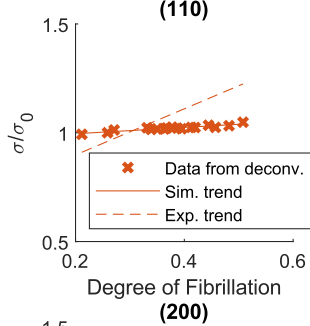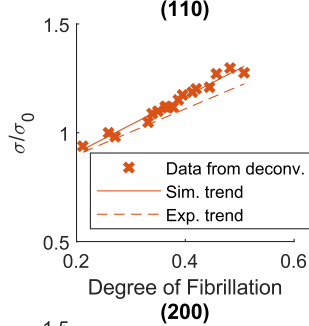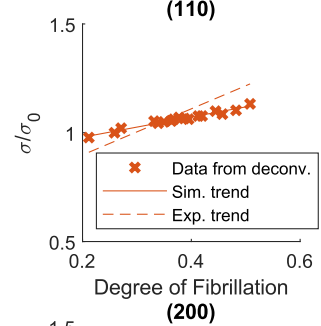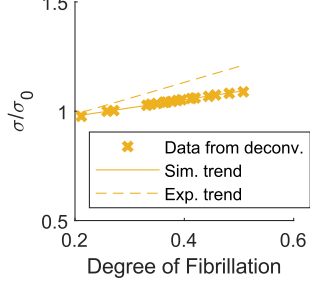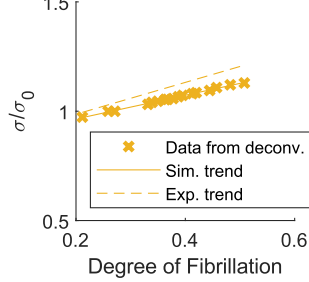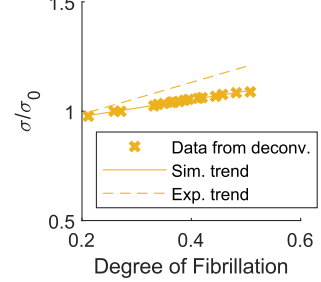

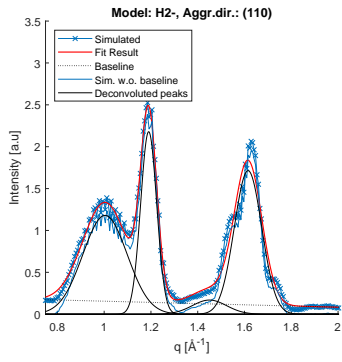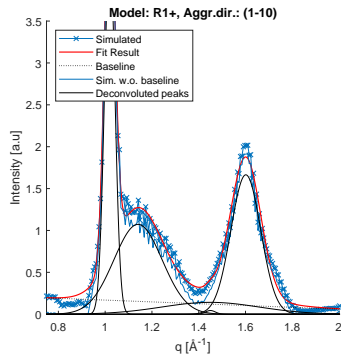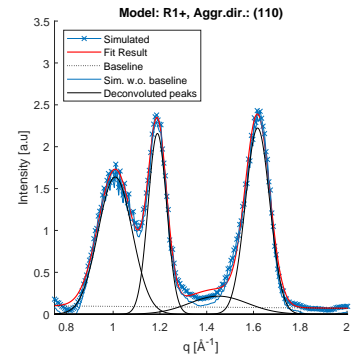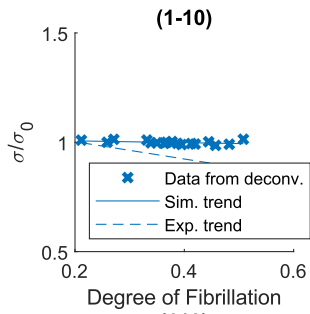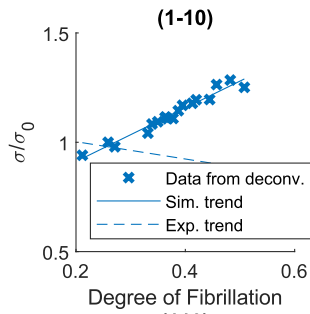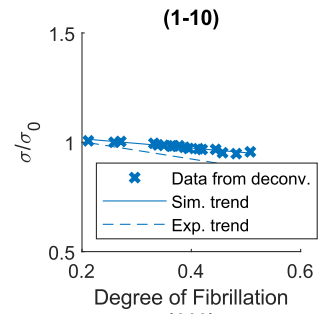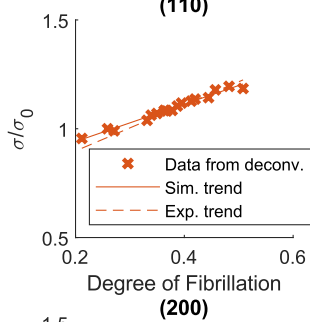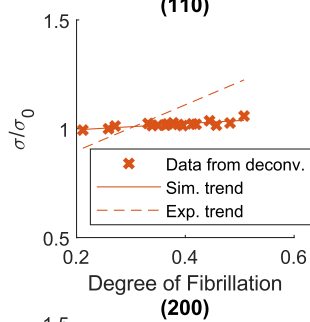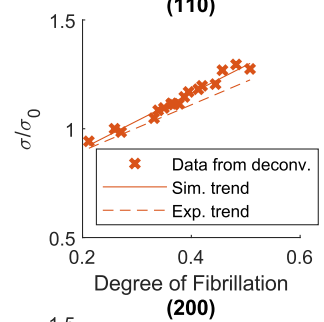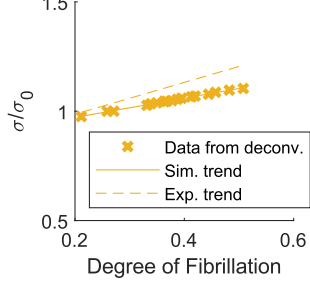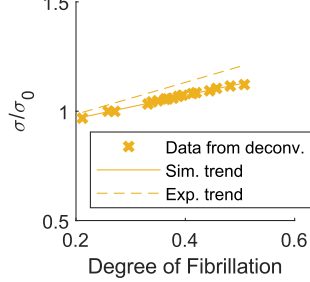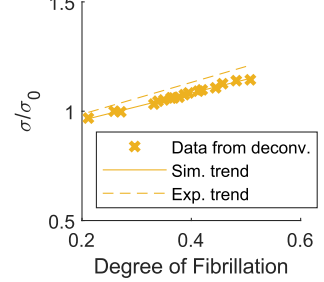

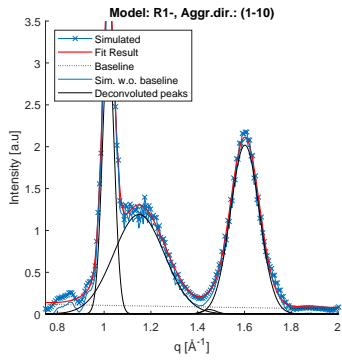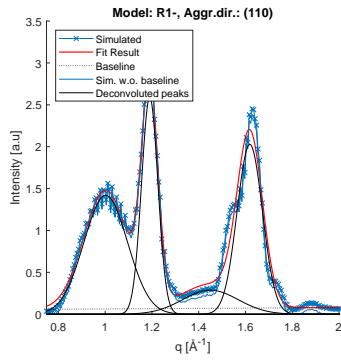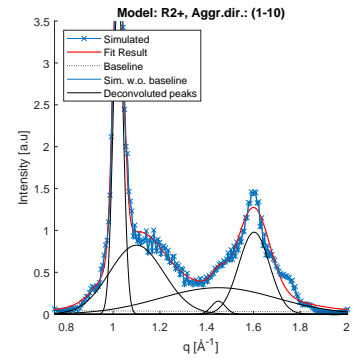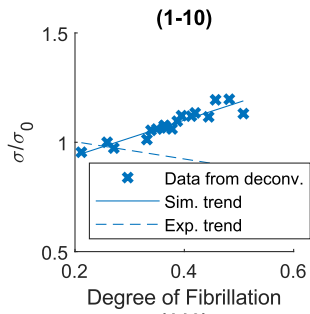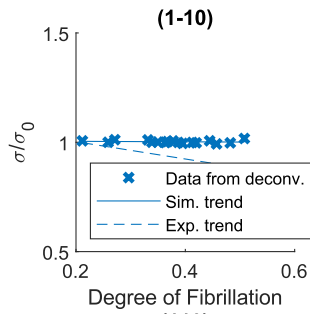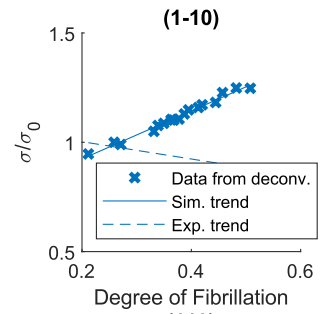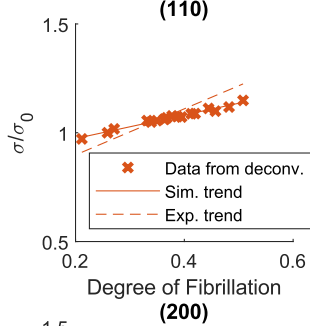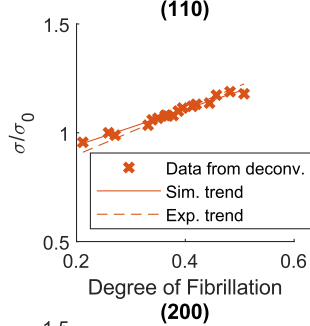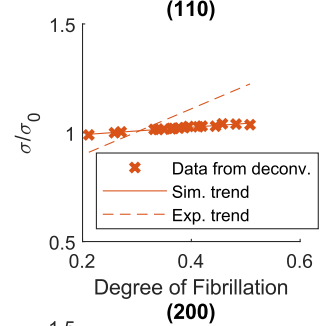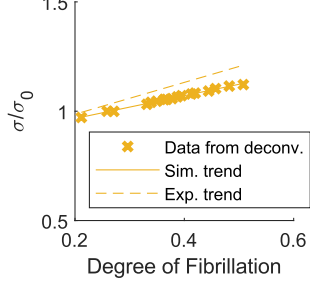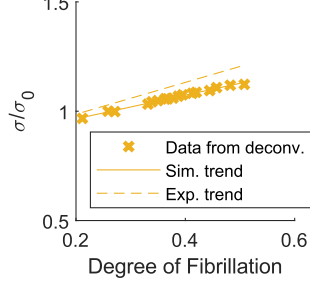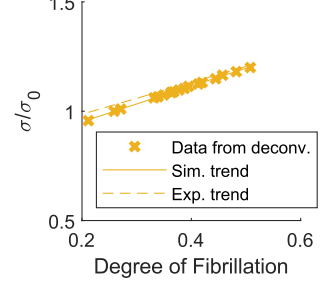

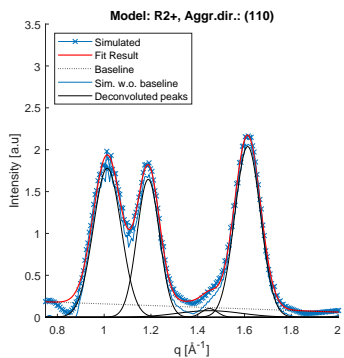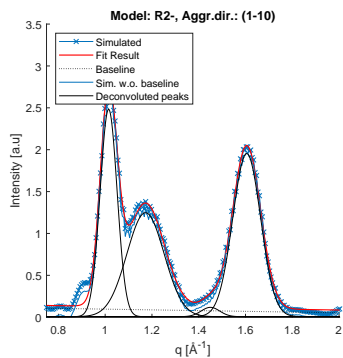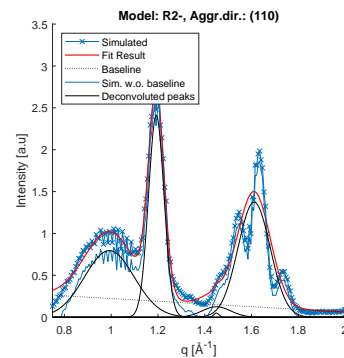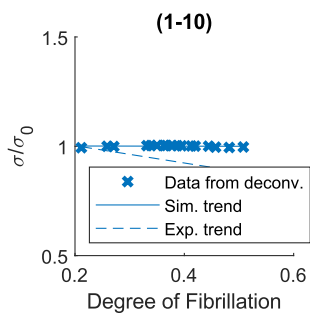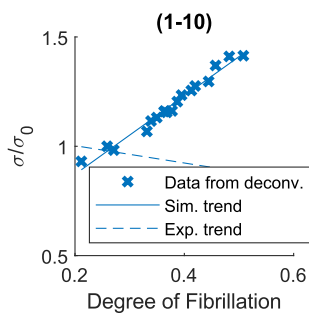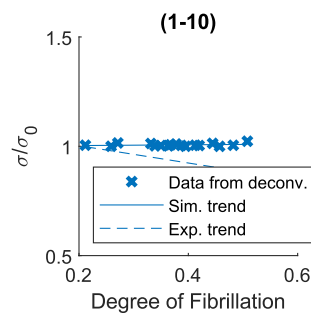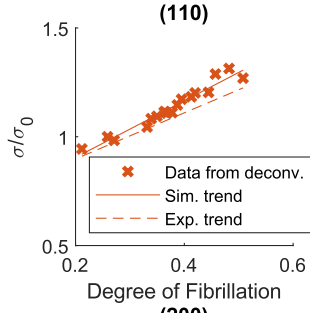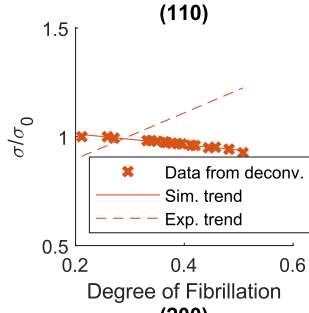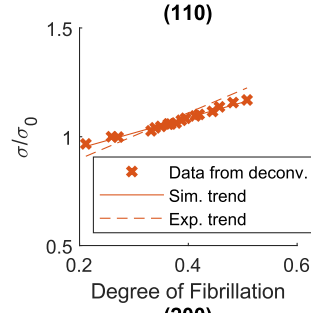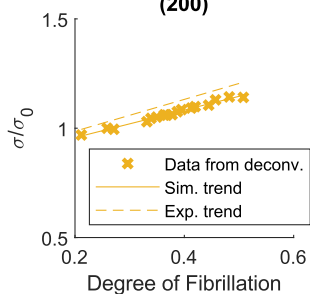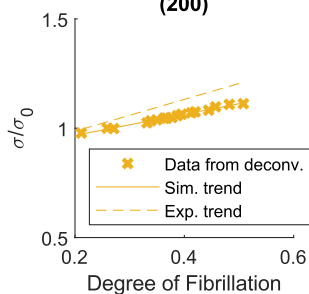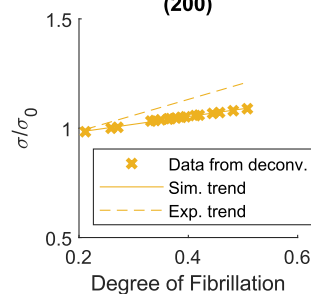

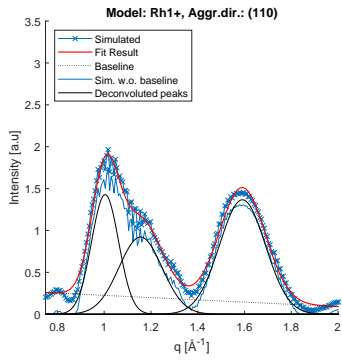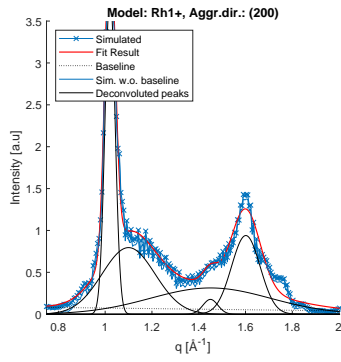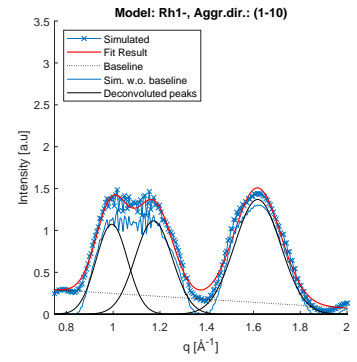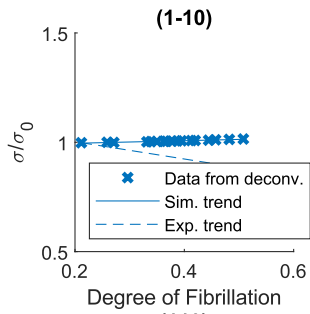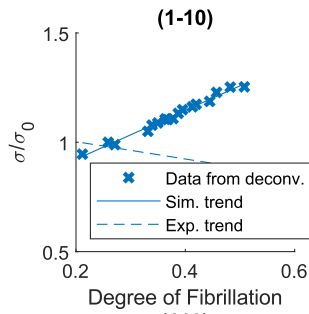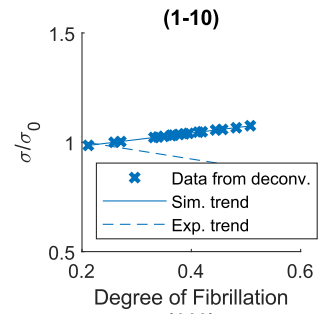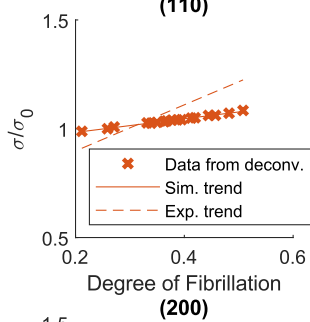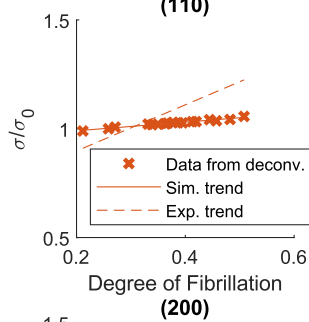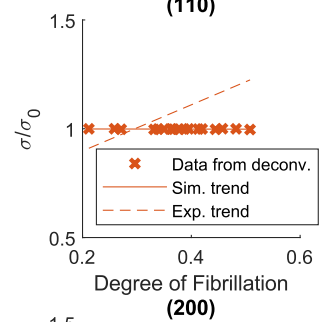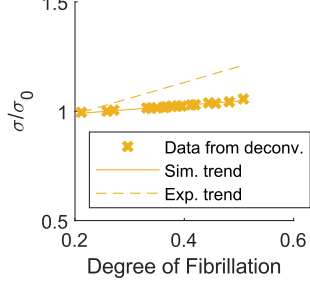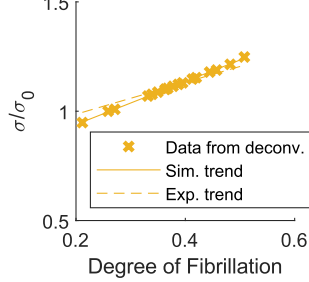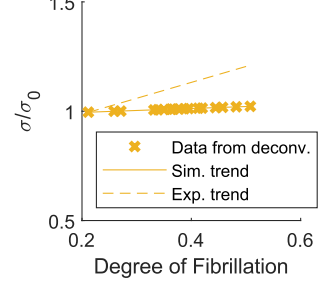

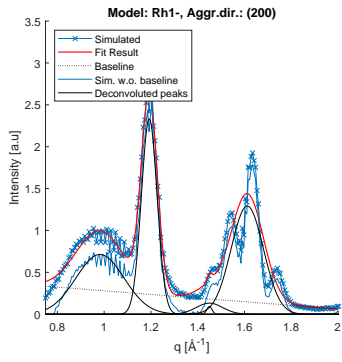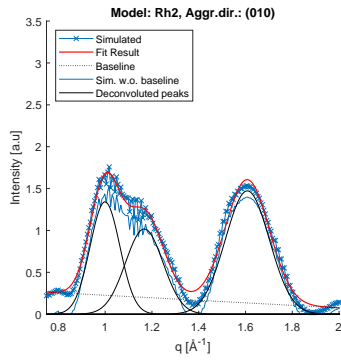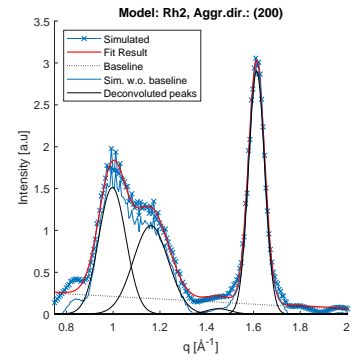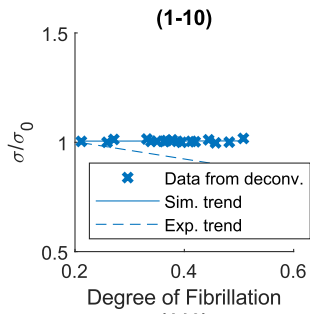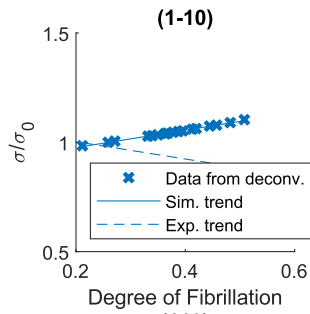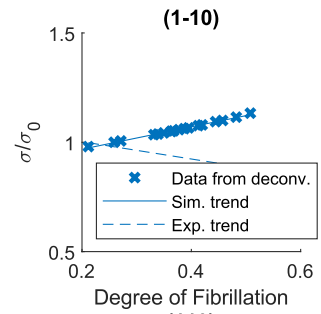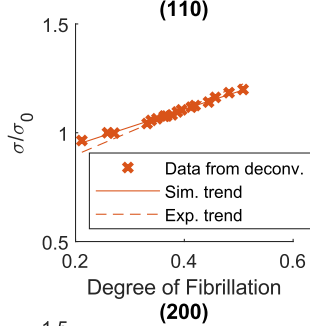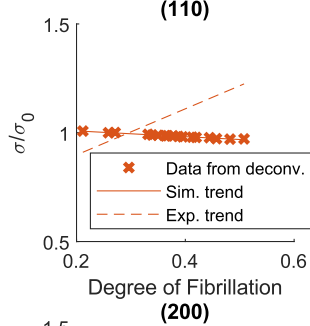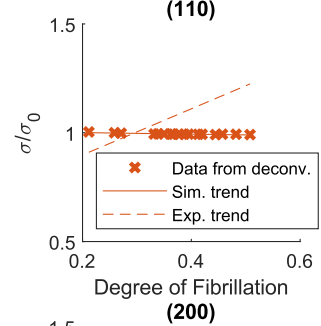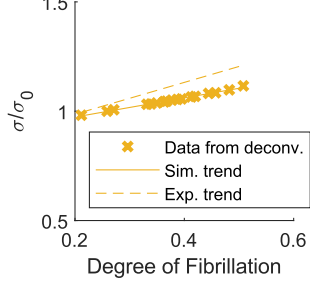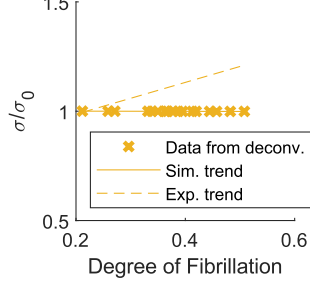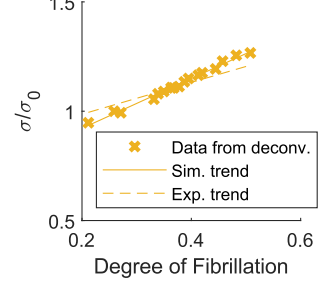

## **WAXD simulations: Results**

**Form factor of a CNF chain with semi-axes**

**3 Å x 0.5 Å**



Model: H1+

Aggregation direction: (1-10)

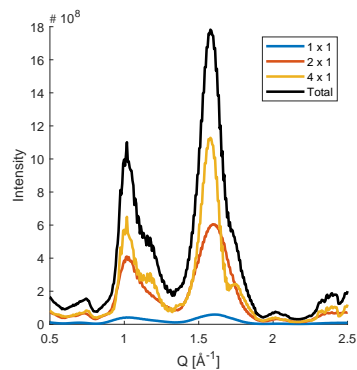

Sample #1

Vol% 1x1: 4.7

Vol% 2x1: 42.3

Vol% 4x1: 53.0

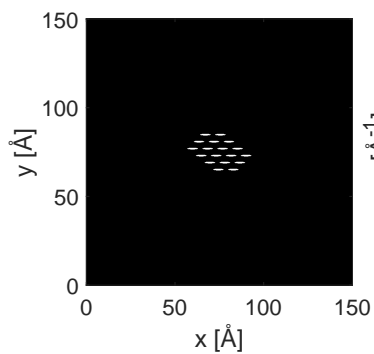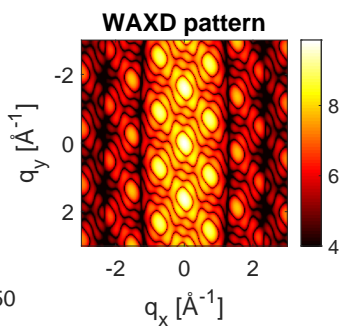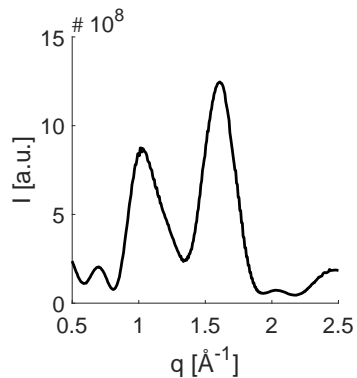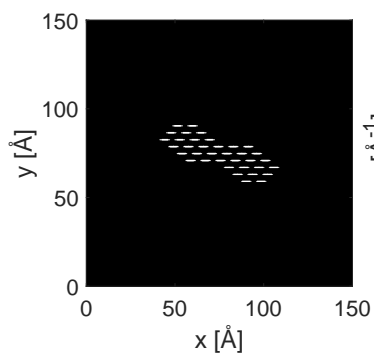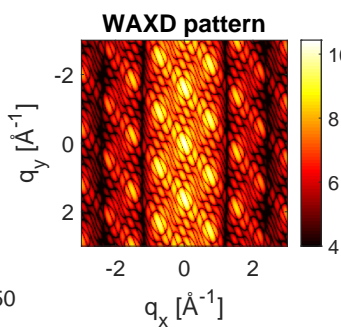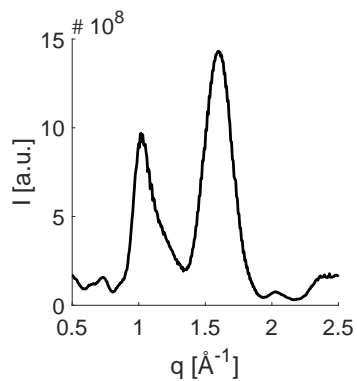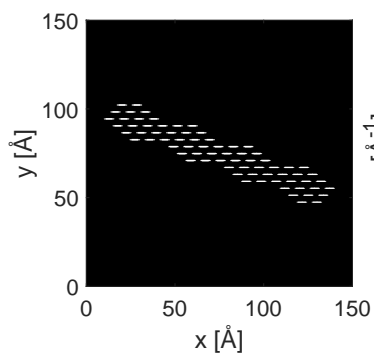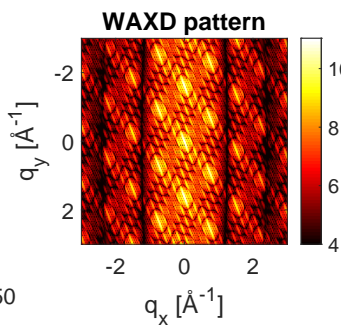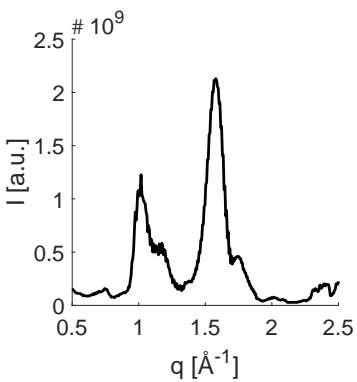

Model: H1+

Aggregation direction: (110)

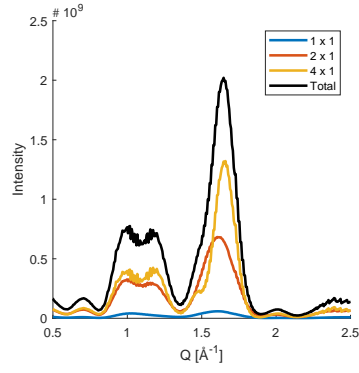

Sample #1

Vol% 1x1: 4.7

Vol% 2x1: 42.3

Vol% 4x1: 53.0

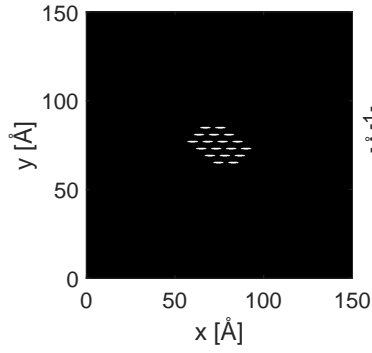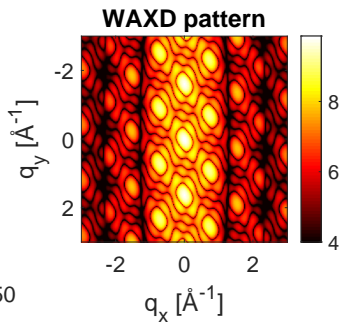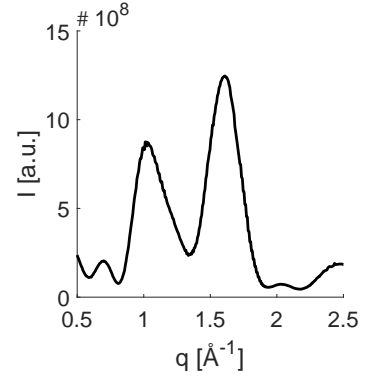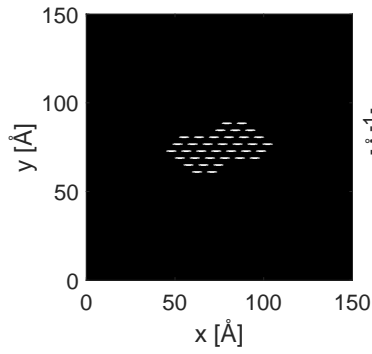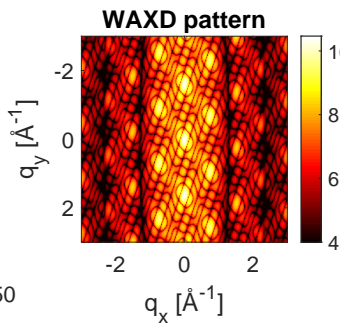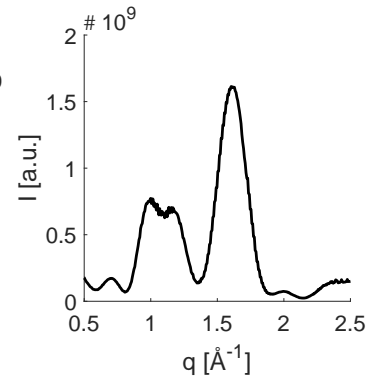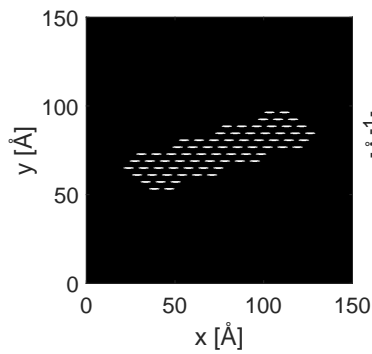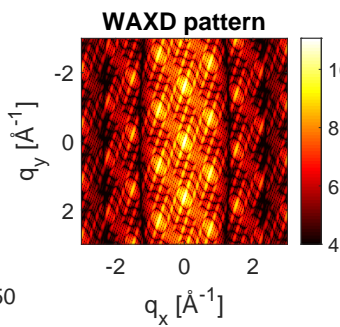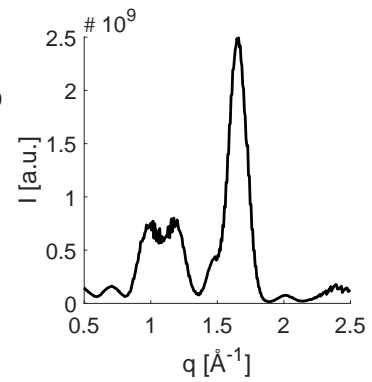

Model: H1+

Aggregation direction: (200)

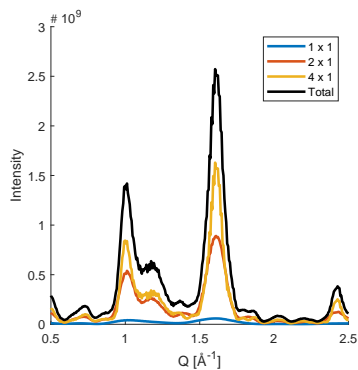

Sample #1

Vol% 1x1: 4.7

Vol% 2x1: 42.3

Vol% 4x1: 53.0

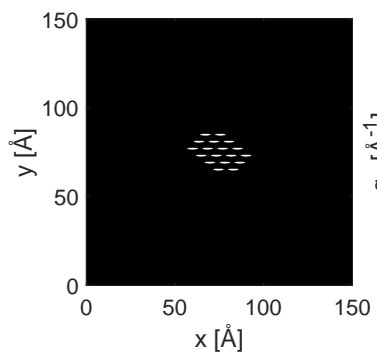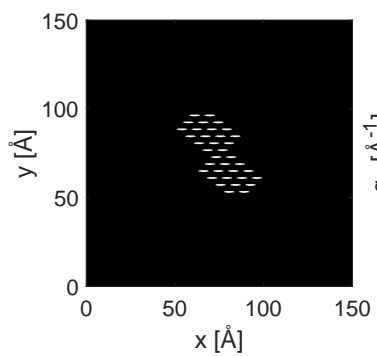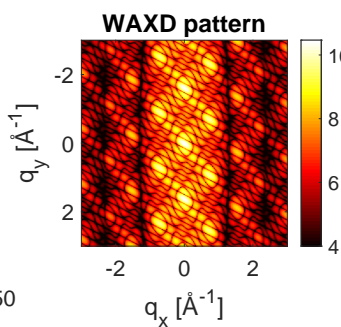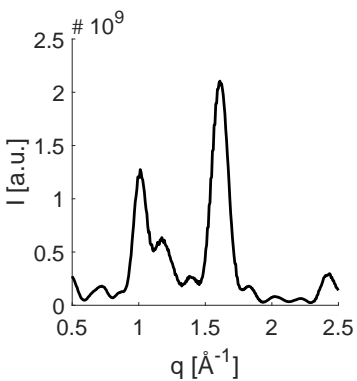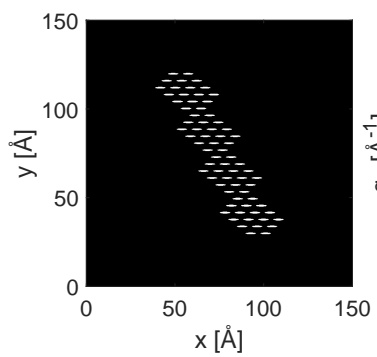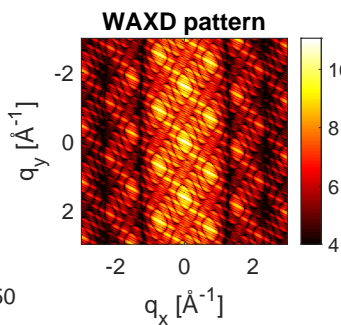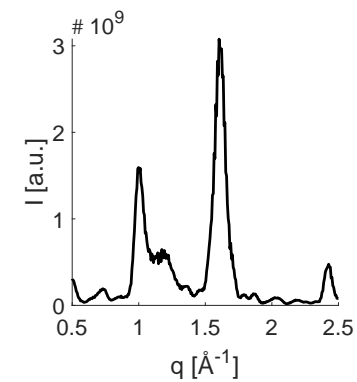

Model: H1-

Aggregation direction: (1-10)

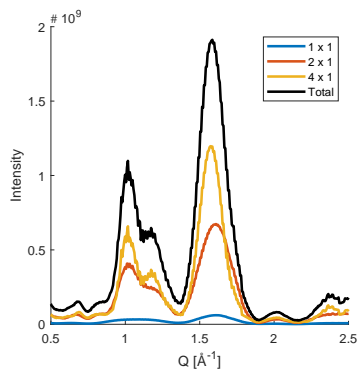

Sample #1

Vol% 1x1: 4.7

Vol% 2x1: 42.3

Vol% 4x1: 53.0

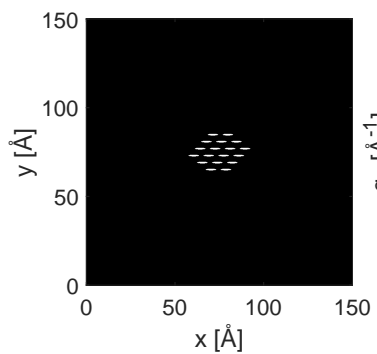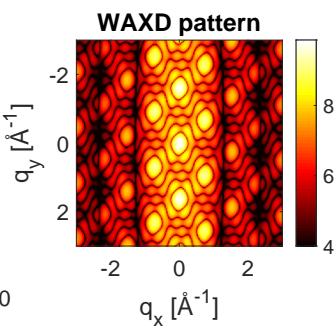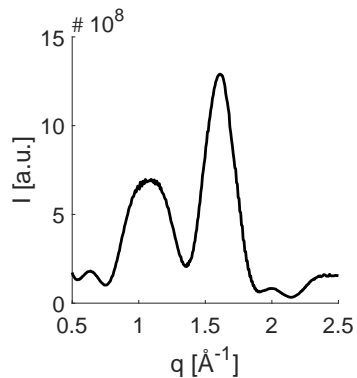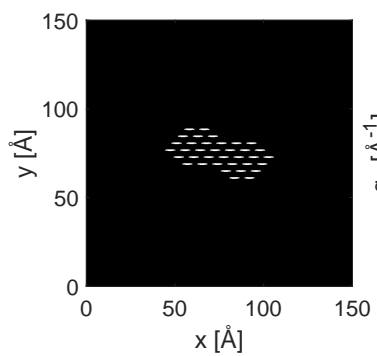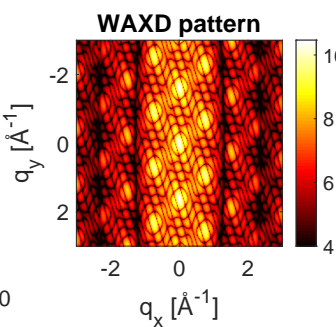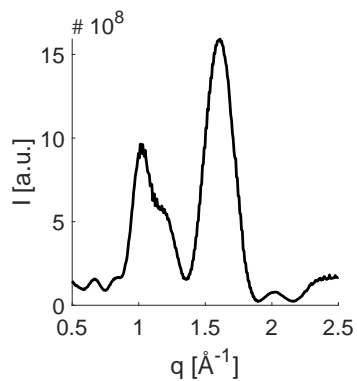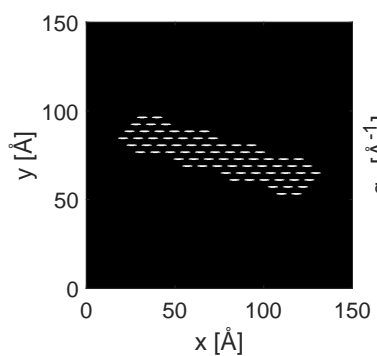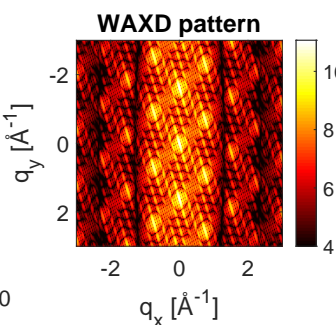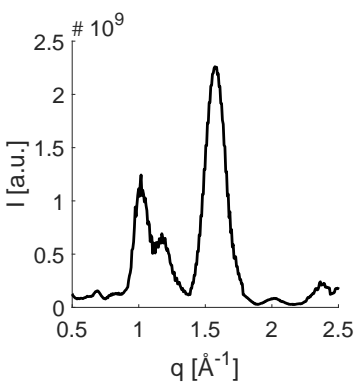

Model: H1-

Aggregation direction: (110)

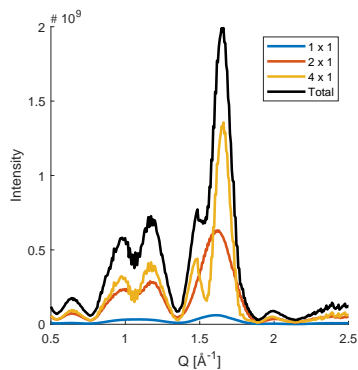

Sample #1

Vol% 1x1: 4.7

Vol% 2x1: 42.3

Vol% 4x1: 53.0

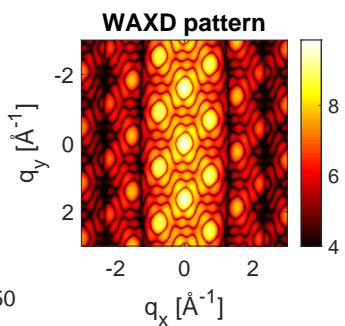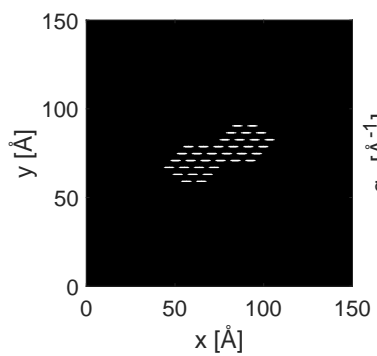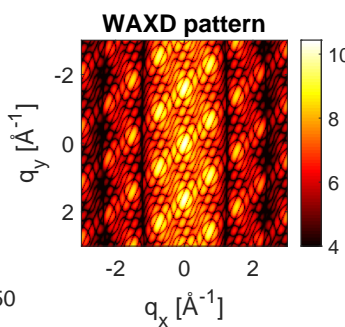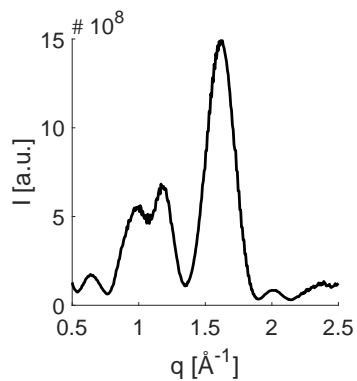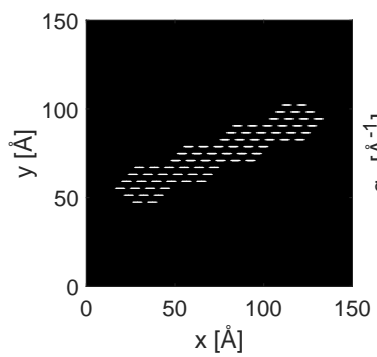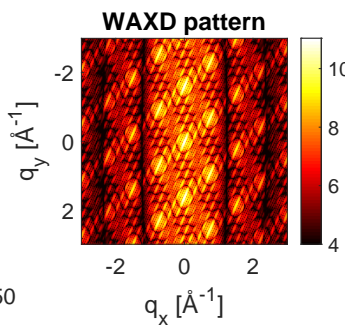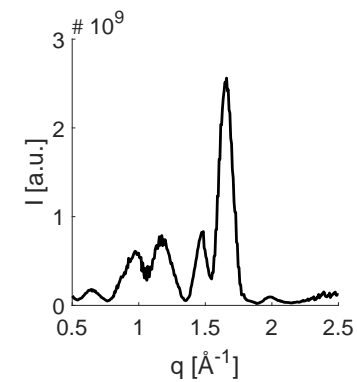

Model: H1-

Aggregation direction: (200)

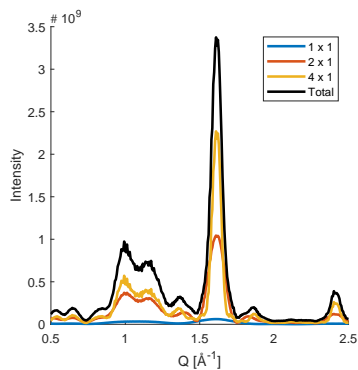

Sample #1

Vol% 1x1: 4.7

Vol% 2x1: 42.3

Vol% 4x1: 53.0



WAXD pattern

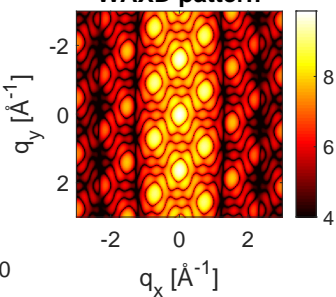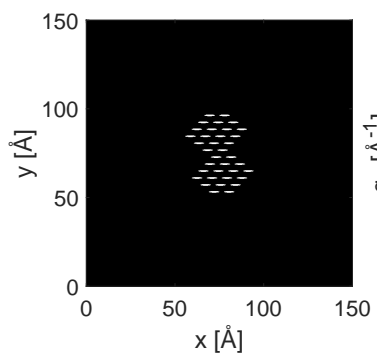

WAXD pattern

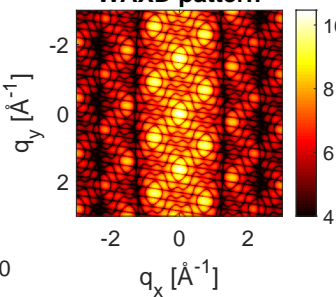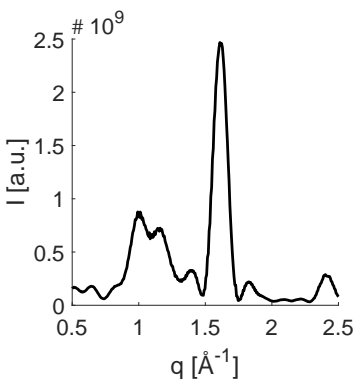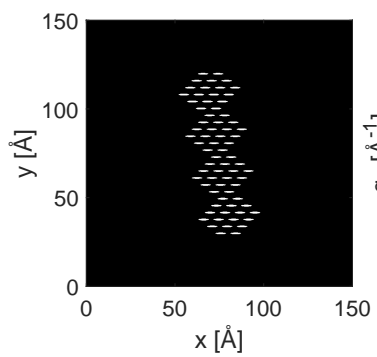

WAXD pattern

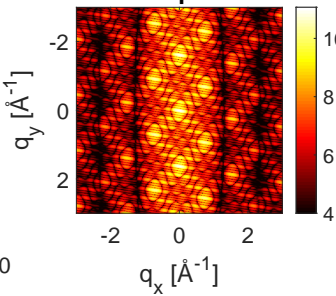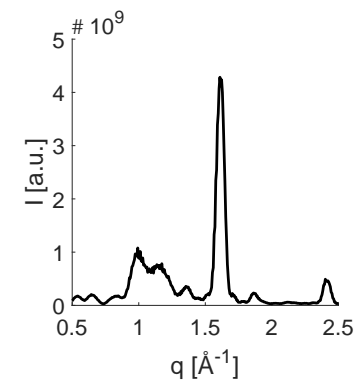

Model: H2+

Aggregation direction: (1-10)

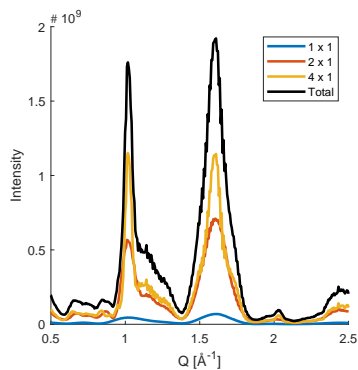

Sample #1

Vol% 1x1: 4.7

Vol% 2x1: 42.3

Vol% 4x1: 53.0

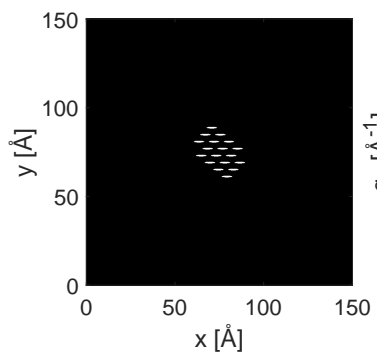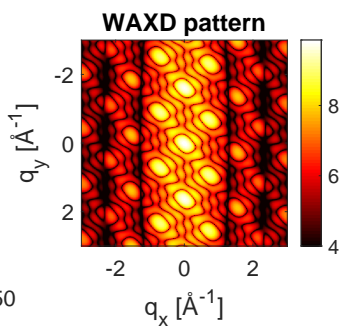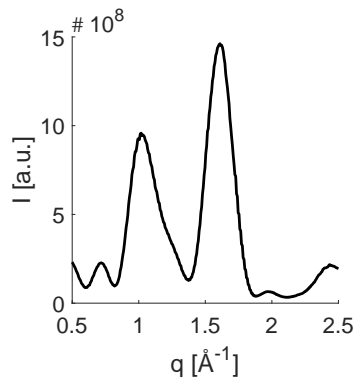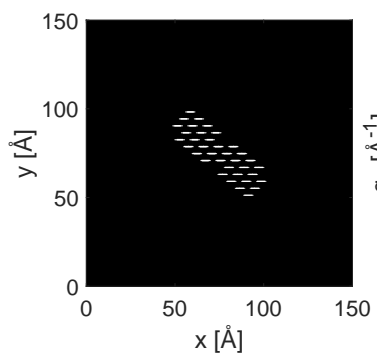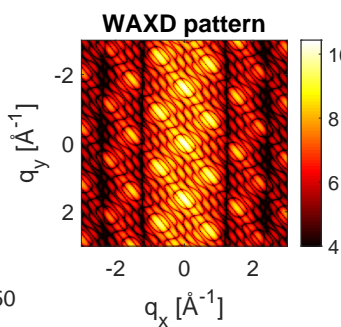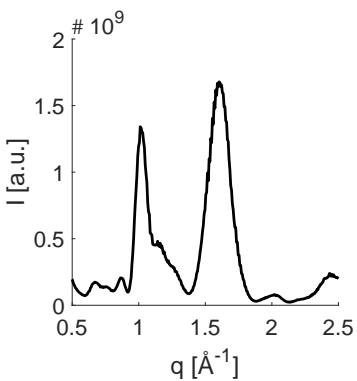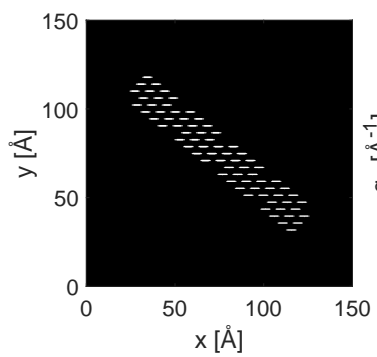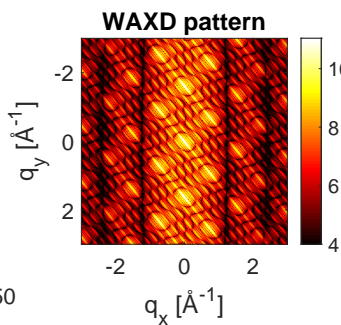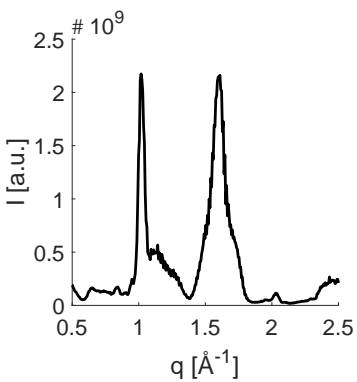

Model: H2+

Aggregation direction: (110)

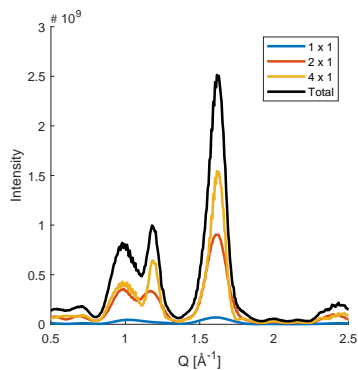

Sample #1

Vol% 1x1: 4.7

Vol% 2x1: 42.3

Vol% 4x1: 53.0

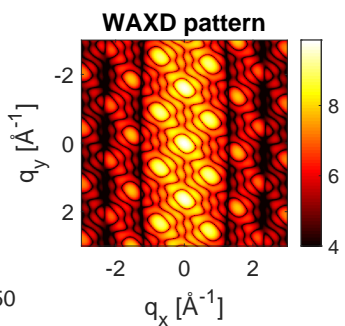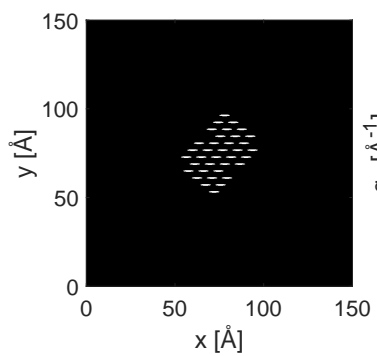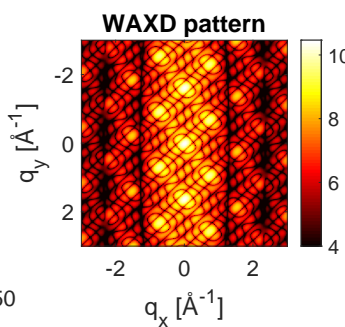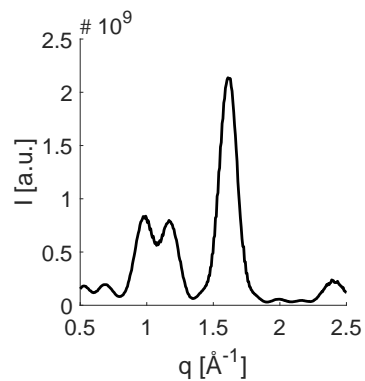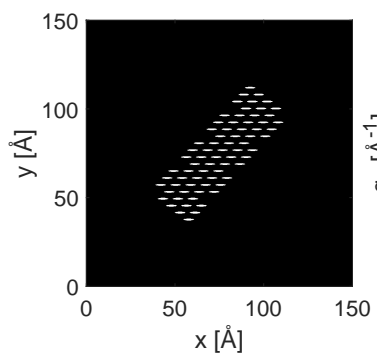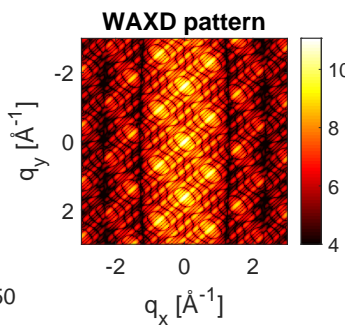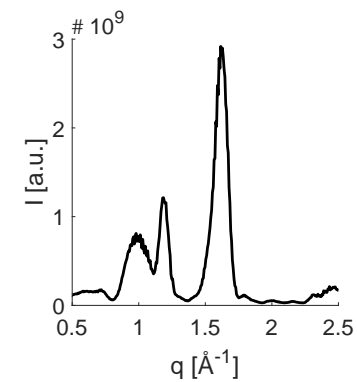



Model: H2-

Aggregation direction: (1-10)

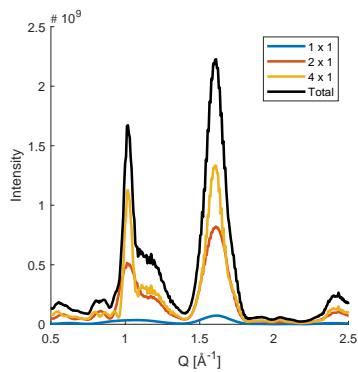

Sample #1

Vol% 1x1: 4.7

Vol% 2x1: 42.3

Vol% 4x1: 53.0

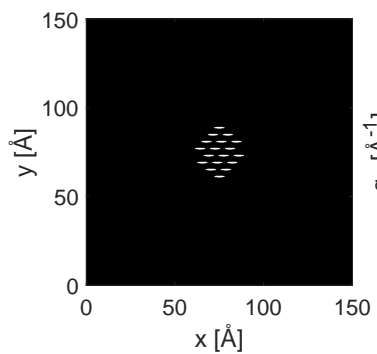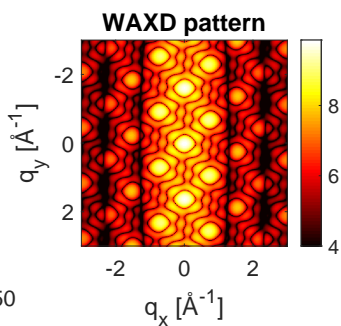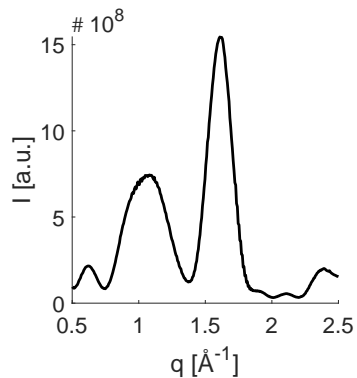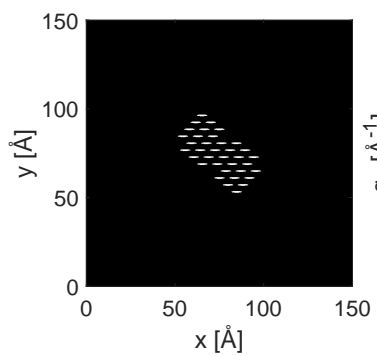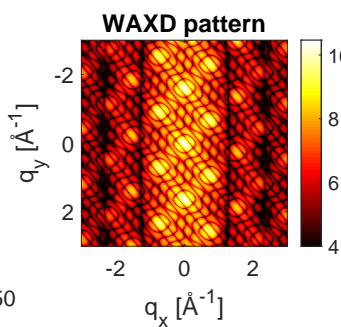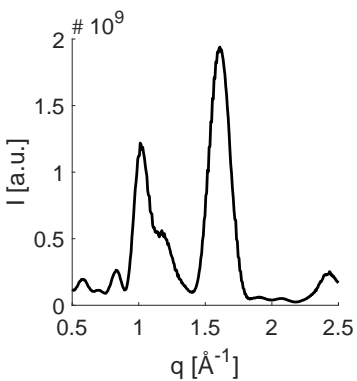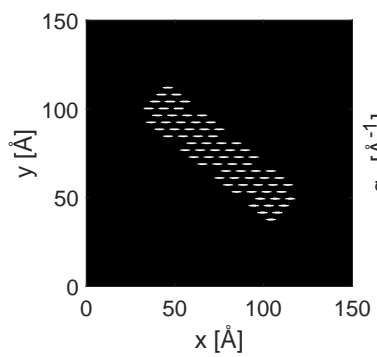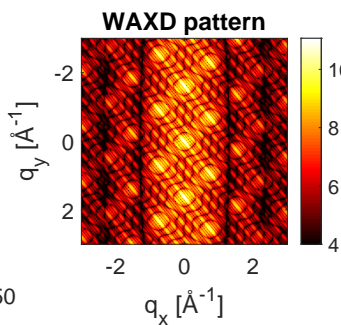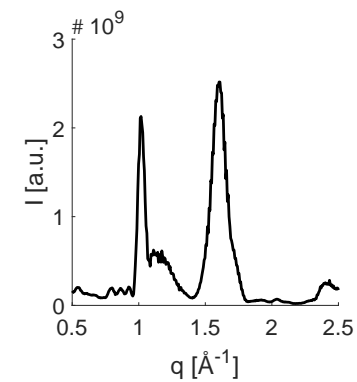

Model: H2-

Aggregation direction: (110)

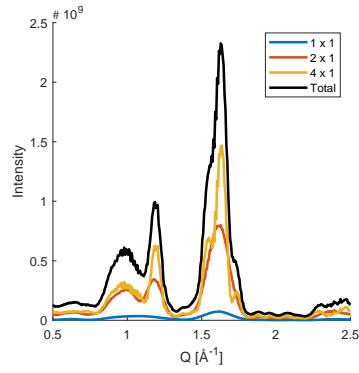

Sample #1

Vol% 1x1: 4.7

Vol% 2x1: 42.3

Vol% 4x1: 53.0

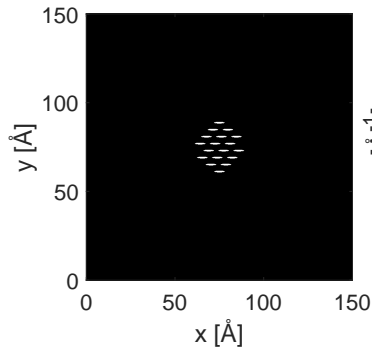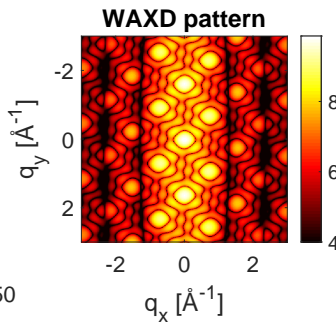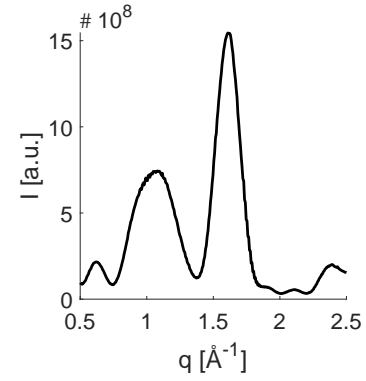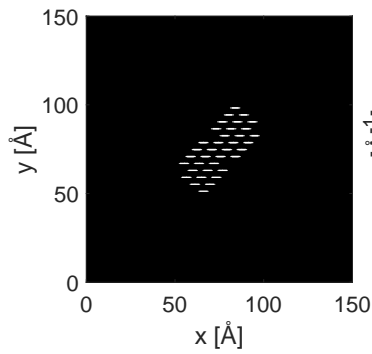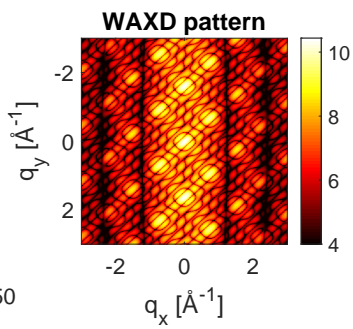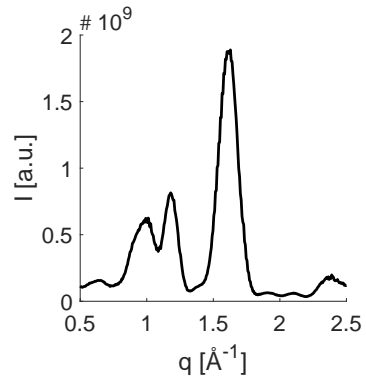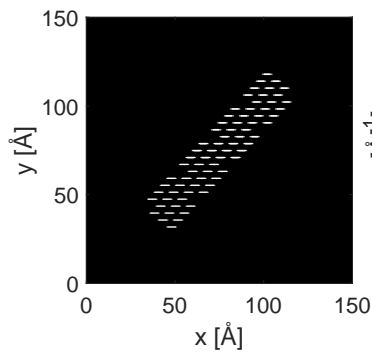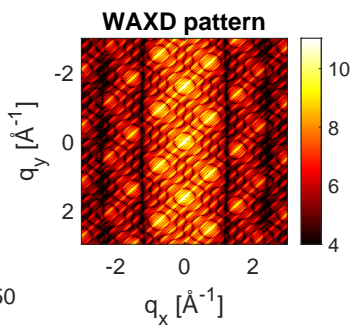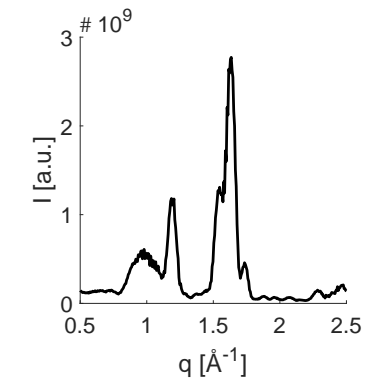

Model: R1+  
Aggregation direction: (1-10)

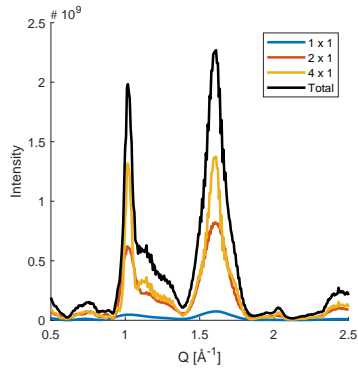

Sample #1  
Vol% 1x1: 4.7  
Vol% 2x1: 42.3  
Vol% 4x1: 53.0

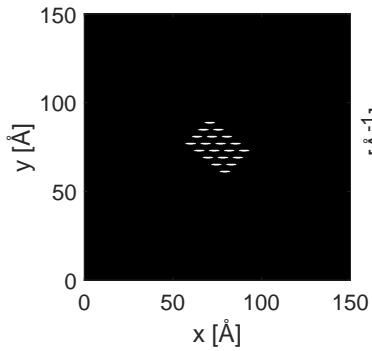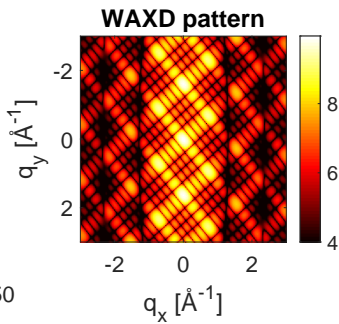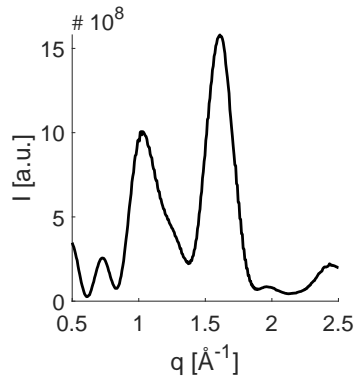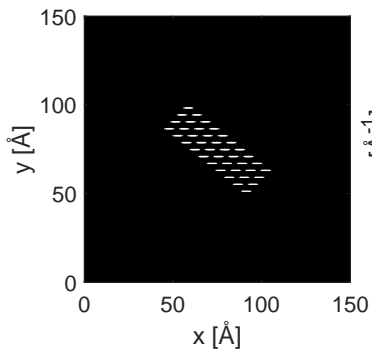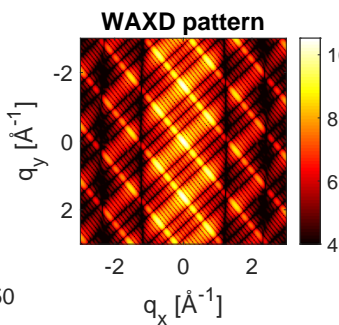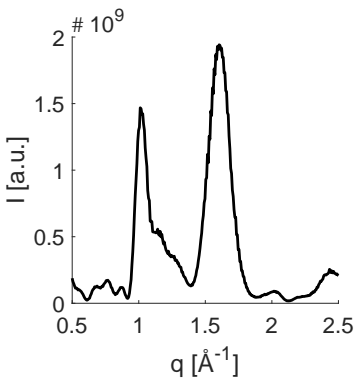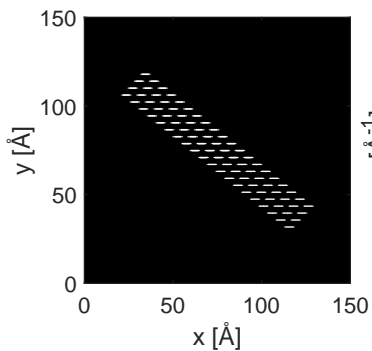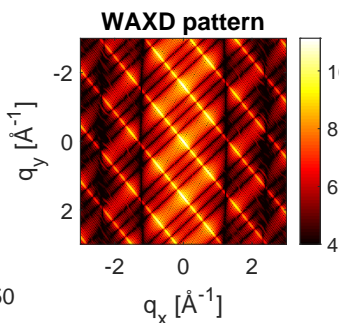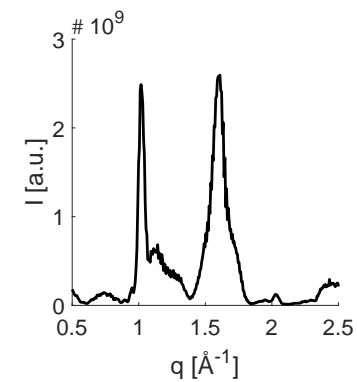

Model: R1+  
Aggregation direction: (110)

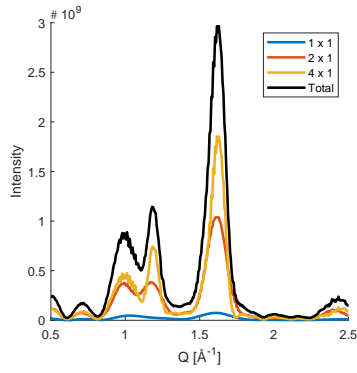

Sample #1  
Vol% 1x1: 4.7  
Vol% 2x1: 42.3  
Vol% 4x1: 53.0

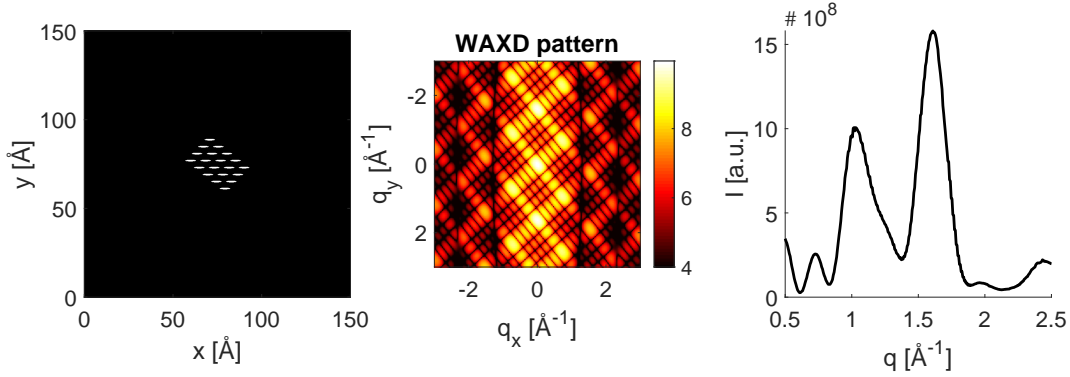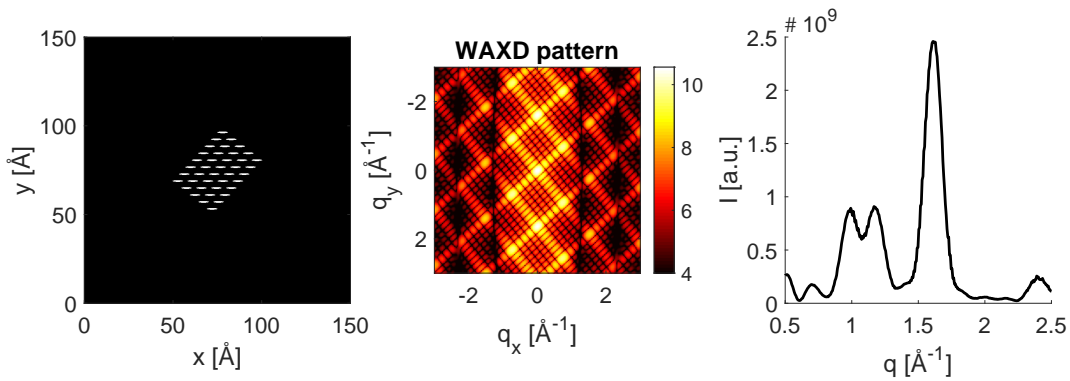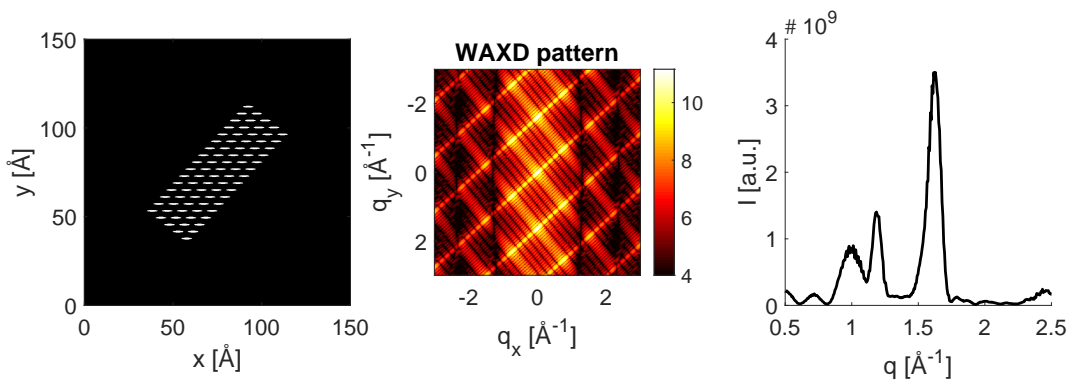

Model: R1-

Aggregation direction: (1-10)

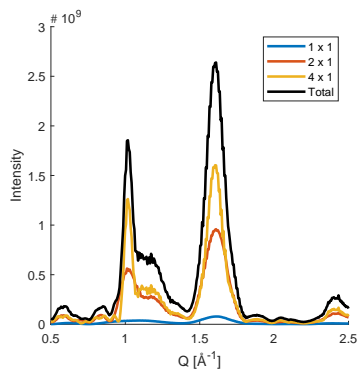

Sample #1

Vol% 1x1: 4.7

Vol% 2x1: 42.3

Vol% 4x1: 53.0

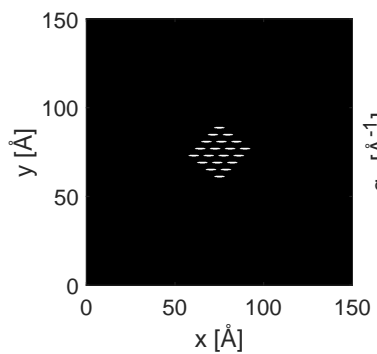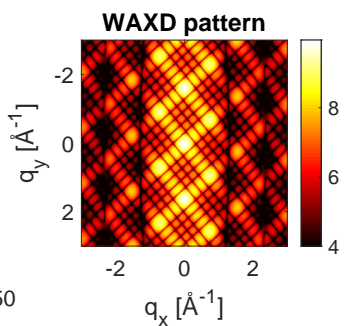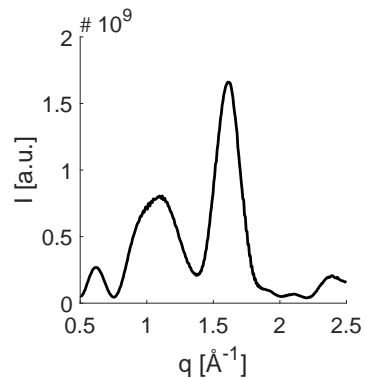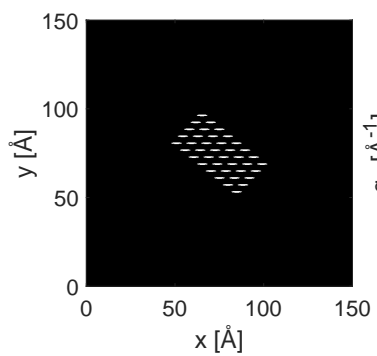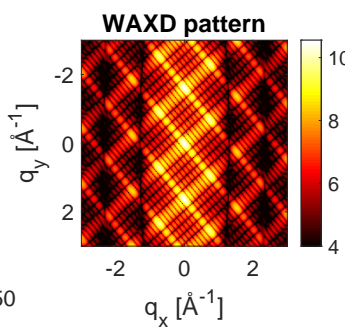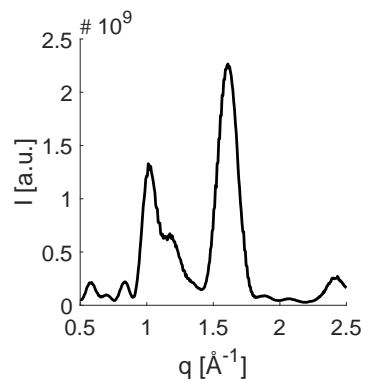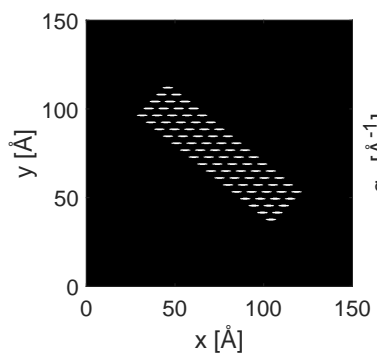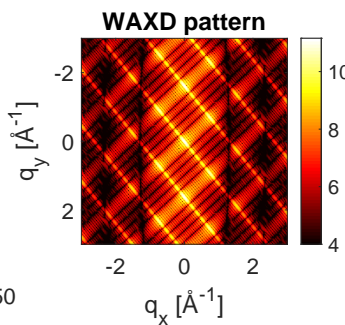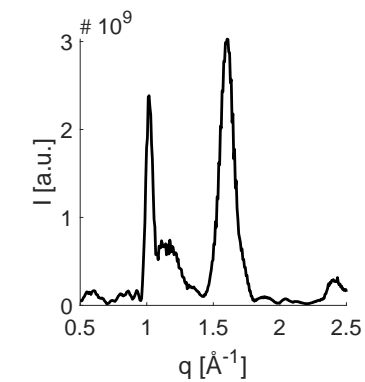

Model: R1-

Aggregation direction: (110)

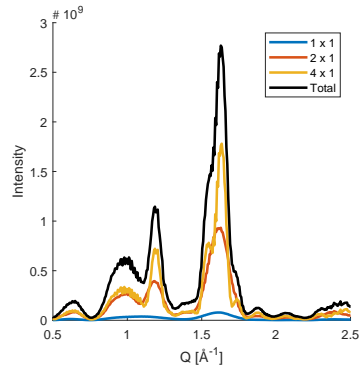

Sample #1

Vol% 1x1: 4.7

Vol% 2x1: 42.3

Vol% 4x1: 53.0

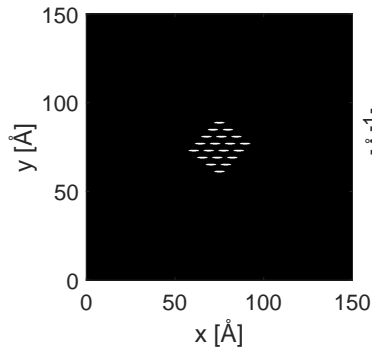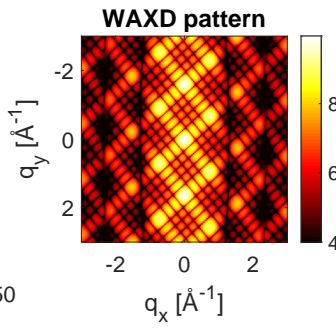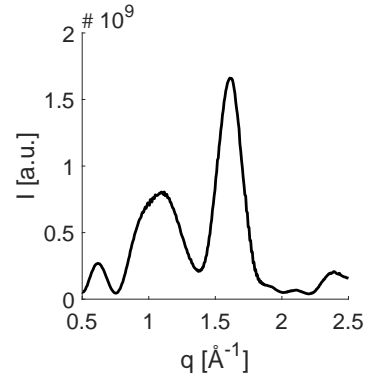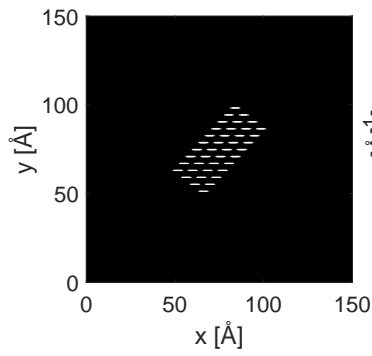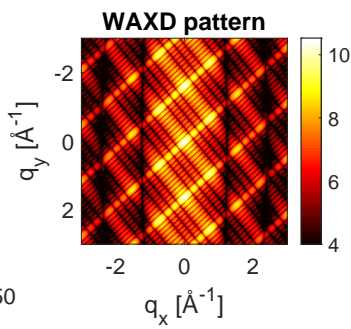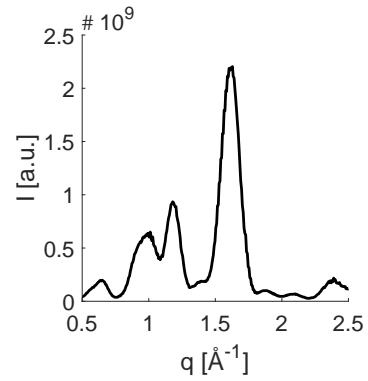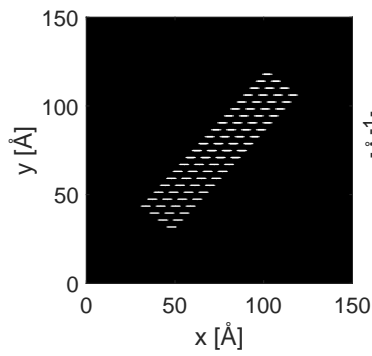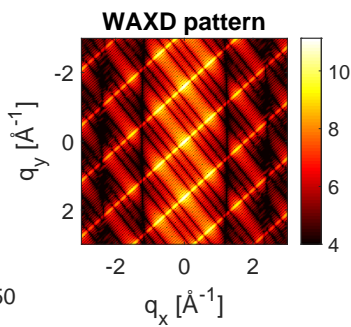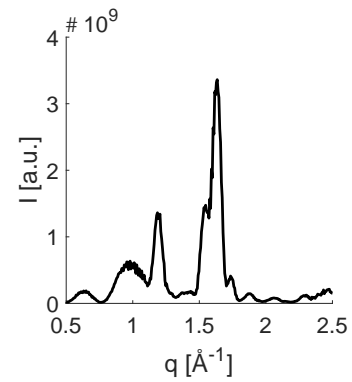

Model: R2+  
 Aggregation direction: (1-10)

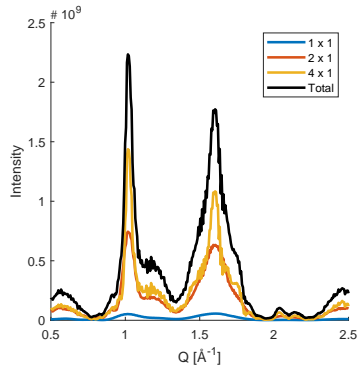

Sample #1  
 Vol% 1x1: 4.7  
 Vol% 2x1: 42.3  
 Vol% 4x1: 53.0

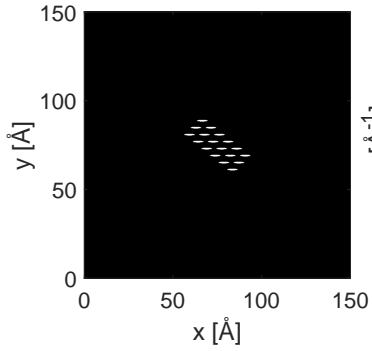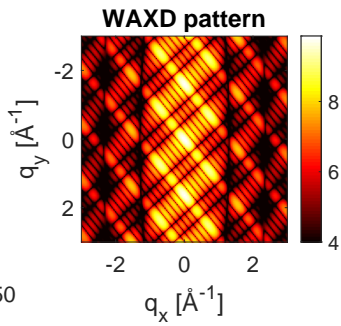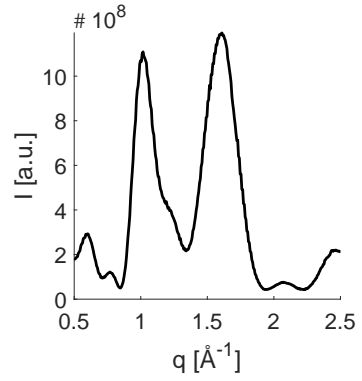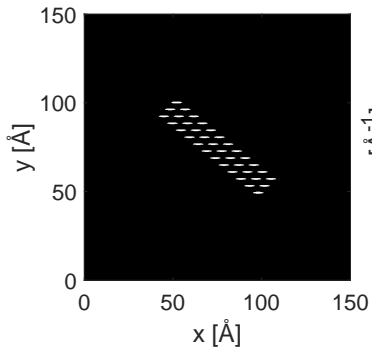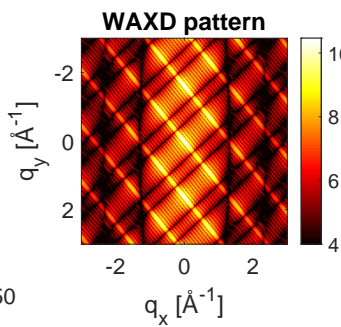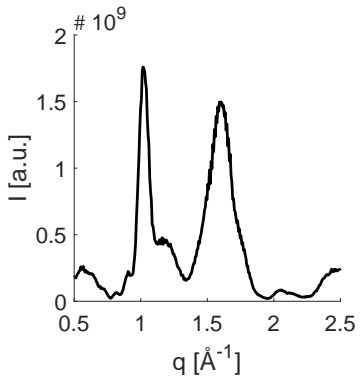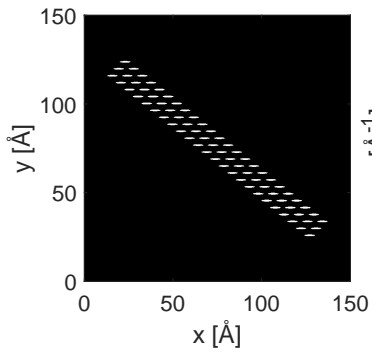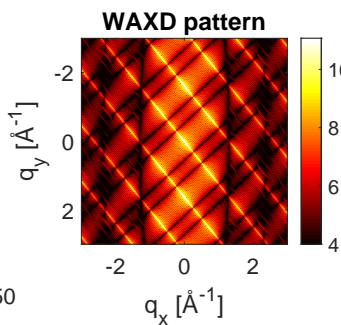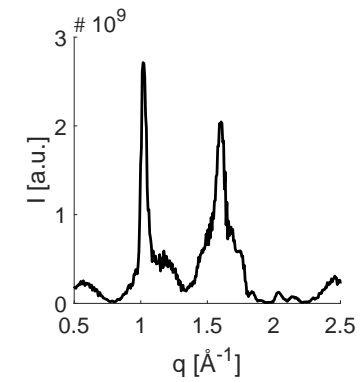

Model: R2+

Aggregation direction: (110)

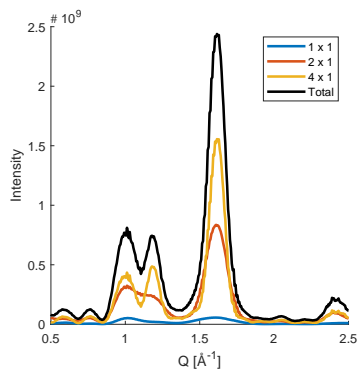

Sample #1

Vol% 1x1: 4.7

Vol% 2x1: 42.3

Vol% 4x1: 53.0

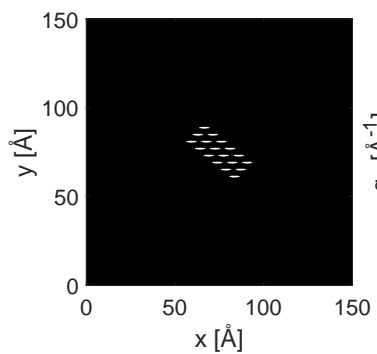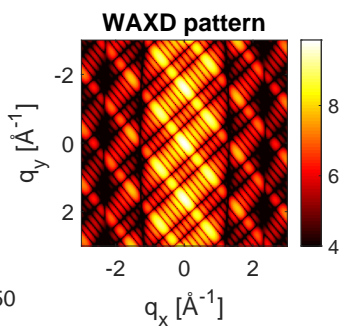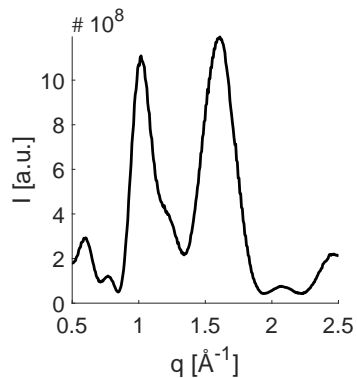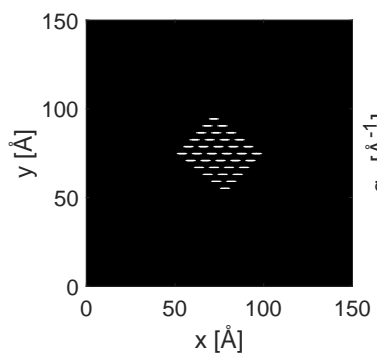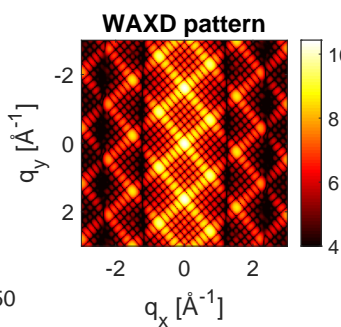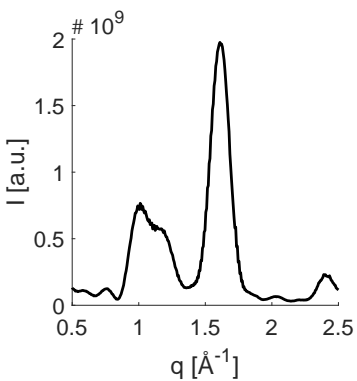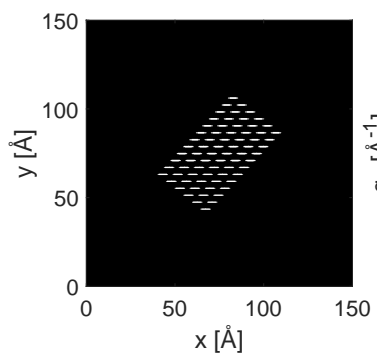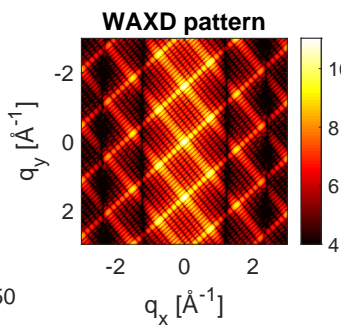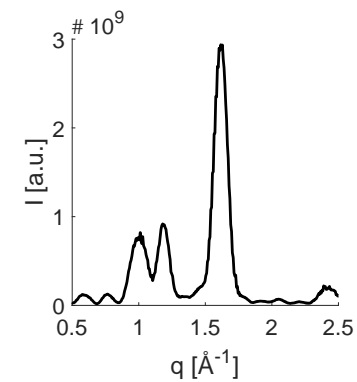



Model: R2-

Aggregation direction: (1-10)

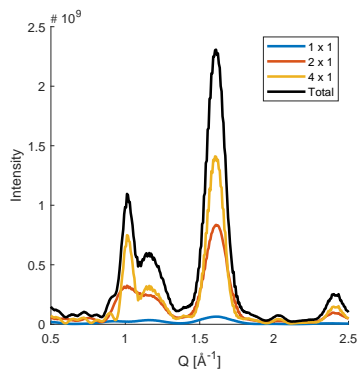

Sample #1

Vol% 1x1: 4.7

Vol% 2x1: 42.3

Vol% 4x1: 53.0

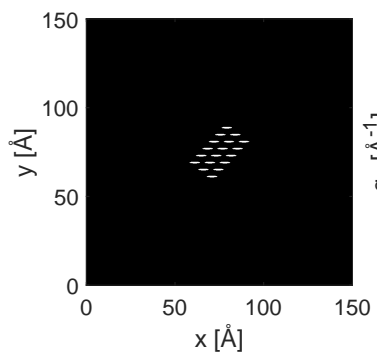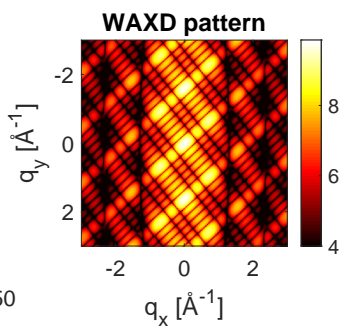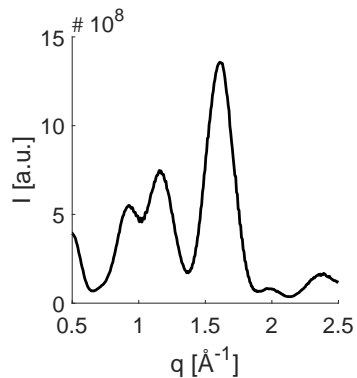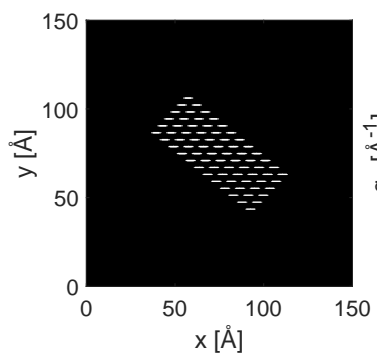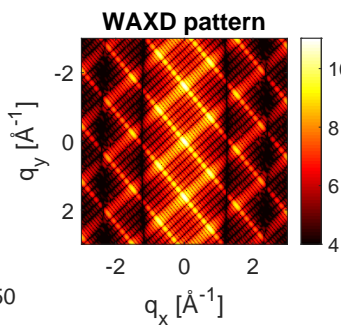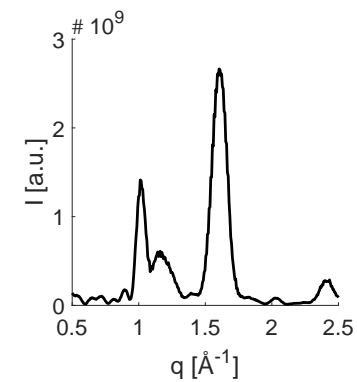

Model: R2-

Aggregation direction: (110)

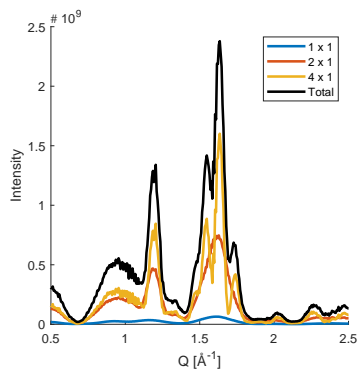

Sample #1

Vol% 1x1: 4.7

Vol% 2x1: 42.3

Vol% 4x1: 53.0

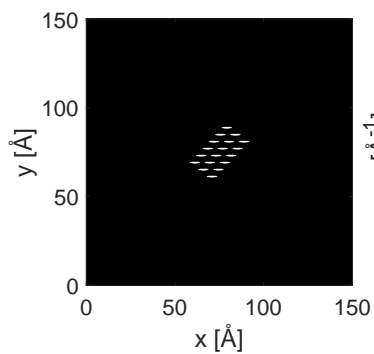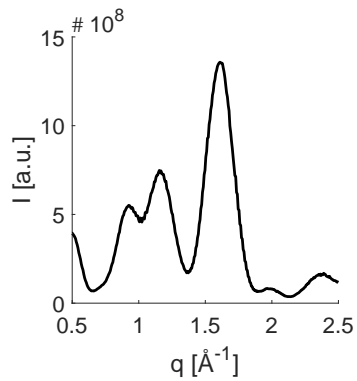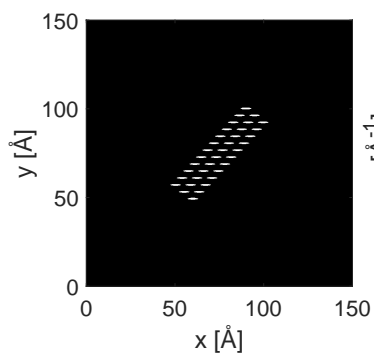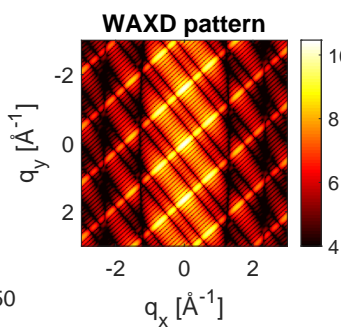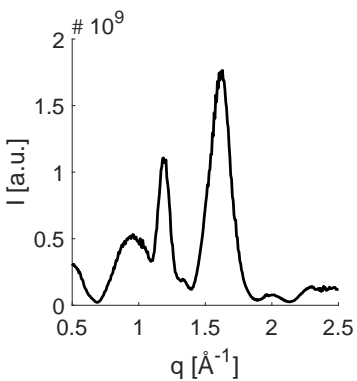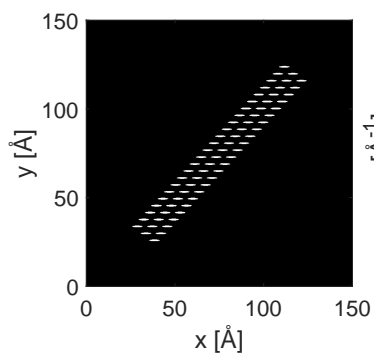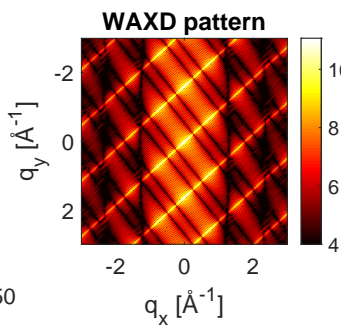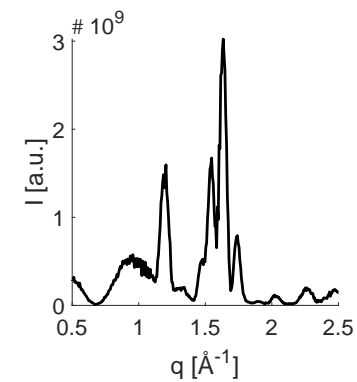

Model: Rh1+

Aggregation direction: (110)

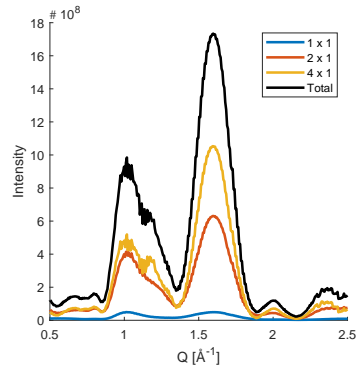

Sample #1

Vol% 1x1: 4.7

Vol% 2x1: 42.3

Vol% 4x1: 53.0

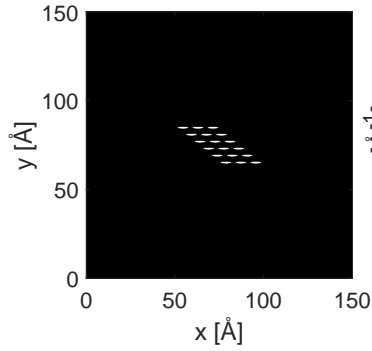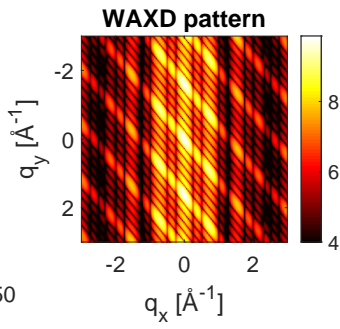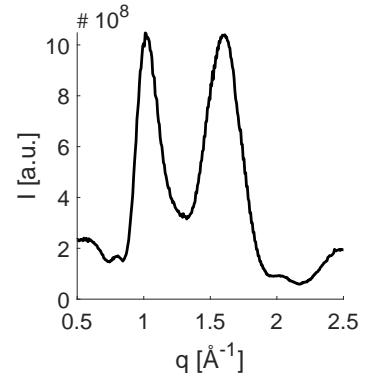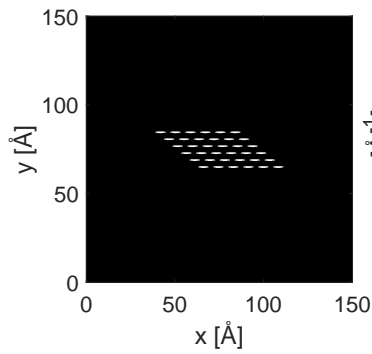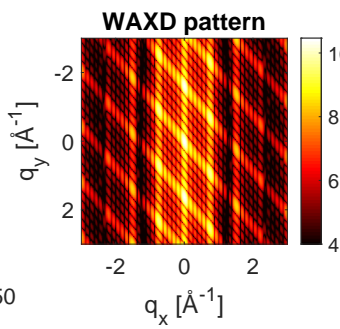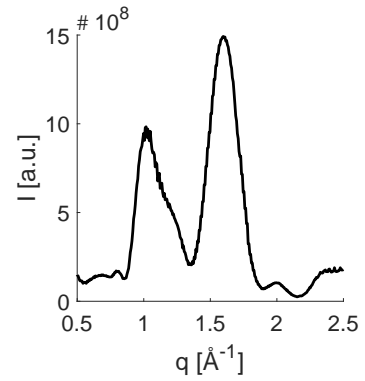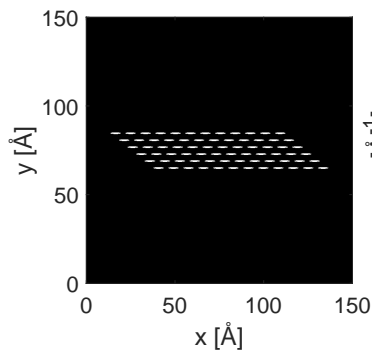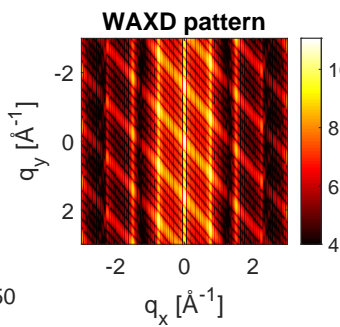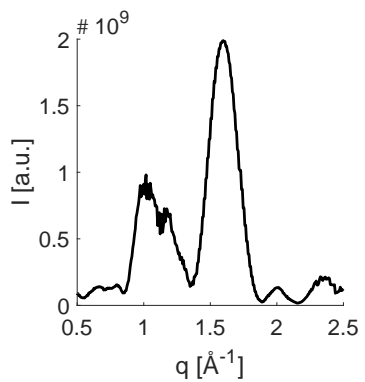

Model: Rh1+

Aggregation direction: (200)

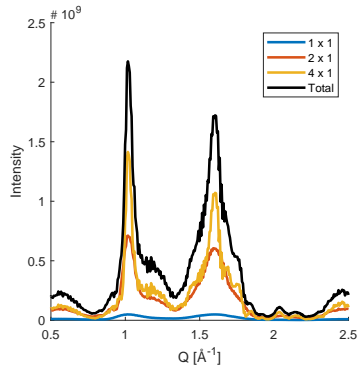

Sample #1

Vol% 1x1: 4.7

Vol% 2x1: 42.3

Vol% 4x1: 53.0

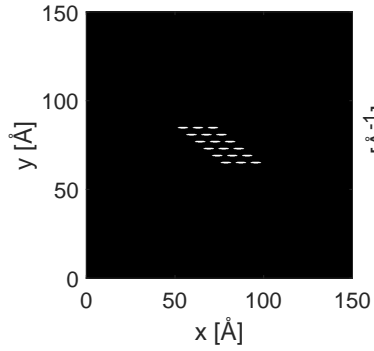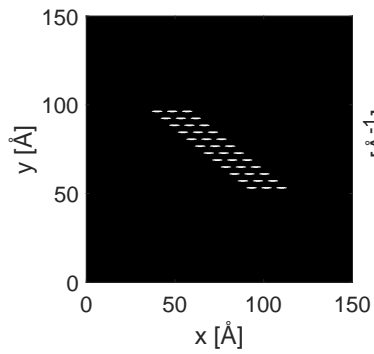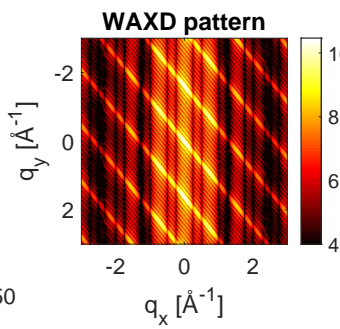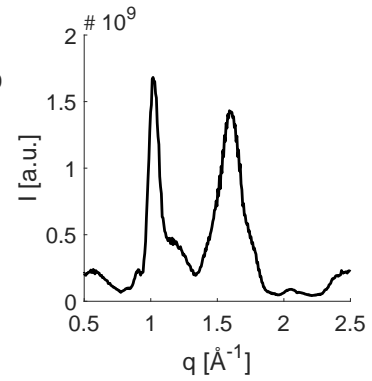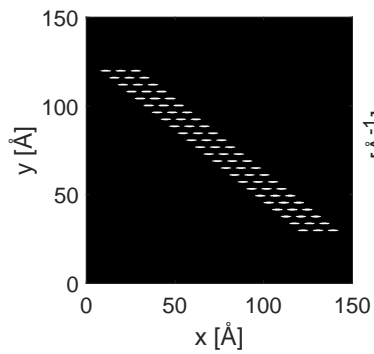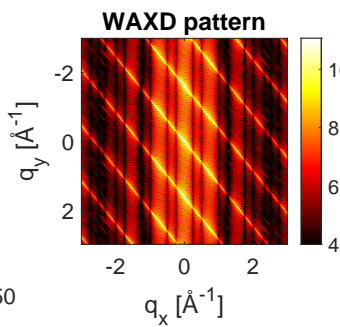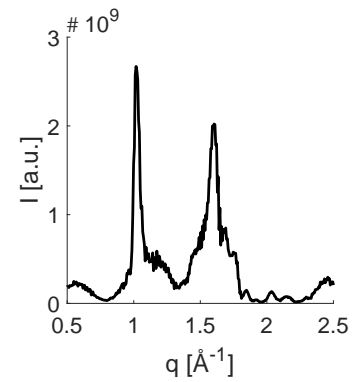

Model: Rh1-

Aggregation direction: (1-10)

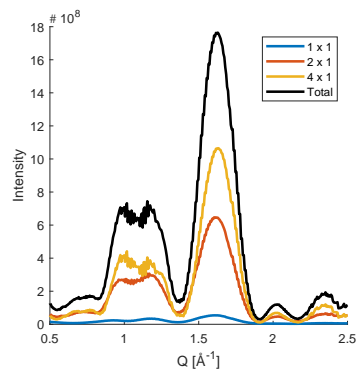

Sample #1

Vol% 1x1: 4.7

Vol% 2x1: 42.3

Vol% 4x1: 53.0

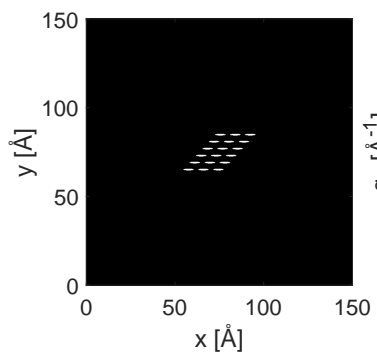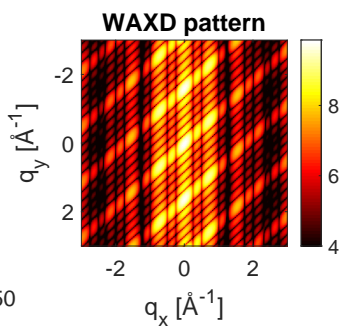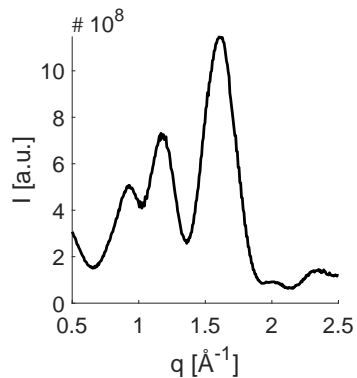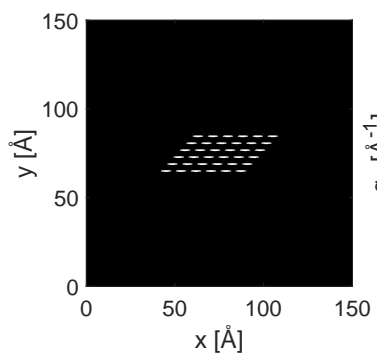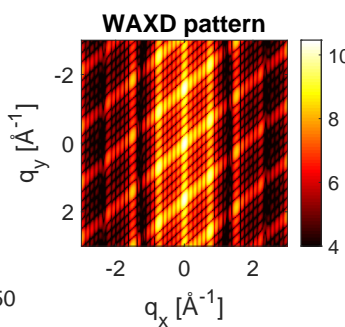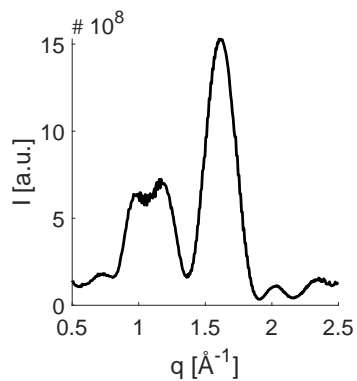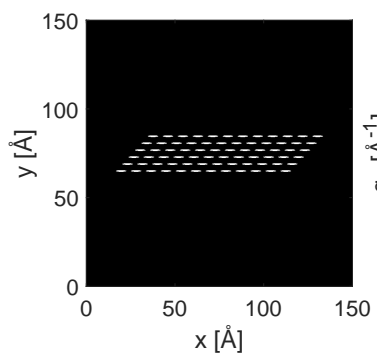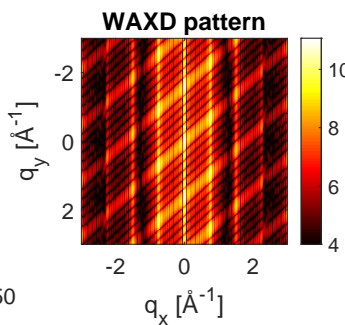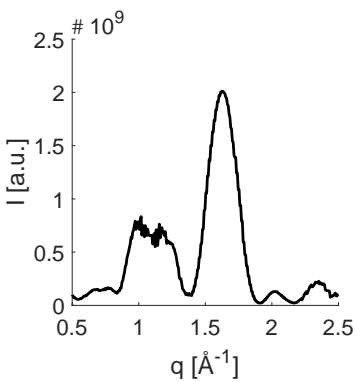

Model: Rh1-

Aggregation direction: (200)

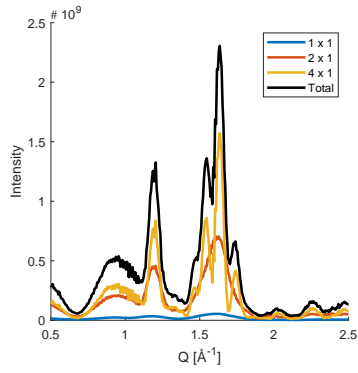

Sample #1

Vol% 1x1: 4.7

Vol% 2x1: 42.3

Vol% 4x1: 53.0

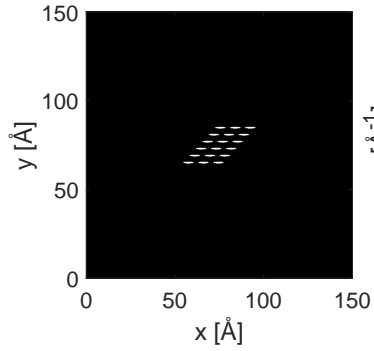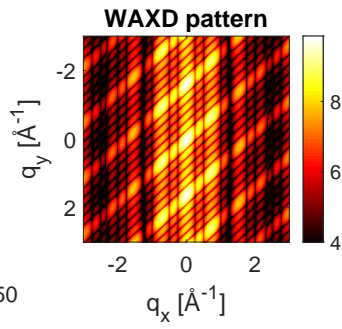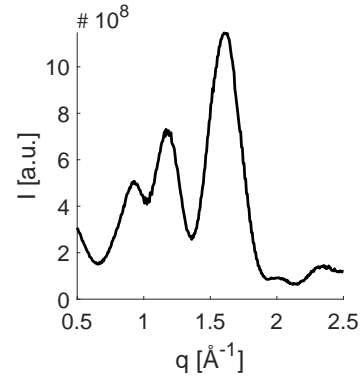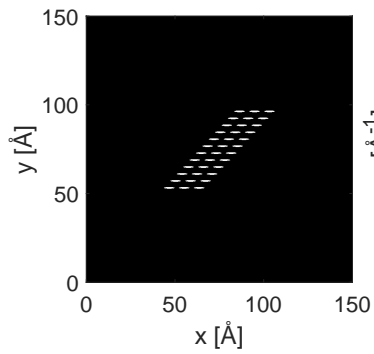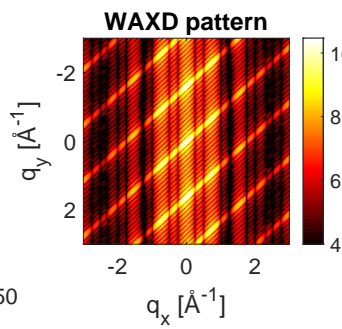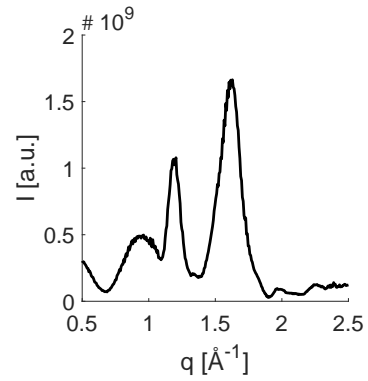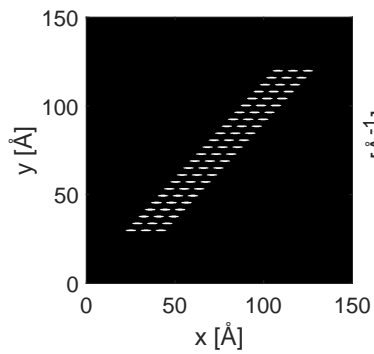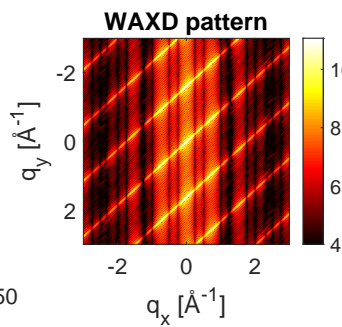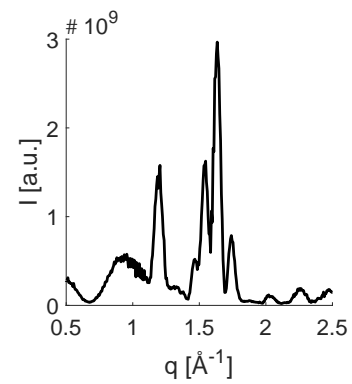

Model: Rh2

Aggregation direction: (010)

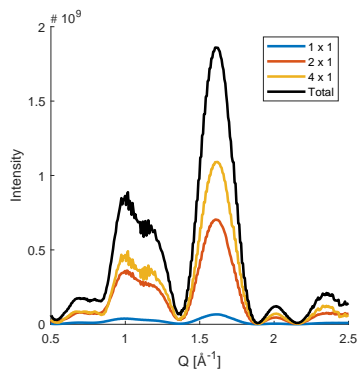

Sample #1

Vol% 1x1: 4.7

Vol% 2x1: 42.3

Vol% 4x1: 53.0

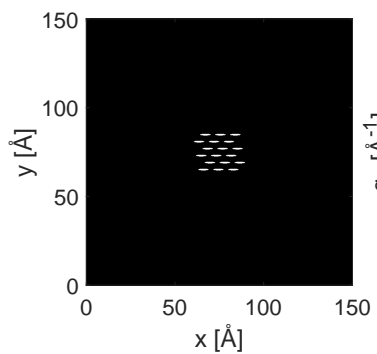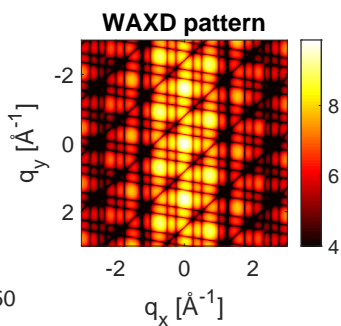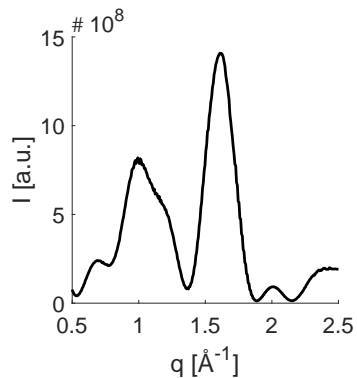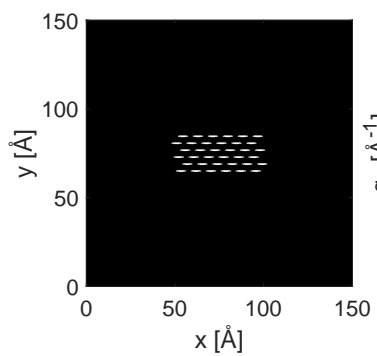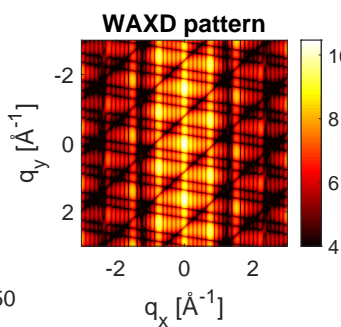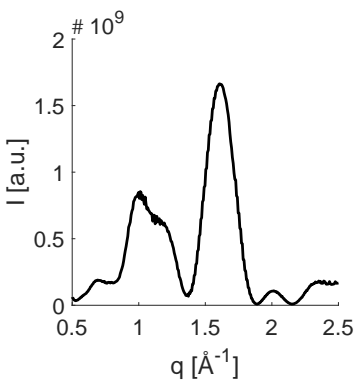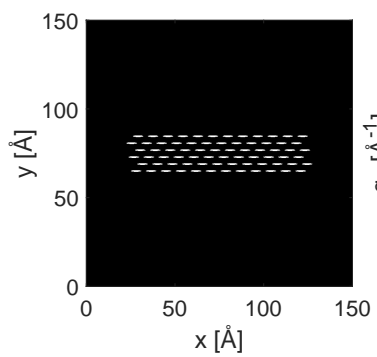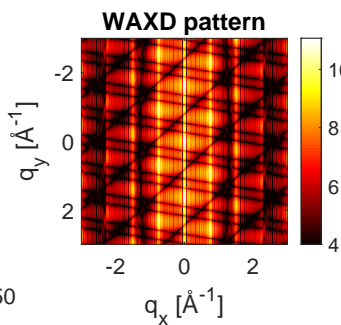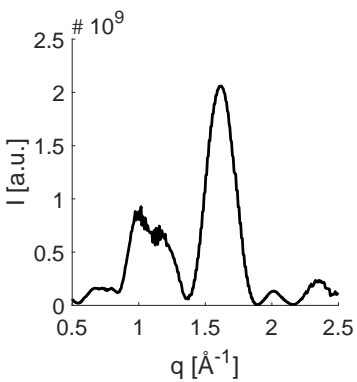

Model: Rh2

Aggregation direction: (200)

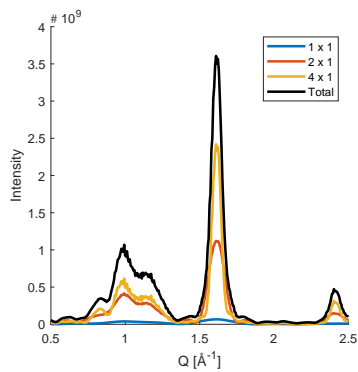

Sample #1

Vol% 1x1: 4.7

Vol% 2x1: 42.3

Vol% 4x1: 53.0

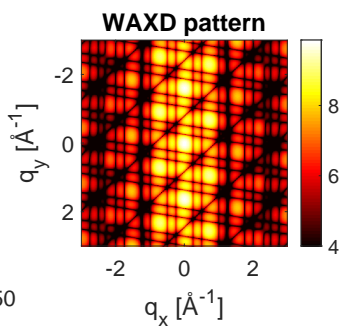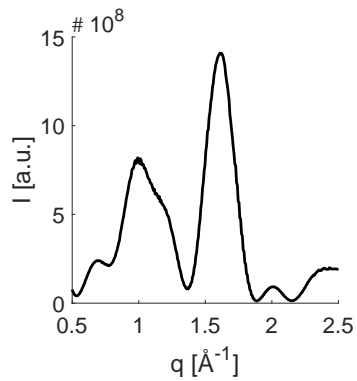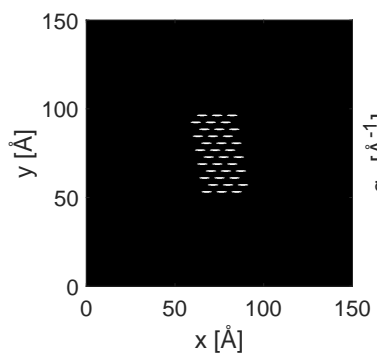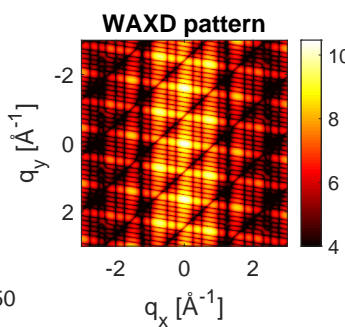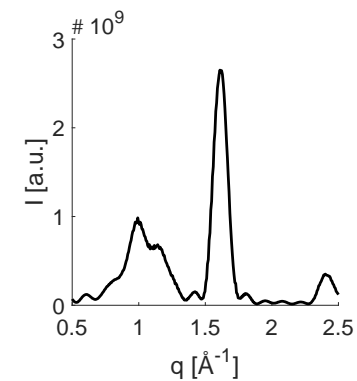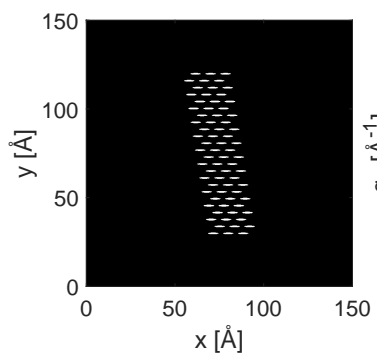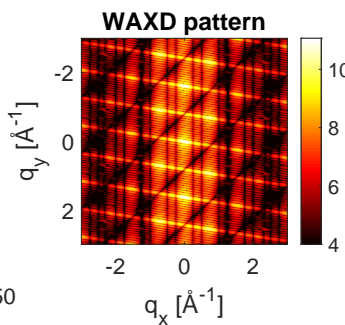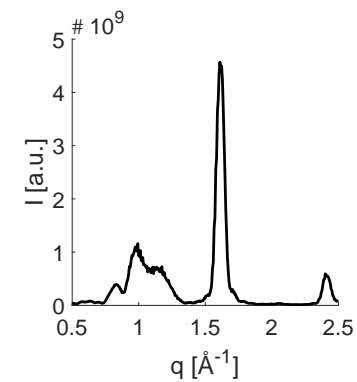



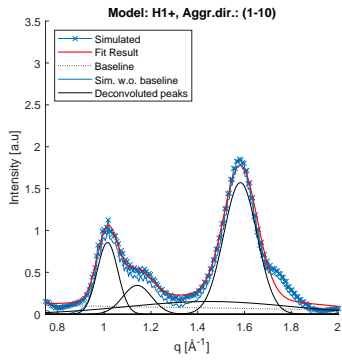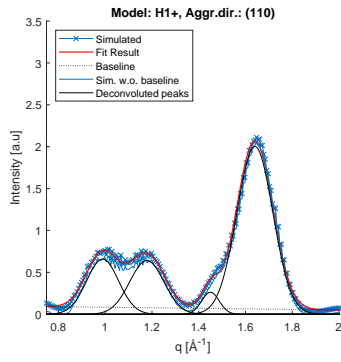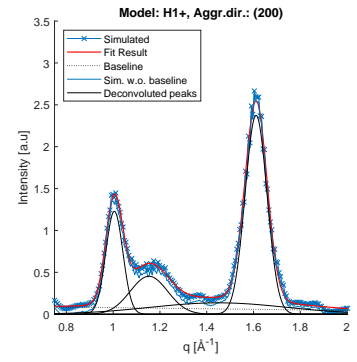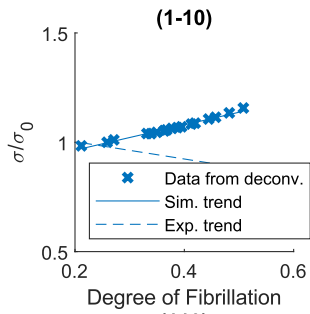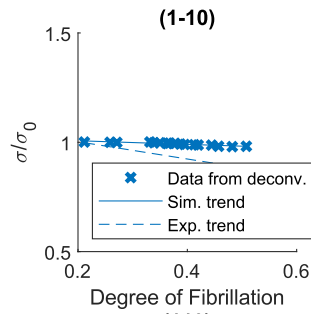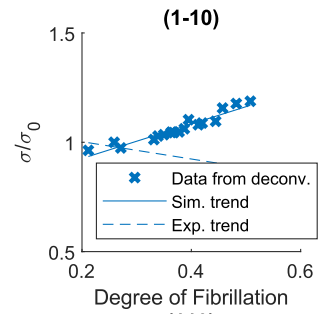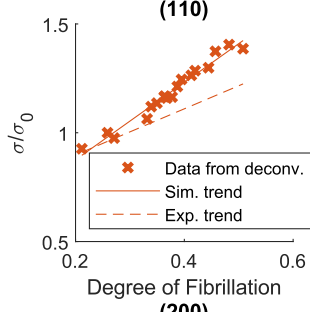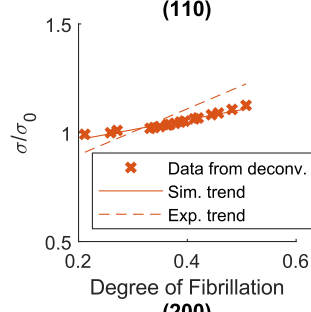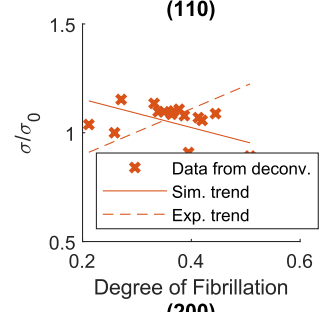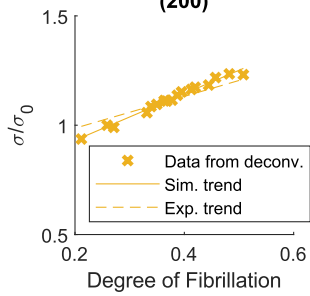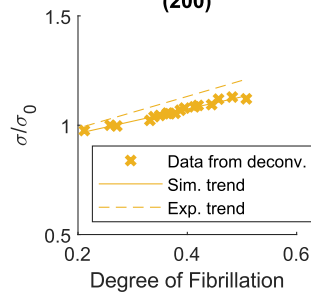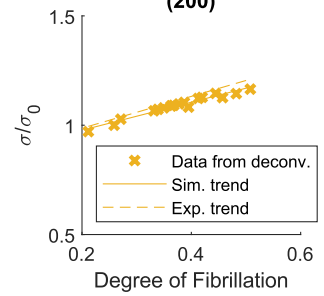

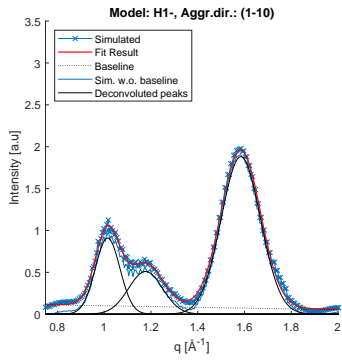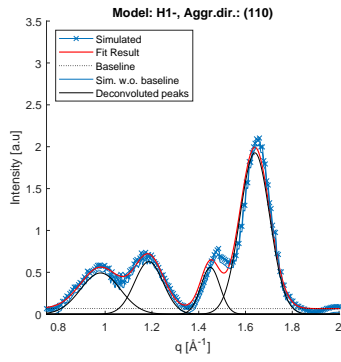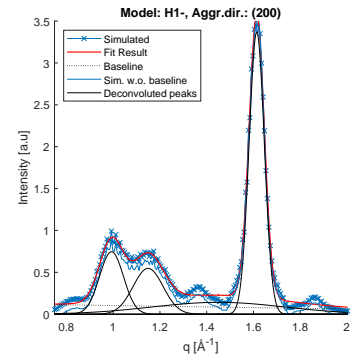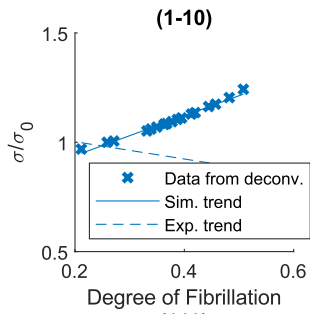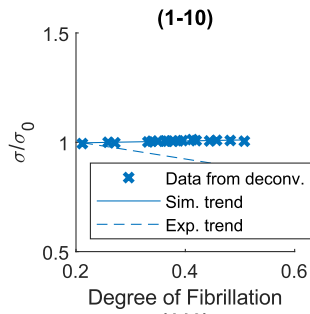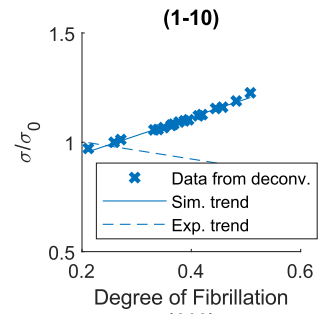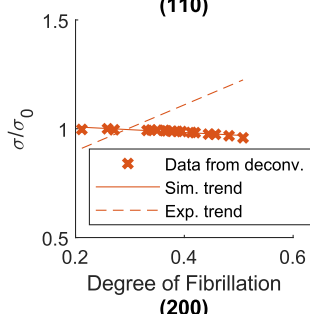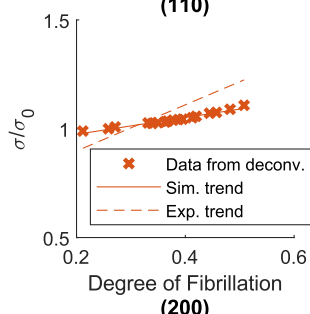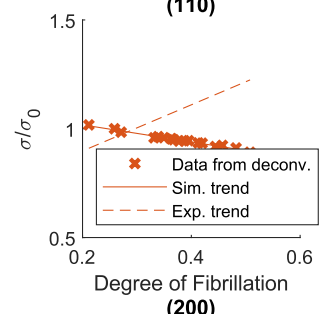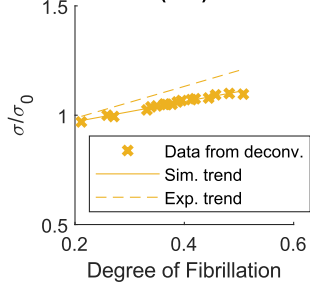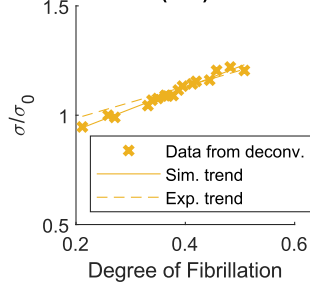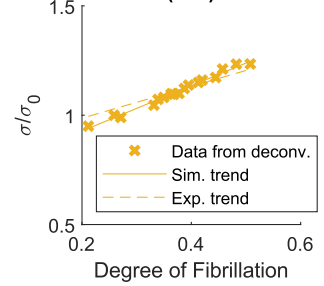

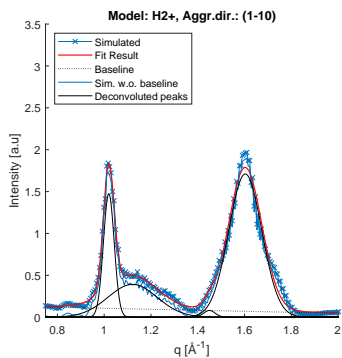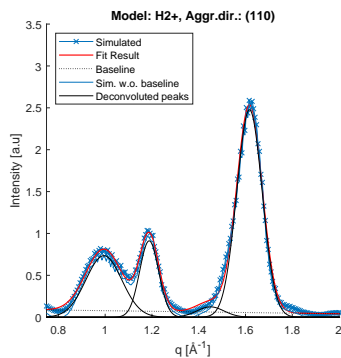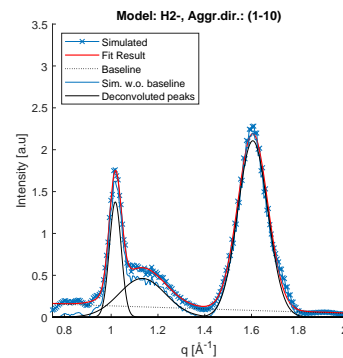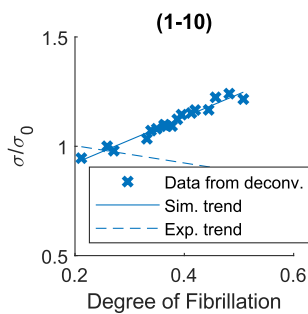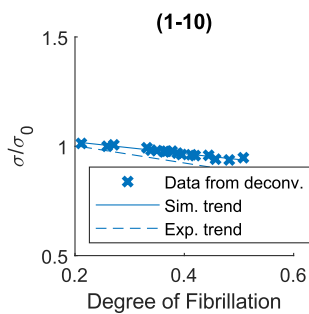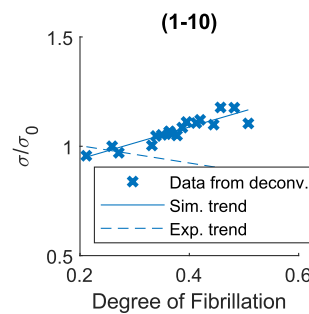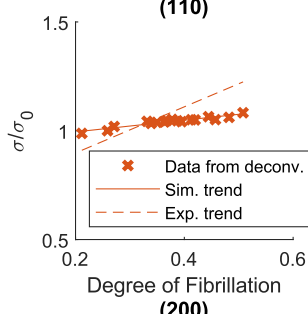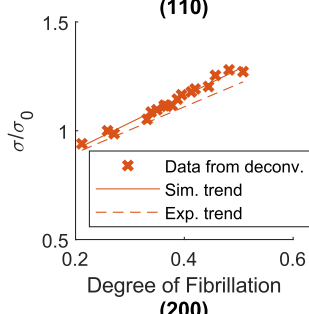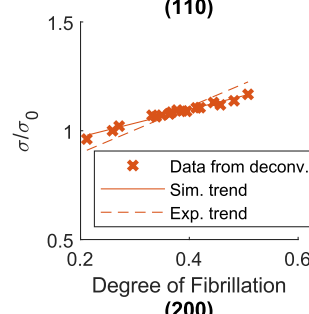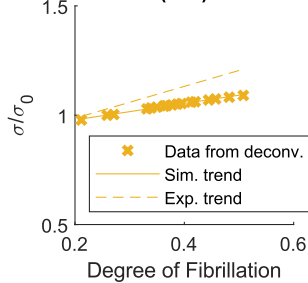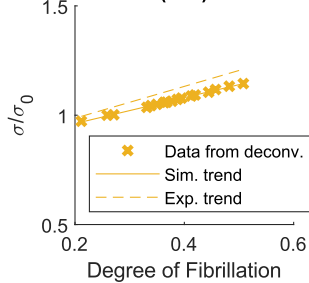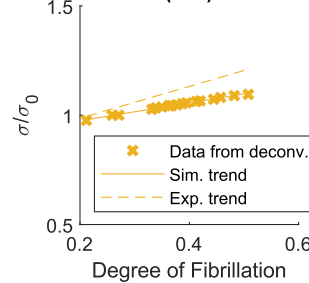

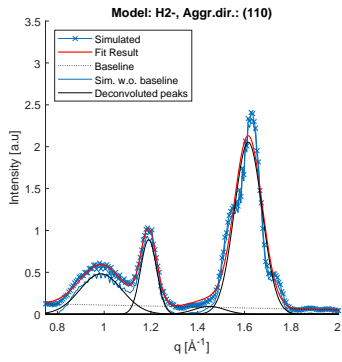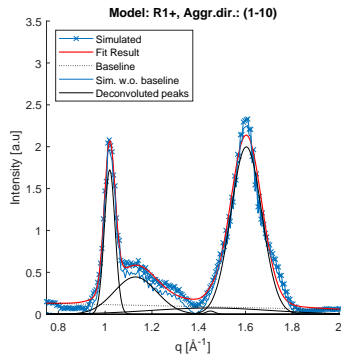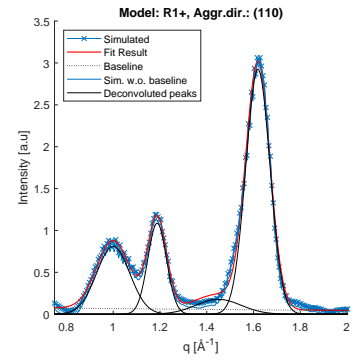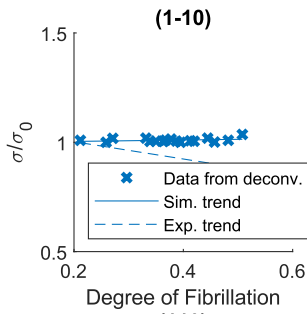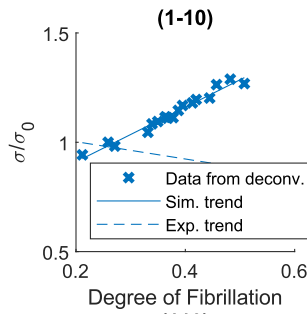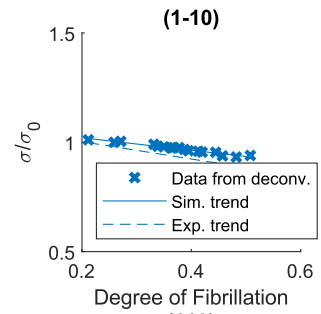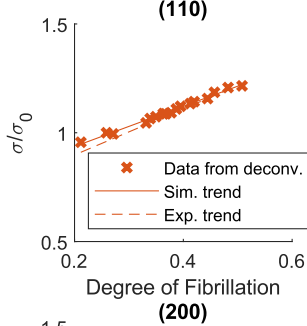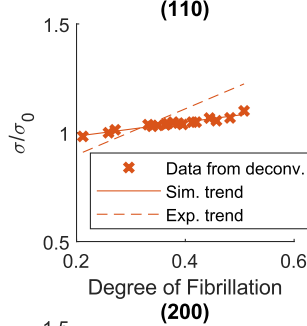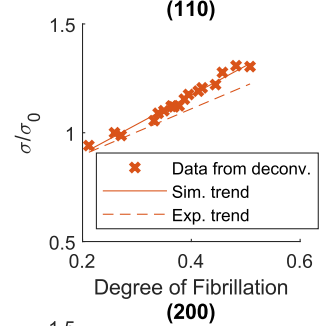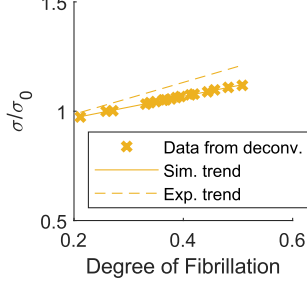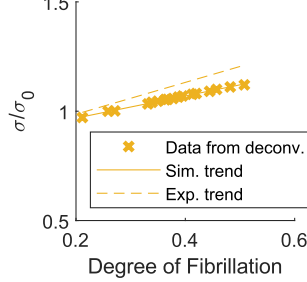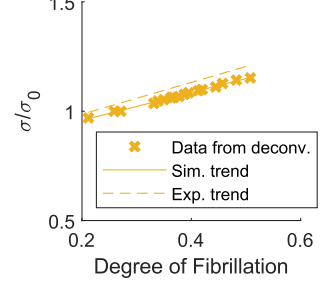

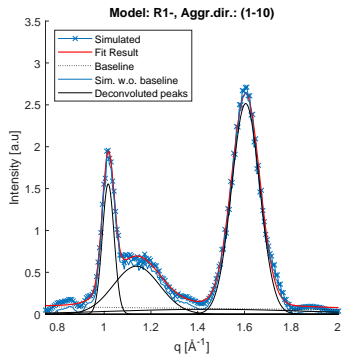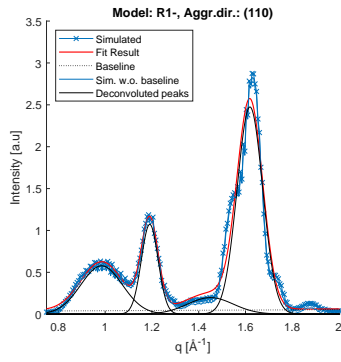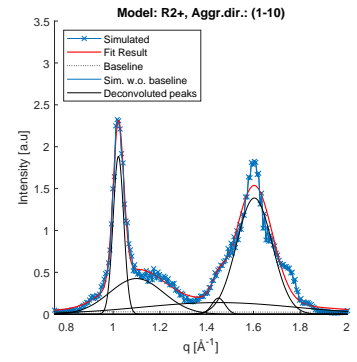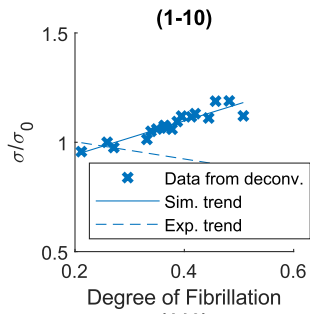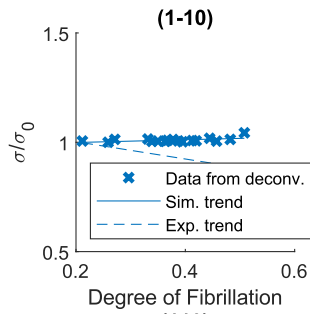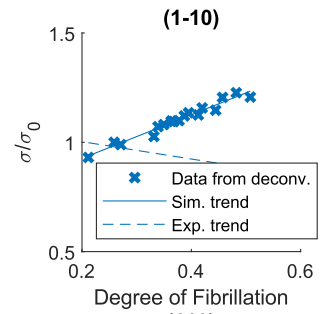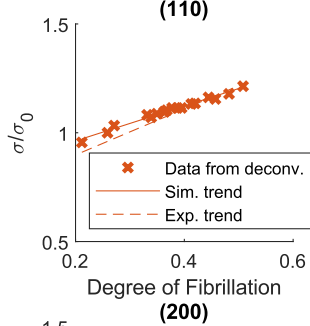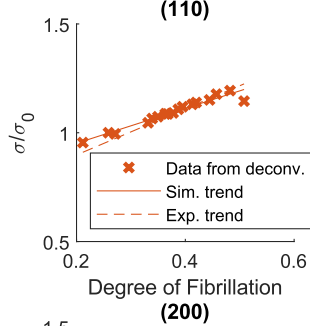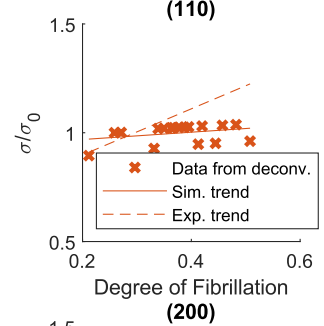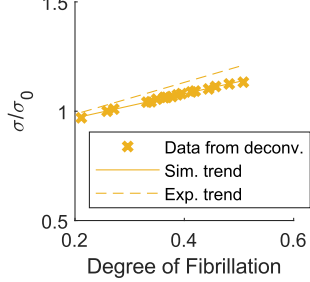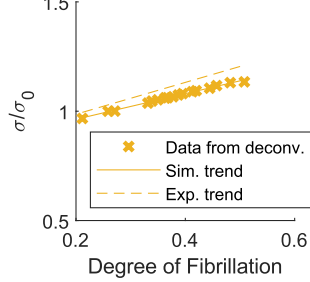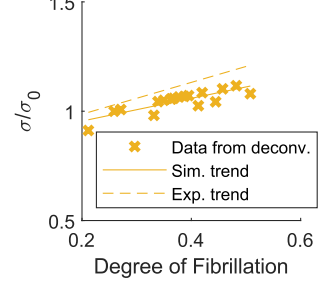

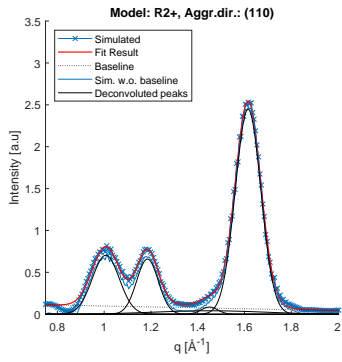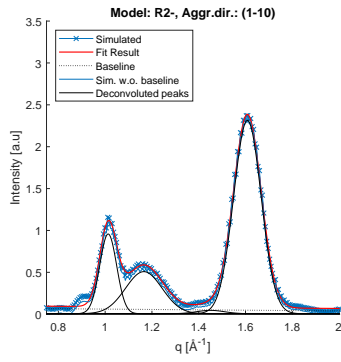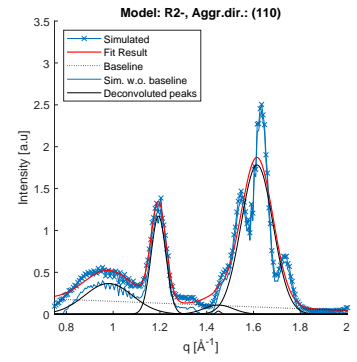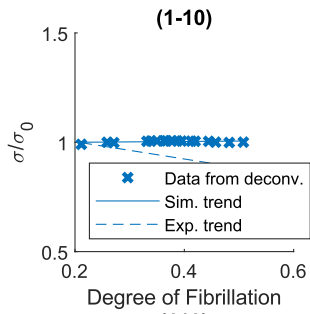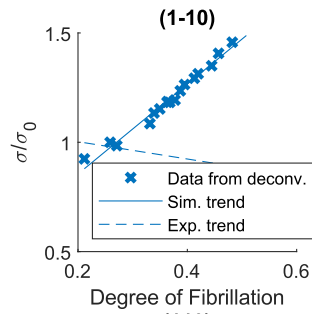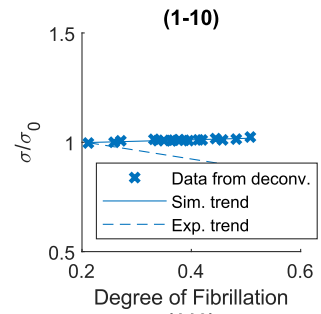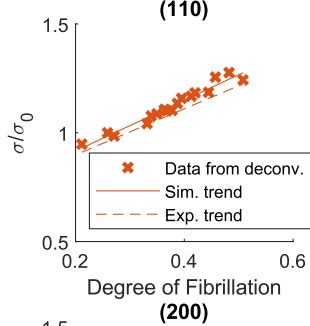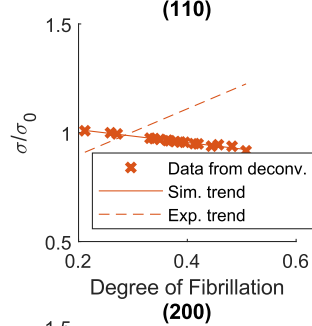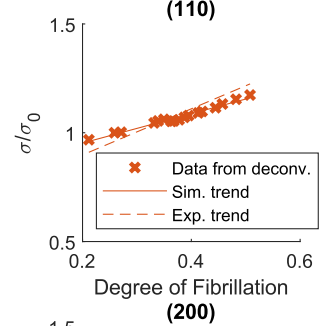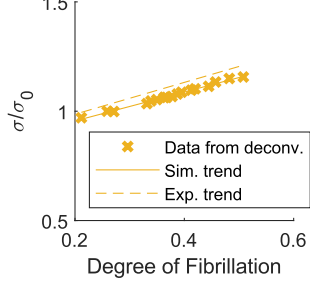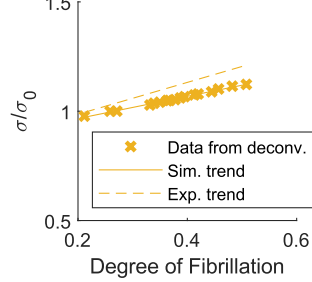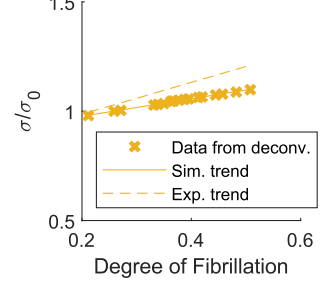

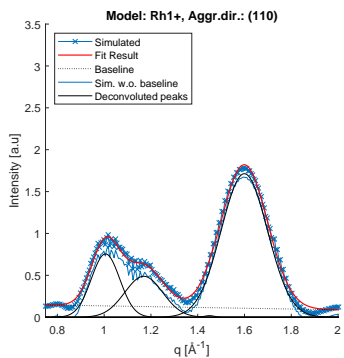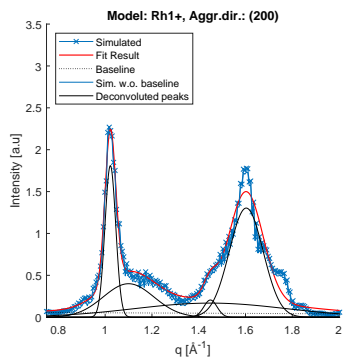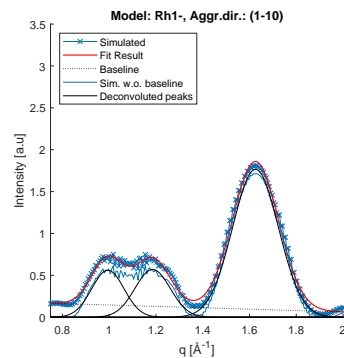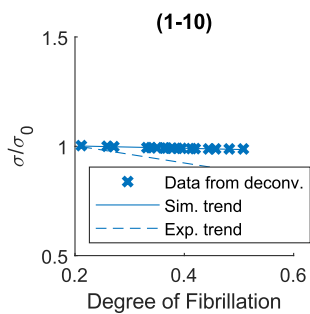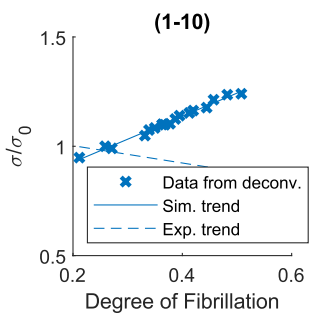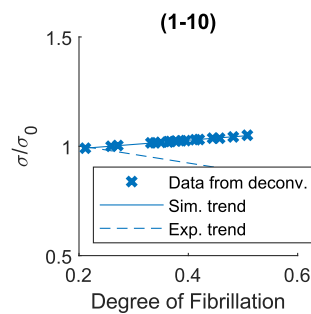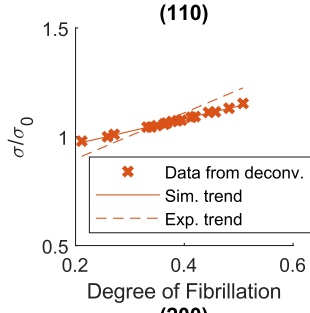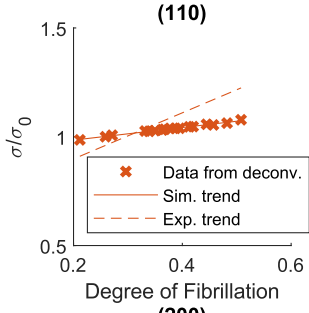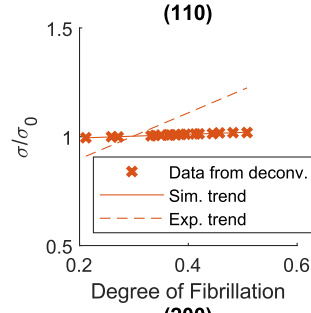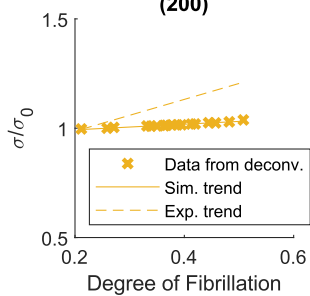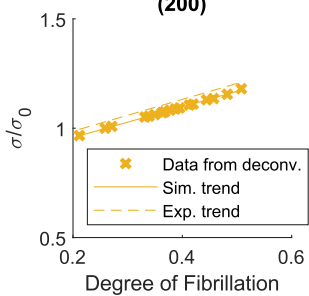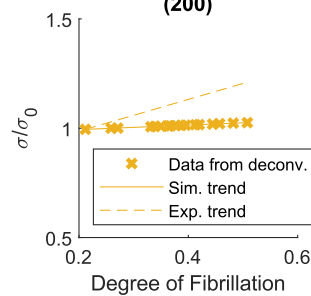

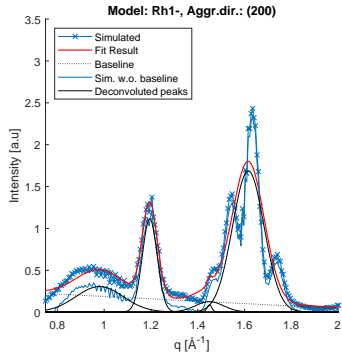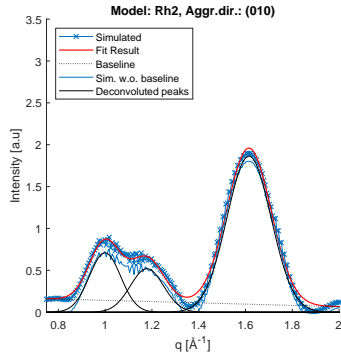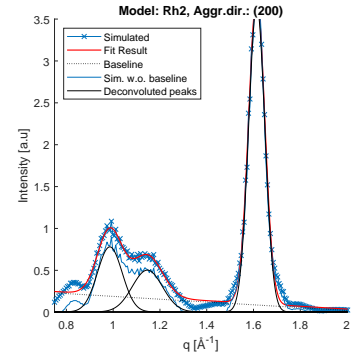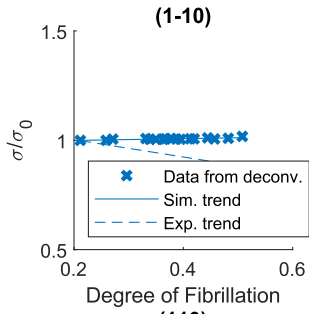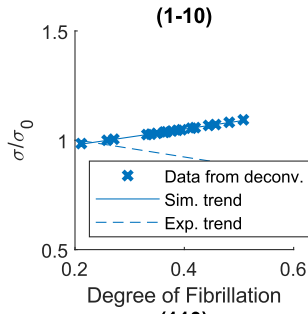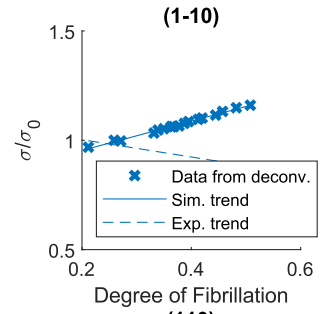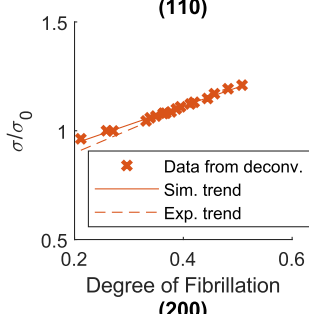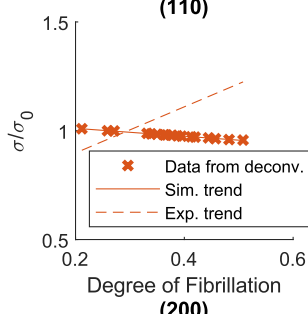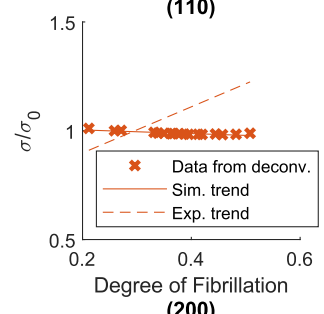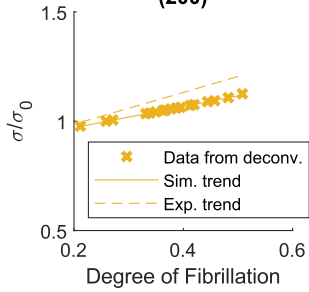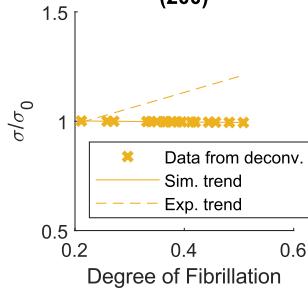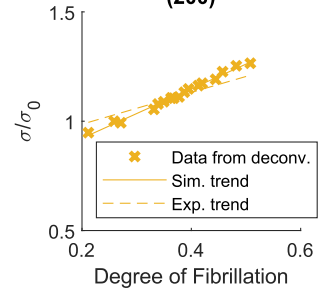

Supplement: nn0c04570_si_002.pdf [file nn0c04570_si_002.pdf]
